# Supplementary material for: Enantioselective domino reaction of CO2, amines and allyl chlorides under iridium catalysis: formation of allyl carbamates
Source: Royal Society of Chemistry journal article supplement (doi:10.1039/c4cc00413b), 2014-01-01
Supplement: c4cc00413b1.pdf [file c4cc00413b1.pdf]

# Enantioselective domino reaction of CO<sub>2</sub>, amine and allyl chloride under iridium catalysis: formation of allyl carbamates

Min Zhang, Xiaoming Zhao,\* Shengcai Zheng

*Department of Chemistry, State Key Laboratory of Pollution Control and Resource Reuse,  
Tongji University 1239 Siping Road, Shanghai 200092, P. R. China  
E-mail: xmzhao08@mail.tongji.edu.cn*

|                                                                                                                                         |    |
|-----------------------------------------------------------------------------------------------------------------------------------------|----|
| General .....                                                                                                                           | 1  |
| Synthesis of allyl chloride <b>2k</b> .....                                                                                             | 2  |
| General procedure for enantioselective domino reaction of allyl chloride <b>2</b> , CO <sub>2</sub> <b>1</b> , and amine <b>3</b> ..... | 2  |
| Synthesis of <b>5a</b> and <b>6</b> .....                                                                                               | 5  |
| Synthesis of compound <b>7k</b> .....                                                                                                   | 9  |
| Controlling experiment .....                                                                                                            | 10 |
| NMR spectra of the compounds <b>2k</b> , <b>4</b> , <b>5</b> , <b>6</b> and <b>7k</b> .....                                             | 12 |
| HPLC chromatograms of the chiral compounds .....                                                                                        | 69 |

**General:** All manipulations were carried out under the argon atmosphere using standard Schlenk techniques. All glassware was oven or flame dried immediately prior to use. All solvents were purified and dried according to standard methods prior to use, unless stated otherwise.

All reagents were obtained from commercial sources and used without further purification. <sup>1</sup>H NMR spectra were obtained at 400 MHz and recorded relative to tetramethylsilane signal (0 ppm) or residual protio-solvent. <sup>13</sup>C NMR spectra were obtained at 100 MHz and chemical shifts were recorded relative to the solvent resonance (CDCl<sub>3</sub>, 77.0 ppm). Data for <sup>1</sup>H NMR are recorded as follows: chemical shift (δ, ppm), multiplicity (s = singlet, d = doublet, t = triplet, m = multiplet or unresolved, br = broad singlet, coupling constant(s) in Hz, integration). Data for <sup>13</sup>C NMR are reported in terms of chemical shift (δ, ppm).

The phosphoramidite ligands<sup>[1]</sup>, ligand L6<sup>[2]</sup> and substituted allyl chlorides<sup>[3]</sup> were prepared according to the known procedures.

## Synthesis of the allylic chloride (**2k**)

An oven-dried round-bottomed flask equipped with a magnetic stir bar was charged with (2*E*,2'*E*)-3,3'-(1,2-phenylene)diprop-2-en-1-ol<sup>[4]</sup> (5.26 mmol), 1*H*-benzo[*d*]-[1,2,3]tirazole (12.63 mmol, 2.4 equiv) and dichloromethane (10.0 mL) under argon atmosphere. The solution was cooled to 0 °C and thionyl chloride (12.63 mmol, 2.4 equiv) was added dropwise. The reaction mixture was stirred at 0 °C for 2 h, and then warmed to room temperature for 1 h. The reaction mixture was filtered and washed with 2 % NaOH aqueous solution and brine, respectively. The organic layer was dried over anhydrous

sodium sulfate, filtered, and concentrated in vacuo. The crude residue was purified by flash column chromatography (hexane/ethyl acetate/ triethylamine) to provide 1,2-bis((*E*)-3-chloroprop-1-enyl)benzene (830 mg, 70 % yield).

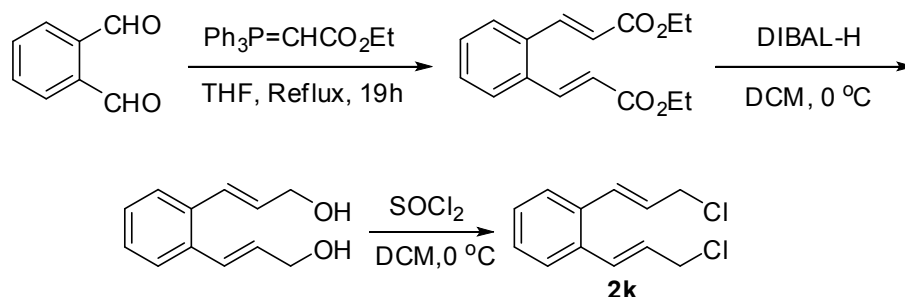

**1,2-Bis((*E*)-3-chloroprop-1-enyl)benzene 2k:** White solid, m.p. 81.2–81.7 °C, 70 % yield. <sup>1</sup>H NMR (400 MHz, CDCl<sub>3</sub>) δ = 7.44-7.42 (m, 2H), 7.28-7.25 (m, 2H), 6.92 (d, *J* = 15.6 Hz, 2H), 6.19 (dt, *J* = 15.2, 7.2 Hz, 2H), 4.26 ppm (dd, *J* = 16.8, 1.2 Hz, 4H). <sup>13</sup>C NMR (100 MHz, CDCl<sub>3</sub>) δ = 134.5, 131.5, 128.3, 127.8, 126.9, 45.2 ppm. IR (KBr): ν<sub>max</sub> (cm<sup>-1</sup>) = 3058, 1617, 1248, 964, 749, 670, 614. Anal. calcd for C<sub>12</sub>H<sub>12</sub>Cl<sub>2</sub>: C, 63.46; H, 5.32; Cl, 31.22. Found: C, 63.50; H, 5.31; Cl, 31.19.

#### General procedure for domino reaction of allyl chloride (**2**), CO<sub>2</sub> (**1**) and amine (**3**) in the presence of iridium complex:

[Ir(COD)Cl]<sub>2</sub> (0.008 mmol, 4 mol %), phosphoramidite ligand L1, [*O,O'*-(*S*)-(1,1'-dinaphthyl-2,2'-diyl)-*N,N'*-di-(*S,S*)-[phenylethylphosphoramidite] (0.016 mmol, 8 mol %) were dissolved in THF (0.5 mL) and propylamine (0.3 mL) in a dry Schlenk tube filled with argon. The reaction mixture was heated at 50 °C for 30 min, and then the volatile solvents were removed under vacuum to give a yellow solid. After that, DABCO (0.4 mmol, 200 mol %), amine **3** (0.20 mmol, 100 mol %), and toluene (2.0 mL) were added, the solution was bubbled CO<sub>2</sub> **1** (1 atm) for 10 minutes, then allyl chloride **2** (0.24 mmol, 120 mol %) was added. The reaction was stirring at 15 °C and kept bubbling CO<sub>2</sub> **1** (1 atm). After the completion of the reaction monitoring by TLC, the crude reaction mixture was filtrated with celite and the solvent was removed under reduced pressure. The crude residue was purified by flash column chromatography (petroleum ether/ethyl acetate) to give the desired products **4**.

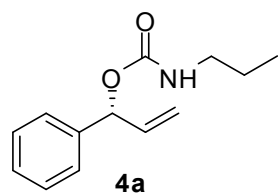

**(*R*)-1-Phenylallyl propylcarbamate (4a):** Colorless oil, 51 % yield, b/l = 90/10, 94 % *ee*. The *ee* of the product was determined by chiral HPLC. [Daicel CHIRALCEL OD-H (0.46 cm x 25 cm); hexane/2-propanol = 90/10; flow rate = 1.0 mL/min; detection wavelength = 214 nm; t<sub>R</sub> = 6.019 (major), 7.008 (minor) min]. [α]<sub>D</sub><sup>20</sup> = +16.6° (c 0.4, CHCl<sub>3</sub>). <sup>1</sup>H NMR (400 MHz, CDCl<sub>3</sub>) δ = 7.38 (d, *J* = 4.4 Hz, 4H), 7.33-7.28 (m, 1H), 6.18 (d, *J* = 5.6 Hz, 1H), 6.02 (ddd, *J* = 16.8, 10.4, 6.0 Hz, 1H), 5.30 (d, *J* = 17.2 Hz, 1H), 5.23 (dt, *J* = 10.4, 1.2 Hz, 1H), 4.79 (br, 1H), 3.18-3.12 (m, 2H), 1.51 (sext, *J* = 7.2 Hz, 2H), 0.91 ppm (t, *J* = 7.2 Hz, 3H). <sup>13</sup>C NMR (100 MHz, CDCl<sub>3</sub>) δ = 155.6, 139.4, 136.8, 128.5, 128.0, 127.0, 116.5, 76.5, 42.8, 23.2, 11.2 ppm. IR(KBr): ν<sub>max</sub> (cm<sup>-1</sup>) = 3476, 2964, 2918, 2843, 1696 (C=O), 1523, 1262, 1263, 698. HRMS (ESI+) calcd for C<sub>13</sub>H<sub>17</sub>NNaO<sub>2</sub> [M+Na]<sup>+</sup>: 242.1151, Found: 242.1134.

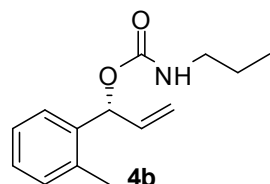

**(*R*)-1-*p*-Tolylallyl propylcarbamate (4b):** Colorless oil, 74 % yield, b/l = 92/8, 84 % *ee*. The *ee* of the product was determined by chiral HPLC. [Daicel CHIRALCEL OD-H (0.46 cm x 25 cm); hexane/2-propanol = 95/5; flow rate = 1.0 mL/min; detection

wavelength = 214 nm;  $t_R$  = 7.574 (major), 8.978 (minor) min].  $[\alpha]_D^{20}$  = +5.0° (c 0.4, CHCl<sub>3</sub>). <sup>1</sup>H NMR (400 MHz, CDCl<sub>3</sub>)  $\delta$  = 7.35-7.33 (m, 1H), 7.21-7.19 (m, 2H), 7.18-7.14 (m, 1H), 6.36 (d,  $J$  = 5.2 Hz, 1H), 6.01 (ddd,  $J$  = 16.4, 10.8, 5.6 Hz, 1H), 5.22 (d,  $J$  = 10.4 Hz, 1H), 5.21 (d,  $J$  = 17.2 Hz, 1H), 4.80 (br, 1H), 3.18-3.13 (m, 2H), 2.38 (s, 3H), 1.51 (sext,  $J$  = 7.2 Hz, 2H), 0.90 ppm (t,  $J$  = 7.2 Hz, 3H). <sup>13</sup>C NMR (100 MHz, CDCl<sub>3</sub>)  $\delta$  = 155.7, 137.5, 136.3, 135.8, 130.5, 127.8, 126.7, 126.1, 116.4, 76.6, 42.8, 23.2, 19.2, 11.2 ppm. IR(KBr):  $\nu_{\max}$  (cm<sup>-1</sup>) = 3445, 2969, 2922, 2871, 1696 (C=O), 1649, 1556, 1509, 1453, 1267, 1141, 1038, 982, 926, 731. HRMS (ESI+) calcd for C<sub>14</sub>H<sub>19</sub>NNaO<sub>2</sub> [M+Na]<sup>+</sup>: 256.1308, Found: 256.1309.

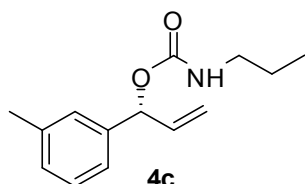

**(R)-1-*m*-Tolylallyl propylcarbamate (4c)**: Colorless oil, 72 % yield, b/l = 96/4, 85 % *ee*. The *ee* of the product was determined by chiral HPLC. [Daicel CHIRALCEL OD-H (0.46 cm x 25 cm); hexane/2-propanol = 90/10; flow rate = 1.0 mL/min; detection wavelength = 214 nm;  $t_R$  = 5.331 (major), 6.319 (minor) min].  $[\alpha]_D^{20}$  = +20.5° (c 0.6, CHCl<sub>3</sub>). <sup>1</sup>H NMR (400 MHz, CDCl<sub>3</sub>)  $\delta$  = 7.23 (d,  $J$  = 7.6 Hz, 1H), 7.15 (d,  $J$  = 8.0 Hz, 2H), 7.11 (d,  $J$  = 7.2 Hz, 1H), 6.14 (d,  $J$  = 5.6 Hz, 1H), 6.01 (ddd,  $J$  = 16.8, 10.4, 6.0 Hz, 1H), 5.30 (d,  $J$  = 17.2 Hz, 1H), 5.22 (d,  $J$  = 10.4, Hz, 1H), 4.78 (br, 1H), 3.19-3.11 (m, 2H), 2.35 (s, 3H), 1.51 (sext,  $J$  = 7.2 Hz, 2H), 0.91 ppm (t,  $J$  = 7.6 Hz, 3H). <sup>13</sup>C NMR (100 MHz, CDCl<sub>3</sub>)  $\delta$  = 155.7, 139.3, 138.1, 136.9, 128.7, 128.4, 127.7, 124.1, 116.3, 76.7, 42.8, 23.2, 21.4, 11.2 ppm. IR(KBr):  $\nu_{\max}$  (cm<sup>-1</sup>) = 3412, 2960, 2922, 2862, 1696 (C=O), 1523, 1453, 1267, 1234, 1132, 1034, 983, 922, 763, 694. HRMS (ESI+) calcd for C<sub>14</sub>H<sub>19</sub>NNaO<sub>2</sub> [M+Na]<sup>+</sup>: 256.1308, Found: 256.1325.

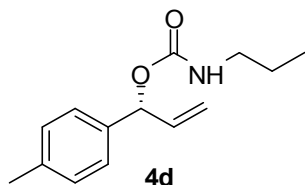

**(R)-1-*p*-Tolylallyl propylcarbamate (4d)**: Colorless oil, 48 % yield, b/l = 95/5, 90 % *ee*. The *ee* of the product was determined by chiral HPLC. [Daicel CHIRALCEL OD-H (0.46 cm x 25 cm); hexane/2-propanol = 90/10; flow rate = 1.0 mL/min; detection wavelength = 214 nm;  $t_R$  = 4.824 (minor), 5.299 (major) min].  $[\alpha]_D^{20}$  = +18.0° (c 0.5, CHCl<sub>3</sub>). <sup>1</sup>H NMR (400 MHz, CDCl<sub>3</sub>)  $\delta$  = 7.25 (d,  $J$  = 8.8 Hz, 2H), 7.16 (d,  $J$  = 8.0 Hz, 2H), 6.14 (d,  $J$  = 5.6 Hz, 1H), 6.01 (ddd,  $J$  = 16.4, 10.4, 5.6 Hz, 1H), 5.28 (d,  $J$  = 17.2 Hz, 1H), 5.22 (d,  $J$  = 10.4, Hz, 1H), 4.77 (br, 1H), 3.16-3.09 (m, 2H), 2.34 (s, 3H), 1.51 (sext,  $J$  = 7.2 Hz, 2H), 0.90 ppm (t,  $J$  = 7.2 Hz, 3H). <sup>13</sup>C NMR (100 MHz, CDCl<sub>3</sub>)  $\delta$  = 155.7, 137.8, 136.9, 136.5, 129.2, 127.1, 116.2, 76.3, 42.8, 23.2, 21.1, 11.2 ppm. IR(KBr):  $\nu_{\max}$  (cm<sup>-1</sup>) = 3477, 2964, 2922, 2848, 1715 (C=O), 1514, 1258, 1225, 1132, 1038, 982, 927, 815, 745. HRMS (ESI+) calcd for C<sub>14</sub>H<sub>19</sub>NNaO<sub>2</sub> [M+Na]<sup>+</sup>: 256.1308, Found: 256.1309.

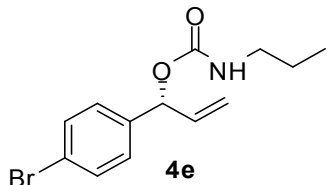

**(R)-1-(4-Bromophenyl)allyl propylcarbamate (4e)**: Colorless oil, 44 % yield, b/l = 94/6, 59 % *ee*. The *ee* of the product was determined by chiral HPLC. [Daicel CHIRALCEL OD-H (0.46 cm x 25 cm); hexane/2-propanol = 90/10; flow rate = 0.6 mL/min; detection wavelength = 214 nm;  $t_R$  = 9.894 (major), 10.346 (minor) min].  $[\alpha]_D^{20}$  = +6.6° (c 0.6, CHCl<sub>3</sub>). <sup>1</sup>H NMR (400 MHz, CDCl<sub>3</sub>)  $\delta$  = 7.48 (d,  $J$  = 8.4 Hz, 2H), 7.22 (d,  $J$  = 8.4 Hz, 2H), 6.12 (d,  $J$  = 5.6 Hz, 1H), 5.97 (ddd,  $J$  = 16.8, 10.4, 7.0 Hz, 1H), 5.28 (d,  $J$  = 17.2 Hz, 1H), 5.25 (d,  $J$  = 10.8, Hz, 1H), 4.79 (br, 1H), 3.18-3.09 (m, 2H), 1.51 (sext,  $J$  = 7.2 Hz, 2H), 0.91 ppm (t,  $J$  = 7.2 Hz, 3H). <sup>13</sup>C NMR (100 MHz, CDCl<sub>3</sub>)  $\delta$  = 155.4, 138.5, 136.3, 131.6, 128.8, 122.0, 117.0, 75.8, 42.8, 23.1, 11.2 ppm. IR(KBr):  $\nu_{\max}$  (cm<sup>-1</sup>) = 3449, 3048, 2927, 2848, 1720 (C=O), 1505, 1258, 1226, 1137, 983, 937, 820, 741. HRMS (ESI+) calcd for C<sub>13</sub>H<sub>16</sub>BrNNaO<sub>2</sub> [M+Na]<sup>+</sup>: 320.0257, Found: 320.0266.

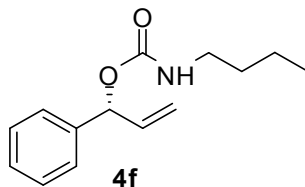

**(R)-1-Phenylallyl butylcarbamate (4f)**: Colorless oil, 52 % yield, b/l = 92/8, 94 % *ee*. The *ee* of the product was determined by chiral HPLC. [Daicel CHIRALCEL OD-H (0.46 cm x 25 cm); hexane/2-propanol = 90/10; flow rate = 1.0 mL/min; detection wavelength = 214 nm;  $t_R$  = 5.598 (major), 6.609 (minor) min].  $[\alpha]_D^{20}$  = +26.8° (c 0.5, CHCl<sub>3</sub>). <sup>1</sup>H NMR (400 MHz, CDCl<sub>3</sub>)  $\delta$  = 7.35 (d,  $J$  = 4.4 Hz, 4H), 7.32-7.27 (m 1H), 6.17 (d,  $J$  = 5.6 Hz, 1H), 6.02 (ddd,  $J$  = 16.8, 10.4, 6.0 Hz, 1H), 5.29 (d,  $J$  = 17.2 Hz, 1H), 5.24 (dd,  $J$  = 10.4, 0.8, Hz, 1H), 4.77 (br, 1H), 3.21-3.15 (m, 2H), 1.51-1.44 (m, 2H), 1.38-1.29 (m, 2H), 0.91 ppm (t,  $J$  = 7.2 Hz, 3H). <sup>13</sup>C NMR (100 MHz, CDCl<sub>3</sub>)  $\delta$  = 155.6, 139.4, 136.8, 128.5, 128.0, 127.0, 116.5, 76.4, 40.8, 32.0, 19.9, 13.7 ppm. IR(KBr):  $\nu_{max}$  (cm<sup>-1</sup>) = 3486, 2964, 2932, 2848, 1701 (C=O), 1510, 1449, 1244, 1128, 1021, 927, 736, 690. HRMS (ESI+) calcd for C<sub>14</sub>H<sub>19</sub>NNaO<sub>2</sub> [M+Na]<sup>+</sup>: 256.1308, Found: 256.1311.

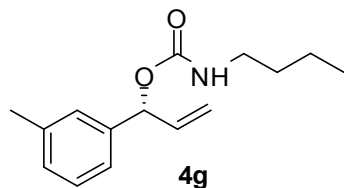

**(R)-1-*m*-Tolylallyl butylcarbamate (4g)**: Colorless oil, 47 % yield, b/l = 95/5, 83 % *ee*. The *ee* of the product was determined by chiral HPLC. [Daicel CHIRALCEL OD-H (0.46 cm x 25 cm); hexane/2-propanol = 90/10; flow rate = 1.0 mL/min; detection wavelength = 214 nm;  $t_R$  = 5.068 (major), 6.146 (minor) min].  $[\alpha]_D^{20}$  = +22.5° (c 0.4, CHCl<sub>3</sub>). <sup>1</sup>H NMR (400 MHz, CDCl<sub>3</sub>)  $\delta$  = 7.23 (d,  $J$  = 7.6 Hz, 1H), 7.15 (d,  $J$  = 8.0 Hz, 2H), 7.11 (d,  $J$  = 7.6 Hz, 1H), 6.14 (d,  $J$  = 5.6 Hz, 1H), 6.01 (ddd,  $J$  = 16.4, 10.0, 5.6 Hz, 1H), 5.29 (d,  $J$  = 16.8 Hz, 1H), 5.22 (d,  $J$  = 10.4, Hz, 1H), 4.76 (br, 1H), 3.21-3.15 (m, 2H), 2.35 (s, 3H), 1.51-1.44 (m, 2H), 1.37-1.29 (m, 2H), 0.91 ppm (t,  $J$  = 7.2 Hz, 3H). <sup>13</sup>C NMR (100 MHz, CDCl<sub>3</sub>)  $\delta$  = 155.7, 139.4, 136.2, 137.0, 128.8, 128.4, 127.8, 124.1, 116.3, 76.5, 40.8, 32.0, 21.4, 19.9, 13.7 ppm. IR(KBr):  $\nu_{max}$  (cm<sup>-1</sup>) = 3449, 3048, 2972, 2932, 2843, 1715 (C=O), 1505, 1263, 1240, 1132, 1025, 983, 932, 732. HRMS (ESI+) calcd for C<sub>15</sub>H<sub>21</sub>NNaO<sub>2</sub> [M+Na]<sup>+</sup>: 270.1465, Found: 270.1459.

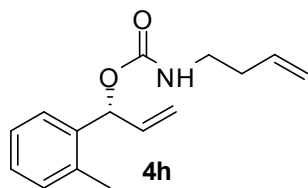

**(R)-1-*m*-Tolylallyl butylcarbamate (4h)**: Colorless oil, 50 % yield, b/l = 93/7, 93 % *ee*. The *ee* of the product was determined by chiral HPLC. [Daicel CHIRALCEL OD-H (0.46 cm x 25 cm); hexane/2-propanol = 90/10; flow rate = 1.0 mL/min; detection wavelength = 214 nm;  $t_R$  = 5.962 (major), 6.522 (minor) min].  $[\alpha]_D^{20}$  = +3.2° (c 0.5, CHCl<sub>3</sub>). <sup>1</sup>H NMR (400 MHz, CDCl<sub>3</sub>)  $\delta$  = 7.34-7.32 (m, 1H), 7.21-7.17 (m, 2H), 7.16-7.13 (m, 1H), 6.36 (d,  $J$  = 4.4 Hz, 1H), 6.00 (ddd,  $J$  = 15.6, 10.8, 5.6 Hz, 1H), 5.79-5.68 (m, 1H), 5.22 (d,  $J$  = 10.4 Hz, 1H), 5.21 (d,  $J$  = 18.0 Hz, 1H), 5.08 (d,  $J$  = 18.0 Hz, 1H), 5.09 (d,  $J$  = 8.8.0 Hz, 1H), 4.83 (br, 1H), 3.28-3.25 (m, 2H), 2.38 (s, 3H), 2.27-2.22 ppm (m, 2H). <sup>13</sup>C NMR (100 MHz, CDCl<sub>3</sub>)  $\delta$  = 155.6, 137.4, 136.2, 135.7, 135.0, 130.5, 127.9, 126.7, 126.1, 117.3, 116.5, 73.6, 40.0, 34.1, 19.2 ppm. IR(KBr):  $\nu_{max}$  (cm<sup>-1</sup>) = 3426, 3081, 2848, 1705 (C=O), 1649, 1509, 1458, 1248, 1127, 1029, 996, 912, 749. HRMS (ESI+) calcd for C<sub>15</sub>H<sub>19</sub>NNaO<sub>2</sub> [M+Na]<sup>+</sup>: 268.1308, Found: 268.1297.

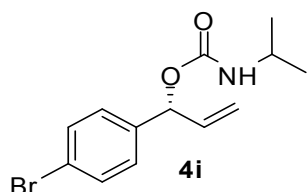

**(R)-1-(4-Bromophenyl)allyl isopropylcarbamate (4i)**: White solid. m.p. 83.7–85.5 °C. 35 % yield, b/l = 88/12, 68 % *ee*. The *ee* of the product was determined by chiral HPLC. [Daicel CHIRALPAK AD (0.46 cm x 25 cm); hexane/2-propanol = 90/10; flow rate = 1.0 mL/min; detection wavelength = 214 nm;  $t_R$  = 6.432 (major), 8.636 (minor) min].  $[\alpha]_D^{20}$  = +9.2° (c 1.1, CHCl<sub>3</sub>). <sup>1</sup>H NMR (400 MHz, CDCl<sub>3</sub>)  $\delta$  = 7.48 (d,  $J$  = 8.4 Hz, 2H), 7.22 (d,  $J$  = 8.0 Hz, 2H), 6.11 (d,  $J$  = 4.8 Hz, 1H), 5.96 (ddd,  $J$  = 16.8, 10.0, 5.6 Hz, 1H), 5.28 (d,  $J$  = 16.8 Hz, 1H), 5.24 (d,  $J$  = 10.4 Hz, 1H), 4.61 (br, 1H), 3.85-3.77 (m, 1H), 1.17 (d,  $J$  = 6.4 Hz, 3H), 1.14 ppm (d,  $J$  = 6.4 Hz, 3H). <sup>13</sup>C NMR (100 MHz, CDCl<sub>3</sub>)  $\delta$  = 154.5, 138.5, 136.4,

131.6, 128.8, 121.9, 116.9, 75.6, 43.2, 23.0 ppm. IR(KBr):  $\nu_{\max}$  (cm<sup>-1</sup>) = 3477, 3421, 2960, 2913, 1701 (C=O), 1645, 1617, 1514, 1244, 1071, 936, 619. HRMS (ESI+) calcd for C<sub>13</sub>H<sub>16</sub>BrNNaO<sub>2</sub>[M+Na]<sup>+</sup>: 320.0257, Found: 320.0255.

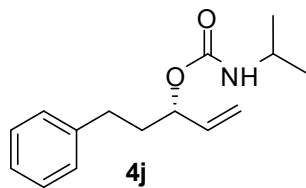

**(S)-5-Phenylpent-1-en-3-yl isopropylcarbamate (4j):** Colorless oil, 41 % yield, b/l = 99/1, 38 % *ee*. The *ee* of the product was determined by chiral HPLC. [Daicel CHIRALPAK IC (0.46 cm x 25 cm); hexane/2-propanol = 90/10; flow rate = 1.0 mL/min; detection wavelength = 214 nm;  $t_R$  = 6.106 (major), 6.958 (minor) min].  $[\alpha]_D^{20}$  = +3.5° (c 0.4, CHCl<sub>3</sub>). <sup>1</sup>H NMR (400 MHz, CDCl<sub>3</sub>)  $\delta$  = 7.35-7.27 (m, 2H), 7.19-7.17 (m, 3H), 5.82 (ddd,  $J$  = 16.8, 10.4, 7.2 Hz, 1H), 5.27 (d,  $J$  = 17.2 Hz, 1H), 5.18 (d,  $J$  = 10.4 Hz, 2H), 4.50 (br, 1H), 3.84-3.79 (m, 1H), 2.7-2.6 (m, 2H), 2.04-1.86 (m, 2H), 1.17 (d,  $J$  = 2.4 Hz, 3H), 1.15 ppm (d,  $J$  = 2.4 Hz, 3H). <sup>13</sup>C NMR (100 MHz, CDCl<sub>3</sub>)  $\delta$  = 155.1, 141.6, 137.0, 128.4, 128.3, 125.9, 116.3, 74.4, 43.0, 36.2, 31.4, 23.0 ppm. IR(KBr):  $\nu_{\max}$  (cm<sup>-1</sup>) = 3414, 3054, 2983, 2929, 2858, 1716 (C=O), 1645, 1509, 1456, 1267, 1227, 1074, 992, 931, 735. HRMS (ESI+) calcd for C<sub>15</sub>H<sub>21</sub>NNaO<sub>2</sub>[M+Na]<sup>+</sup>: 270.1465, Found: 270.1461.

**(R,E)-1-(2-(3-Chloroprop-1-enyl)phenyl)allyl propylcarbamate (4k):**

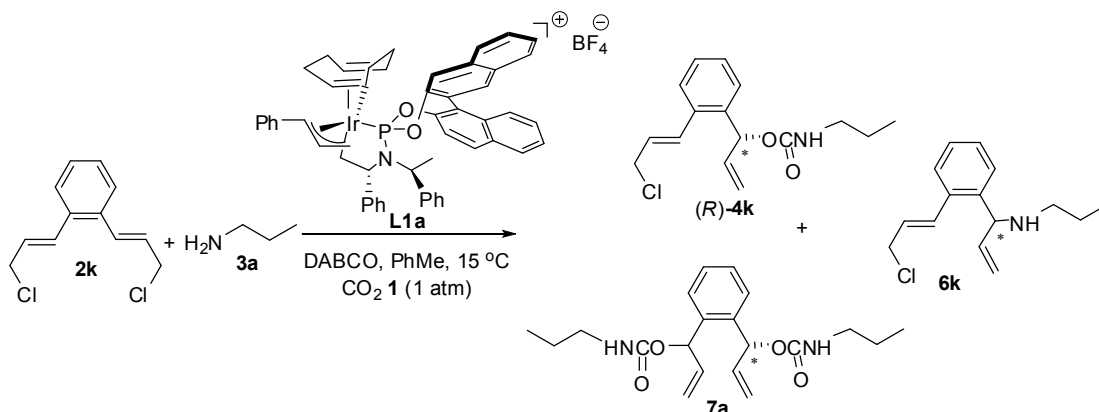

light yellow semisolid, 60 % yield, b/l = 95/5, 96 % *ee*. The *ee* of the product was determined by chiral HPLC [Daicel CHIRALCEL OD-H (0.46 cm x 25 cm); hexane/2-propanol = 90/10; flow rate = 1.0 mL/min; detection wavelength = 214 nm;  $t_R$  = 6.840 (major), 10.871 (minor) min].  $[\alpha]_D^{20}$  = +11.4° (c 0.3, CHCl<sub>3</sub>). When the same reaction with **2k** was performed using the ligand (*R,R,Ra*)-L1, (*S*)-**4k** was obtained in 56% yield with b/l 99/1 and 99% *ee*, which is determined by a chiral HPLC [Daicel CHIRALCEL OD-H (0.46 cm x 25 cm); hexane/2-propanol = 90/10; flow rate = 1.0 mL/min; detection wavelength = 214 nm;  $t_R$  = 6.840 (major), 10.871 (minor) min]. <sup>1</sup>H NMR (400 MHz, CDCl<sub>3</sub>)  $\delta$  = 7.47-7.45 (m, 1H), 7.38-7.36 (m, 1H), 7.30-7.28 (m, 2H), 7.06 (d,  $J$  = 15.6 Hz, 1H), 6.40 (d,  $J$  = 4.4 Hz, 1H), 6.17 (dt,  $J$  = 14.8, 7.2 Hz, 1H), 6.02 (ddd,  $J$  = 16.0, 10.4, 4.8 Hz, 1H), 5.23 (d,  $J$  = 10.8 Hz, 1H), 5.20 (dd,  $J$  = 16.8, 1.6 Hz, 1H), 4.79 (br, 1H), 4.25 (d,  $J$  = 7.2 Hz, 2H), 3.18-3.10 (m, 2H), 1.54-1.48 (m, 2H), 0.90 ppm (t,  $J$  = 7.6 Hz, 3H). <sup>13</sup>C NMR (100 MHz, CDCl<sub>3</sub>)  $\delta$  = 155.5, 136.8, 136.3, 134.9, 131.6, 128.3, 128.2, 127.6, 127.5, 126.9, 116.8, 73.6, 45.3, 42.8, 23.2, 11.2 ppm. IR(KBr):  $\nu_{\max}$  (cm<sup>-1</sup>) = 3473, 3412, 2964, 2913, 2843, 1710 (C=O), 1645, 1645, 1617, 1509, 1252, 745, 614, 474. HRMS (ESI+) calcd for C<sub>16</sub>H<sub>20</sub>ClNNaO<sub>2</sub>[M+Na]<sup>+</sup>: 316.1075, Found: 316.1068.

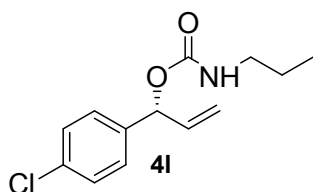

**(R)-1-(4-chlorophenyl)allyl propylcarbamate (4l):** Colorless oil, 46% yield, b/l = 90/10, 63% *ee*. The *ee* of the product was determined by HPLC. [Daicel CHIRALCEL OD-H (0.46 cm

x 25 cm); hexane/2-propanol = 90/10; flow rate = 0.7 mL/min; detection wavelength = 214 nm;  $t_R$  = 13.246 (minor), 13.997 (major) min].  $[\alpha]_D^{20} = +8.6^\circ$  (c 0.4,  $\text{CHCl}_3$ ).  $^1\text{H NMR}$  (400 MHz,  $\text{CDCl}_3$ )  $\delta$  = 7.33-7.26 (m, 4H), 6.13 (d,  $J$  = 5.2 Hz, 1H), 5.97 (ddd,  $J$  = 16.4, 10.4, 5.6 Hz, 1H), 5.28 (d,  $J$  = 17.6 Hz, 1H), 5.24 (d,  $J$  = 10.8 Hz, 1H), 4.82 (br, 1H), 3.17-3.12 (m, 2H), 1.51 (sext,  $J$  = 7.2 Hz, 2H), 0.91 (t,  $J$  = 7.2 Hz, 3H).  $^{13}\text{C NMR}$  (100 MHz,  $\text{CDCl}_3$ )  $\delta$  = 155.4, 138.0, 136.4, 133.8, 128.6, 128.4, 116.9, 75.7, 42.8, 23.1, 11.2. IR(KBr):  $\nu_{\text{max}}$  ( $\text{cm}^{-1}$ ) = 3454, 3053, 2960, 2932, 2843, 1719, 1509, 1262, 1220, 1085, 978, 931, 819, 731. HRMS (ESI+) calcd for  $\text{C}_{13}\text{H}_{16}\text{ClNNaO}_2$   $[\text{M}+\text{Na}]^+$ : 276.0762, Found: 276.0762.

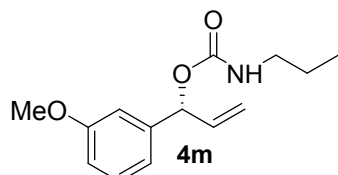

**(R)-1-(3-methoxyphenyl)allyl propylcarbamate (4m):**

Colorless oil, 51% yield, b/l = 95/5, 87% *ee*. The *ee* of the product was determined by HPLC. [Daicel CHIRALCEL OD-H (0.46 cm x 25 cm); hexane/2-propanol = 90/10; flow rate = 1.0 mL/min; detection wavelength = 214 nm;  $t_R$  = 7.490 (minor), 10.733 (major) min].  $[\alpha]_D^{20} = +10.1^\circ$  (c 0.5,  $\text{CHCl}_3$ ).  $^1\text{H NMR}$  (400 MHz,  $\text{CDCl}_3$ )  $\delta$  = 7.27 (t,  $J$  = 8.0 Hz, 1H), 6.94 (d,  $J$  = 7.2 Hz, 1H), 6.89 (s, 1H), 6.84 (dd,  $J$  = 8.0, 2.4 Hz, 1H), 6.14 (d,  $J$  = 5.6 Hz, 1H), 6.00 (ddd,  $J$  = 16.4, 10.4, 5.6 Hz, 1H), 5.30 (d,  $J$  = 16.8 Hz, 1H), 5.23 (d,  $J$  = 10.4 Hz, 1H), 4.82 (br, 1H), 3.80 (s, 1H), 3.19-3.10 (m, 2H), 1.51 (sext,  $J$  = 7.2 Hz, 2H), 0.91 (t,  $J$  = 7.2 Hz, 3H).  $^{13}\text{C NMR}$  (100 MHz,  $\text{CDCl}_3$ )  $\delta$  = 159.7, 155.6, 141.0, 136.7, 129.5, 119.3, 116.5, 113.4, 112.6, 76.4, 55.2, 42.8, 23.1, 11.2. IR(KBr):  $\nu_{\text{max}}$  ( $\text{cm}^{-1}$ ) = 3347, 2974, 2932, 1705, 1603, 1528, 1500, 1267, 1132, 982, 782, 712. HRMS (ESI+) calcd for  $\text{C}_{14}\text{H}_{19}\text{NNaO}_3$   $[\text{M}+\text{Na}]^+$ : 272.1257, Found: 272.1254.

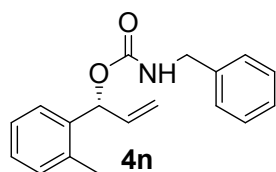

**(R)-1-o-tolylallyl benzylcarbamate (4n):**

Colorless oil, 60% yield, b/l = 94/6, 92% *ee*. The *ee* of the product was determined by HPLC. [Daicel CHIRALCEL OD-H (0.46 cm x 25 cm); hexane/2-propanol = 90/10; flow rate = 1.0 mL/min; detection wavelength = 214 nm;  $t_R$  = 7.806 (minor), 8.675 (major) min].  $[\alpha]_D^{20} = +5.0^\circ$  (c 1.0,  $\text{CHCl}_3$ ).  $^1\text{H NMR}$  (400 MHz,  $\text{CDCl}_3$ )  $\delta$  = 7.34-7.30 (m, 3H), 7.27-7.25 (m, 3H), 7.21-7.16 (m, 3H), 6.45 (d,  $J$  = 5.6 Hz, 1H), 6.01 (ddd,  $J$  = 16.4, 10.0, 5.6 Hz, 1H), 5.3 (d,  $J$  = 10.8 Hz, 1H), 5.2 (d,  $J$  = 16.4 Hz, 1H), 5.1 (br, 1H), 4.41-4.35 (m, 2H), 2.39 (s, 3H).  $^{13}\text{C NMR}$  (100 MHz,  $\text{CDCl}_3$ )  $\delta$  = 155.6, 138.3, 137.3, 136.3, 136.1, 135.5, 130.5, 128.6, 127.9, 127.5, 126.7, 126.1, 116.6, 74.0, 45.1, 19.2. IR(KBr):  $\nu_{\text{max}}$  ( $\text{cm}^{-1}$ ) = 3407, 3053, 3025, 2960, 2918, 1696, 1519, 1248, 1127, 1029, 978, 922, 754. HRMS (ESI+) calcd for  $\text{C}_{14}\text{H}_{19}\text{NNaO}_2$   $[\text{M}+\text{Na}]^+$ : 301.1308, Found: 301.1317.

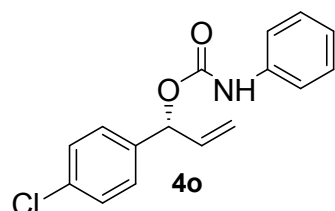

**(R)-1-(4-chlorophenyl)allyl phenylcarbamate (4o):**

Aniline **3f** was used in this reaction under the optimized reaction conditions, but failed to give the corresponding allyl carbamate **4o**.

**Synthesis of Cinnamyl propylcarbamate 5a<sup>[5]</sup>:**

An oven-dried 25 mL round bottom flask was sequentially charged with a stir bar, the allyl alcohol (0.5 mmol) and  $\text{CH}_2\text{Cl}_2$  (3 mL). To the mixture was added propyl isocyanate (2.5 mmol) dropwise at 0 °C. The reaction mixture was allowed to warm to room temperature and stir overnight. Then diluted with  $\text{H}_2\text{O}$ , the aqueous layer was

extracted with CH<sub>2</sub>Cl<sub>2</sub> twice and the combined organic layers were dried over Na<sub>2</sub>SO<sub>4</sub>, filtered, and concentrated in vacuo. Purification by flash chromatography provided the cinnamyl propylcarbamate **5a** (82 mg, 75 % yield).

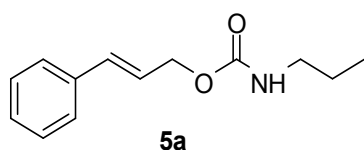

**5a**: White solid, m.p. 47.1–48.0 °C, 75 % yield. <sup>1</sup>H NMR (400 MHz, CDCl<sub>3</sub>) δ = 7.39 (d, *J* = 7.2 Hz, 2H), 7.30 (dd, *J* = 7.6, 7.2 Hz, 2H), 7.27–7.23 (m, 1H), 6.64 (d, *J* = 16.0 Hz, 1H), 6.29 (dt, *J* = 15.6, 6.4 Hz, 1H), 4.72 (d, *J* = 6.0 Hz, 3H), 3.19–3.14 (m, 2H), 1.53 (sext, *J* = 7.2 Hz, 2H), 0.93 ppm (t, *J* = 7.2 Hz, 3H). <sup>13</sup>C NMR (100 MHz, CDCl<sub>3</sub>) δ = 156.3, 136.4, 133.5, 128.5, 127.9, 126.6, 124.1, 65.2, 42.8, 23.2, 11.2 ppm.

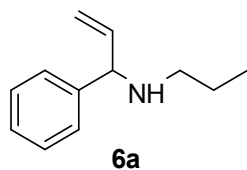

**1-Phenyl-N-propylprop-2-en-1-amine (6a)**<sup>[6]</sup>: Colorless oil, 13 % yield. <sup>1</sup>H NMR (400 MHz, CDCl<sub>3</sub>) δ = 7.34–7.30(m, 4H), 7.26–7.22 (m, 1H), 5.93 (ddd, *J* = 17.2, 10.0, 7.2 Hz, 1H), 5.20 (d, *J* = 16.8 Hz, 1H), 5.09 (d, *J* = 10.0 Hz, 1H), 4.17 (d, *J* = 7.2 Hz, 1H), 2.59–2.53 (m, 1H), 2.49–2.42 (m, 1H), 1.51 (sext, *J* = 7.2 Hz, 2H), 1.40 (br, 1H), 0.90 ppm (t, *J* = 7.2 Hz, 3H).

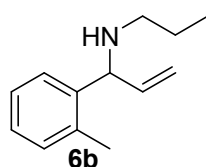

**N-Propyl-1-o-tolylprop-2-en-1-amine (6b)**: Colorless oil, 11 % yield. <sup>1</sup>H NMR (400 MHz, CDCl<sub>3</sub>) δ = 7.43 (d, *J* = 7.6 Hz, 1H), 7.23–7.19 (m, 1H), 7.15–7.13 (m, 2H), 5.87 (ddd, *J* = 17.2, 10.0, 7.2 Hz, 1H), 5.15 (d, *J* = 17.2 Hz, 1H), 5.09 (d, *J* = 10.4 Hz, 1H), 4.40 (d, *J* = 7.2 Hz, 1H), 2.60–2.54 (m, 1H), 2.50–2.44 (m, 1H), 2.35 (s, 3H), 1.59 (br, 1H), 1.55–1.49(m, 2H), 0.91 ppm (t, *J* = 7.2 Hz, 3H). <sup>13</sup>C NMR (100 MHz, CDCl<sub>3</sub>) δ = 140.7, 140.2, 135.7, 130.4, 126.7, 126.3, 126.2, 114.9, 61.8, 49.7, 23.3, 19.3, 11.8 ppm. IR(KBr): ν<sub>max</sub> (cm<sup>-1</sup>) = 3412, 3086, 2955, 2918, 2848, 1635, 1621, 1458, 1267, 1118, 908, 759. HRMS (ESI+) calcd for C<sub>13</sub>H<sub>20</sub>N [M+H]<sup>+</sup>: 190.1590, Found: 190.1586.

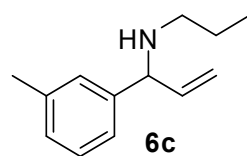

**N-Propyl-1-m-tolylprop-2-en-1-amine (6c)**: Colorless oil, 17 % yield. <sup>1</sup>H NMR (400 MHz, CDCl<sub>3</sub>) δ = 7.22 (dd, *J* = 7.2, 7.6 Hz, 2H), 7.15–7.12 (m, 2H), 7.06 (d, *J* = 7.2 Hz, 1H), 5.93 (ddd, *J* = 17.2, 10.4, 7.2 Hz, 1H), 5.20 (d, *J* = 17.2 Hz, 1H), 5.08 (d, *J* = 10.4 Hz, 1H), 4.14 (d, *J* = 6.8 Hz, 1H), 2.59–2.53 (m, 1H), 2.49–2.43 (m, 1H), 2.34 (s, 3H), 1.56–1.47 (m, 3H), 0.90 ppm (t, *J* = 7.2 Hz, 3H). <sup>13</sup>C NMR (100 MHz, CDCl<sub>3</sub>) δ = 143.0, 141.2, 138.1, 128.4, 127.9, 124.3, 114.7, 114.0, 66.2, 49.5, 23.2, 21.4, 11.8 ppm. IR(KBr): ν<sub>max</sub> (cm<sup>-1</sup>) = 3403, 3226, 2918, 2843, 1640, 1621, 1463, 628. HRMS (ESI+) calcd for C<sub>13</sub>H<sub>20</sub>N [M+H]<sup>+</sup>: 190.1590, Found: 190.1588.

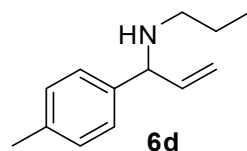

**N-Propyl-1-p-tolylprop-2-en-1-amine (6d)**: Colorless oil, 15 % yield. <sup>1</sup>H NMR (400 MHz, CDCl<sub>3</sub>) δ = 7.22 (d, *J* = 8.0 Hz, 2H), 7.14 (d, *J* = 7.6 Hz, 2H), 5.92 (ddd, *J* = 17.2, 10.0, 7.2 Hz, 1H), 5.18 (d, *J* = 17.2 Hz, 1H), 5.07 (d, *J* = 10.4 Hz, 1H), 4.14 (d, *J* = 7.6 Hz, 1H), 2.58–2.52 (m, 1H), 2.49–2.42 (m, 1H), 2.33 (s, 3H), 1.56–1.44 (m, 3H), 0.89 ppm (t, *J* = 7.2 Hz, 3H). <sup>13</sup>C NMR (100 MHz, CDCl<sub>3</sub>) δ = 141.3, 140.0, 136.7, 129.2, 127.1, 114.6, 65.9, 49.5, 23.2, 21.1, 11.8 ppm. IR(KBr): ν<sub>max</sub> (cm<sup>-1</sup>) = 3440, 2922, 2843, 1635, 1463, 1374, 1188, 959, 824, 600. HRMS (ESI+) calcd for C<sub>13</sub>H<sub>20</sub>N [M+H]<sup>+</sup>: 190.1590, Found: 190.1585.

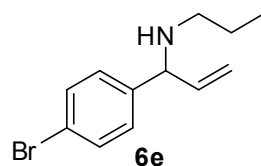

**1-(4-Bromophenyl)-*N*-propylprop-2-en-1-amine (6e)**: Colorless oil, 11 % yield. <sup>1</sup>H NMR (400 MHz, CDCl<sub>3</sub>) δ = 7.45 (d, *J* = 8.0 Hz, 2H), 7.23 (d, *J* = 8.0 Hz, 2H), 5.87 (ddd, *J* = 17.2, 10.0, 7.2 Hz, 1H), 5.19 (d, *J* = 17.2 Hz, 1H), 5.10 (d, *J* = 10.0 Hz, 1H), 4.15 (d, *J* = 7.2 Hz, 1H), 2.57-2.51 (m, 1H), 2.46-2.39 (m, 1H), 1.82 (br, 1H), 1.50 (sext, *J* = 6.8 Hz, 2H), 0.90 ppm (t, *J* = 7.2 Hz, 3H). <sup>13</sup>C NMR (100 MHz, CDCl<sub>3</sub>) δ = 142.0, 140.6, 131.5, 129.0, 120.8, 115.3, 65.5, 49.4, 23.2, 11.7 ppm. IR(KBr): ν<sub>max</sub> (cm<sup>-1</sup>) = 3650, 3076, 2955, 2918, 2857, 1654, 1463, 1383, 1006, 922, 824, 749, 521. MS (EI+, *m/z*, rel. intensity) 116 (100), 253 (M<sup>+</sup>). HRMS (EI+) calcd for C<sub>12</sub>H<sub>16</sub>NBr (M<sup>+</sup>): 253.0466, Found: 253.0463.

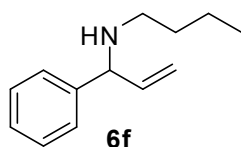

***N*-(1-Phenylallyl)butan-1-amine (6f)**<sup>[7]</sup>: Colorless oil, 16 % yield. <sup>1</sup>H NMR (400 MHz, CDCl<sub>3</sub>) δ = 7.34-7.32 (m, 4H), 7.27-7.22 (m, 1H), 5.93 (ddd, *J* = 17.2, 10.0, 7.2 Hz, 1H), 5.20 (dd, *J* = 16.8, 1.2 Hz, 1H), 5.09 (dd, *J* = 10.0, 1.2 Hz, 1H), 4.17 (d, *J* = 7.2 Hz, 1H), 2.62-2.56 (m, 1H), 2.52-2.45 (m, 1H), 1.52-1.42 (m, 2H), 1.37-1.29 (m, 3H), 0.89 ppm (t, *J* = 7.2 Hz, 3H). <sup>13</sup>C NMR (100 MHz, CDCl<sub>3</sub>) δ = 143.1, 141.3, 128.5, 127.2, 127.1, 114.7, 66.3, 47.4, 32.3, 20.5, 14.0 ppm. IR(KBr): ν<sub>max</sub> (cm<sup>-1</sup>) = 3477, 2950, 2922, 2853, 1645, 1459, 1114, 918, 704, 615.

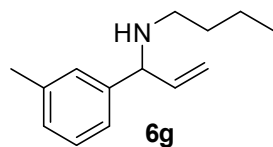

***N*-(1-*m*-Tolylallyl)butan-1-amine (6g)**: Colorless oil, 10 % yield. <sup>1</sup>H NMR (400 MHz, CDCl<sub>3</sub>) δ = 7.22 (dd, *J* = 7.6, 7.2 Hz, 1H), 7.15-7.11 (m, 2H), 7.06 (d, *J* = 7.2 Hz, 1H), 5.92 (ddd, *J* = 17.2, 10.4, 7.2 Hz, 1H), 5.20 (d, *J* = 17.2 Hz, 1H), 5.08 (d, *J* = 10.0 Hz, 1H), 4.13 (d, *J* = 6.8 Hz, 1H), 2.62-2.56 (m, 1H), 2.52-2.46 (m, 1H), 2.34 (s, 3H), 1.52-1.44 (m, 2H), 1.37-1.29 (m, 3H), 0.89 ppm (t, *J* = 7.2 Hz, 3H). <sup>13</sup>C NMR (100 MHz, CDCl<sub>3</sub>) δ = 143.1, 141.3, 138.1, 128.4, 127.9, 127.8, 124.3, 114.7, 66.3, 47.4, 32.3, 21.4, 20.5, 14.0 ppm. IR(KBr): ν<sub>max</sub> (cm<sup>-1</sup>) = 3463, 3025, 2960, 2927, 2848, 1641, 1454, 1123, 918, 733, 616. HRMS (ESI+) calcd for C<sub>14</sub>H<sub>22</sub>N [M+H]<sup>+</sup>: 204.1747, Found: 204.1747.

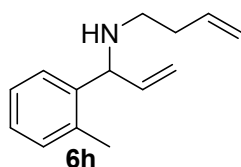

***N*-(1-*o*-Tolylallyl)but-3-en-1-amine (6h)**: Colorless oil, 10 % yield. <sup>1</sup>H NMR (400 MHz, CDCl<sub>3</sub>) δ = 7.41 (d, *J* = 7.6 Hz, 2H), 7.23-7.19 (m, 1H), 7.15-7.13 (m, 1H), 5.90 (ddd, *J* = 17.2, 10.0, 7.2 Hz, 1H), 5.82-5.72 (m, 1H), 5.15 (d, *J* = 17.2 Hz, 1H), 5.09 (d, *J* = 10.4 Hz, 1H), 5.08 (d, *J* = 17.2 Hz, 1H), 5.03 (d, *J* = 10.0 Hz, 1H), 4.21 (d, *J* = 6.8 Hz, 1H), 2.71-2.65 (m, 1H), 2.61-2.55 (m, 1H), 2.34 (s, 3H), 2.29-2.24 ppm (m, 2H). <sup>13</sup>C NMR (100 MHz, CDCl<sub>3</sub>) δ = 140.6, 140.1, 136.5, 135.3, 130.4, 126.7, 126.3, 126.2, 116.3, 115.0, 61.7, 46.6, 34.3, 19.3 ppm. IR(KBr): ν<sub>max</sub> (cm<sup>-1</sup>) = 3408, 3076, 2922, 2848, 1645, 1607, 1458, 926, 745, 614. HRMS (ESI+) calcd for C<sub>14</sub>H<sub>20</sub>N [M+H]<sup>+</sup>: 202.1590, Found: 202.1589.

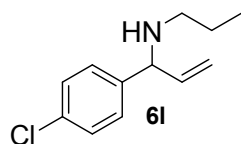

**1-(4-chlorophenyl)-*N*-propylprop-2-en-1-amine (6l)**: Colorless oil, 9% yield. <sup>1</sup>H NMR (400 MHz, CDCl<sub>3</sub>) δ = 7.29-7.26 (m, 4H), 5.87 (ddd, *J* = 17.2, 10.0, 7.2 Hz, 1H), 5.19 (d, *J* = 17.2 Hz, 1H), 5.09 (d, *J* = 10.0 Hz, 1H), 4.15 (d, *J* = 7.2 Hz, 1H), 2.57-2.50 (m, 1H), 2.46-2.39 (m, 1H), 1.53-1.47 (m, 3H), 0.90 (t, *J* = 7.2 Hz, 3H). <sup>13</sup>C NMR (100 MHz, CDCl<sub>3</sub>) δ = 141.6, 140.9, 132.7, 128.6, 128.5, 115.1, 65.5, 49.5, 23.2, 11.8. IR(KBr): ν<sub>max</sub> (cm<sup>-1</sup>) = 3431, 3086, 2964, 2927, 2871, 1486, 1388, 1094, 1020, 1006, 917, 829, 516. HRMS (EI+) calcd for C<sub>12</sub>H<sub>16</sub>NCl [M]<sup>+</sup>: 209.0971, Found: 209.0965.

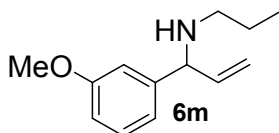

**1-(3-methoxyphenyl)-*N*-propylprop-2-en-1-amine (6m)**: Colorless oil, 11% yield. <sup>1</sup>H NMR (400 MHz, CDCl<sub>3</sub>) δ = 7.24 (dd, *J* = 8.0, 7.6 Hz, 1H), 6.93-6.91 (m, 2H), 6.79 (dd, *J* = 8.0, 1.2



Hz, 1H), 5.92 (ddd,  $J = 17.2, 10.4, 7.6$  Hz, 1H), 5.20 (d,  $J = 16.8$  Hz, 1H), 5.08 (d,  $J = 10.0$  Hz, 1H), 4.15 (d,  $J = 7.2$  Hz, 1H), 3.81 (s, 1H), 2.59-2.52 (m, 1H), 2.49-2.43 (m, 1H), 1.54-1.46 (m, 3H), 0.90 (t,  $J = 7.2$  Hz, 3H).  $^{13}\text{C}$  NMR (100 MHz,  $\text{CDCl}_3$ )  $\delta = 159.8, 144.9, 141.1, 129.4, 119.6, 114.8, 112.7, 112.5, 66.2, 55.2, 49.5, 23.3, 11.8$ . IR(KBr):  $\nu_{\text{max}}$  ( $\text{cm}^{-1}$ ) = 3319, 2960, 2927, 2876, 2829, 1603, 1467, 1383, 1262, 1052, 922, 782, 703. HRMS (EI+) calcd for  $\text{C}_{13}\text{H}_{18}\text{NO}$   $[\text{M}-\text{H}]^+$ : 204.1388, Found: 204.1391.

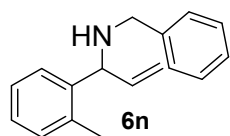

***N*-benzyl-1-*o*-tolylprop-2-en-1-amine (6n)**: Colorless oil, 12% yield.  $^1\text{H}$  NMR (400 MHz,  $\text{CDCl}_3$ )  $\delta = 7.51$  (d,  $J = 6.0$  Hz, 1H), 7.33-7.29 (m, 4H), 7.27-7.21 (m, 2H), 7.17-7.12 (m, 2H), 5.90 (ddd,  $J = 13.6, 8.0, 5.6$  Hz, 1H), 5.18 (d,  $J = 14.8$  Hz, 1H), 5.12 (d,  $J = 8.4$  Hz, 1H), 4.44 (d,  $J = 6.0$  Hz, 1H), 3.73 (d,  $J = 6.0$  Hz, 2H), 2.26 (s, 3H), 1.60 (br, 1H).  $^{13}\text{C}$  NMR (100 MHz,  $\text{CDCl}_3$ )  $\delta = 140.5, 140.4, 140.0, 135.9, 130.4, 128.4, 128.2, 126.9, 126.8, 126.4, 126.3, 115.2, 60.8, 51.4, 19.2$ . IR(KBr):  $\nu_{\text{max}}$  ( $\text{cm}^{-1}$ ) = 3412, 3225, 1612, 1556, 922, 609. HRMS (ESI+) calcd for  $\text{C}_{13}\text{H}_{18}\text{NO}$   $[\text{M}+\text{Na}]^+$ : 260.1410, Found: 204.1417.

### Synthesis of the branched allylic compound **7k**<sup>[8]</sup>:

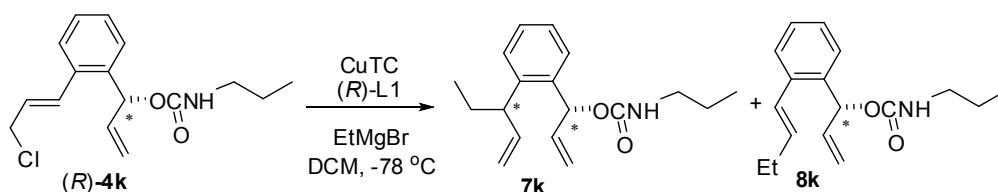

$\text{CuTC}$  (0.0075 mmol, 7.5 mol %), phosphoramidite ligand *anti*-L1 [*O,O'*-(*R*)-(1,1'-dinaphthyl-2,2'-diyl)-*N,N'*-di-(*R,R*)-[phenylethylphosphoramidite)] (0.0083 mmol, 8.3 mol %) were dissolved in DCM (0.5 mL) in a dry Schlenk tube filled with argon. The mixture was stirred at room temperature for 10 min. The allyl chloride **4k** (0.1 mmol in 0.5 mL DCM) was added dropwise and the reaction mixture was stirred at room temperature for an additional 5 min before cooling the reaction mixture to  $-78$  °C using an ethyl acetate/dry ice cold bath. The Grignard reagent (3 M in diethyl ether, 1.2 equiv) was added manually over a 20 min period. Once the addition was completed, the reaction mixture was left at  $-78$  °C for an additional 4h. The reaction was quenched by addition of aqueous hydrochloric acid (1 M, 3 mL). Diethyl ether (5 mL) was added and the aqueous phase was separated and extracted with diethyl ether ( $3 \times 5$  mL). The combined organic fractions were washed with brine (5 mL), dried over anhydrous sodium sulfate, filtered, and concentrated in vacuo. The crude residue was purified by flash column chromatography (hexane/ethyl acetate) to give an inseparable mixture of the branched product **7k** and linear product **8k**. (*R*)-1-(2-((*S*)-Pent-1-en-3-yl)phenyl)allyl propylcarbamate (**7k**): light yellow oil, 51 % yield, b/l = 84/16, 98 % *ee*, *dr* 3.1:1. The *ee* of **7k** was determined by HPLC. [Daicel CHIRALCEL OD-H (0.46 cm x 25 cm); hexane/2-propanol = 98/2; flow rate = 0.5 mL/min; detection wavelength = 214 nm;  $t_{\text{R}} = 15.401$  (major), 16.847 (minor) min].  $[\alpha]_{\text{D}}^{20} = +33.9^\circ$  (c 0.3,  $\text{CHCl}_3$ ).  $^1\text{H}$  NMR (400 MHz,  $\text{CDCl}_3$ )  $\delta = 7.36$  (d,  $J = 7.2$  Hz, 1H), 7.30 (d,  $J = 8.0$  Hz, 1H), 7.26-7.19 (m, 2H), 6.52 (d,  $J = 4.0$  Hz, 1H), 6.03 (ddd,  $J = 17.2, 10.8, 4.8$  Hz, 1H), 5.92 (ddd,  $J = 17.2, 10.4, 7.2$ , Hz, 1H), 5.22 (d,  $J = 10.8$ , Hz, 1H), 5.19 (d,  $J = 17.2$  Hz, 1H), 5.15 (d,  $J = 10.0$  Hz, 1H), 4.97 (d,  $J = 16.8$  Hz, 1H), 4.77 (br, 1H), 3.62-3.56 (m, 1H), 3.17-3.12 (m, 2H), 1.80-1.72 (m, 2H), 1.56-1.47(m, 2H), 0.93-0.86 ppm (m, 6H); **8k** :  $^1\text{H}$  NMR  $\delta = 7.43$  (d,  $J = 6.8$  Hz, 1H), 6.73 (d,  $J = 15.6$  Hz, 1H), 6.46 (d,  $J = 5.2$  Hz, 1H), 6.11-6.09 (m, 1H), 2.23-2.18 ppm (m, 1H).  $^{13}\text{C}$  NMR (100 MHz,  $\text{CDCl}_3$ )  $\delta = 155.6, 142.3, 142.0, 137.0, 136.9, 136.6, 128.2, 128.0, 127.6, 127.1, 126.5, 126.1, 116.0, 114.5, 72.9, 45.7, 42.8, 35.3, 28.5, 23.2, 22.5, 13.7, 12.1, 11.2$  ppm. IR(KBr):  $\nu_{\text{max}}$  ( $\text{cm}^{-1}$ ) = 3412, 3072, 2960, 2922, 2871,

1701 (C=O), 1631, 1509, 1262, 1230, 1141, 1038, 982, 917, 754, 619. HRMS (ESI+) calcd for C<sub>18</sub>H<sub>25</sub>NNaO<sub>2</sub> [M+Na]<sup>+</sup>: 310.1778, Found: 310.1780.

Controlling experiment 1:

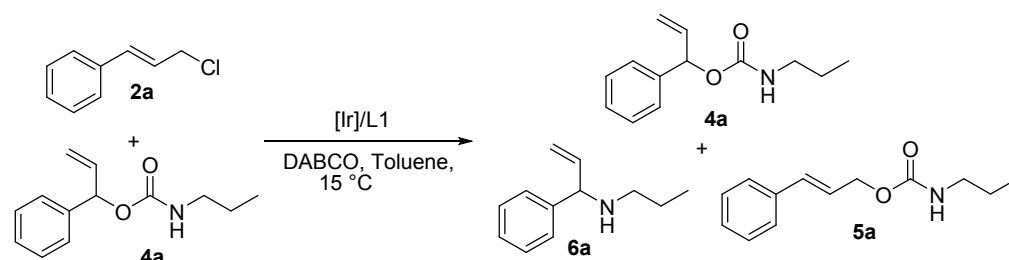

[Ir(COD)Cl]<sub>2</sub> (0.008 mmol, 4 mol %), phosphoramidite ligand L1 (0.016 mmol, 8 mol %) were dissolved in THF (0.5 mL) and propylamine (0.3 mL) in a dry Schlenk tube filled with argon. The reaction mixture was heated at 50 °C for 30 min, and then the volatile solvents were removed under vacuum to give a yellow solid. After that, allylic carbonate **2a** (0.04 mmol), **4a** (0.2 mmol), DABCO (0.4 mmol), and toluene (2.0 mL) were added. The reaction was stirring at 15 °C in 2 h. Then the reaction mixture was filtrated with celite and the solvents were removed under reduced pressure. The organic layer was evaporated to give the crude products. <sup>1</sup>H NMR analysis of the crude products showed that **4a/6a** is in a ratio of 15/1.

Controlling experiment 2:

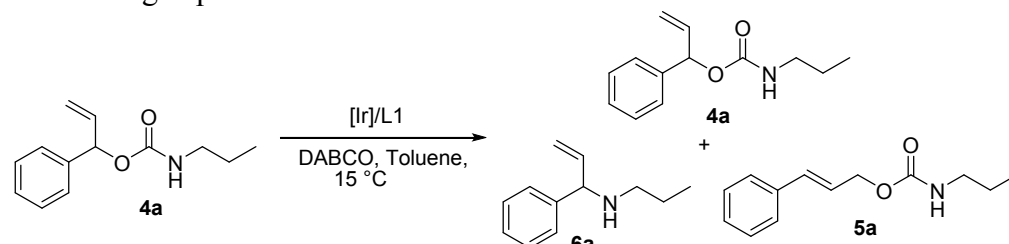

[Ir(COD)Cl]<sub>2</sub> (0.008 mmol, 4 mol %), phosphoramidite ligand L1 (0.016 mmol, 8 mol %) were dissolved in THF (0.5 mL) and propylamine (0.3 mL) in a dry Schlenk tube filled with argon. The reaction mixture was heated at 50 °C for 30 min, and then the volatile solvents were removed under vacuum to give a yellow solid. After that, **4a** (0.2 mmol), DABCO (0.4 mmol), and toluene (2.0 mL) were added. The reaction was stirring at 15 °C in 2 h. Then the reaction mixture was filtrated with celite and the solvents were removed under reduced pressure. The organic layer was evaporated to give the crude products. <sup>1</sup>H NMR analysis of the crude products showed that **4a/6a** is in a ratio of 5/1.

## References:

- [1] a) A. Alexakis, S. Rosset, J. Allamand, S. March, F. Guillen, C. Benhaim, *Synlett* **2001**, 9, 1375; b) R. Naasz, L. A. Arnold, A. J. Minnaard, B. L. Feringa, *Angew. Chem. Int. Ed.* **2001**, 40, 927; c) K. Tissot-Croset, D. Polet, A. Alexakis, *Synthesis* **2004**, 15, 2586.
- [2] M. Yan, L. W. Yang, K. Y. Wong, A. S. C. Chan, *Chem. Commun.* **1999**, 11.
- [3] L. Brozek, A. M. J. Ardolino, J. P. Morken, *J. Am. Chem. Soc.*, **2011**, 133, 16778.
- [4] N. Darby, T. M. Cresp, F. Sondheimer, *J. Org. Chem.* **1997**, 42, 1960.
- [5] L. W. Fancher, *Ger. Offen.* DE 1916971 A 1969 1106, 1969.
- [6] D. Marković, J. F. Hartwig, *J. Am. Chem. Soc.* **2007**, 129, 11680.

- [7] R. Takeuchi, N. Ue, K. Tanabe, K. Yamashita, N. Shiga, *J. Am. Chem. Soc.* **2001**, *123*, 9525.
- [8] H. Li, A. Alexakis, *Angew. Chem. Int. Ed.* **2012**, *51*, 1055.

# NMR Spectra of the compounds 2k, 4, 5, 6 and 7k

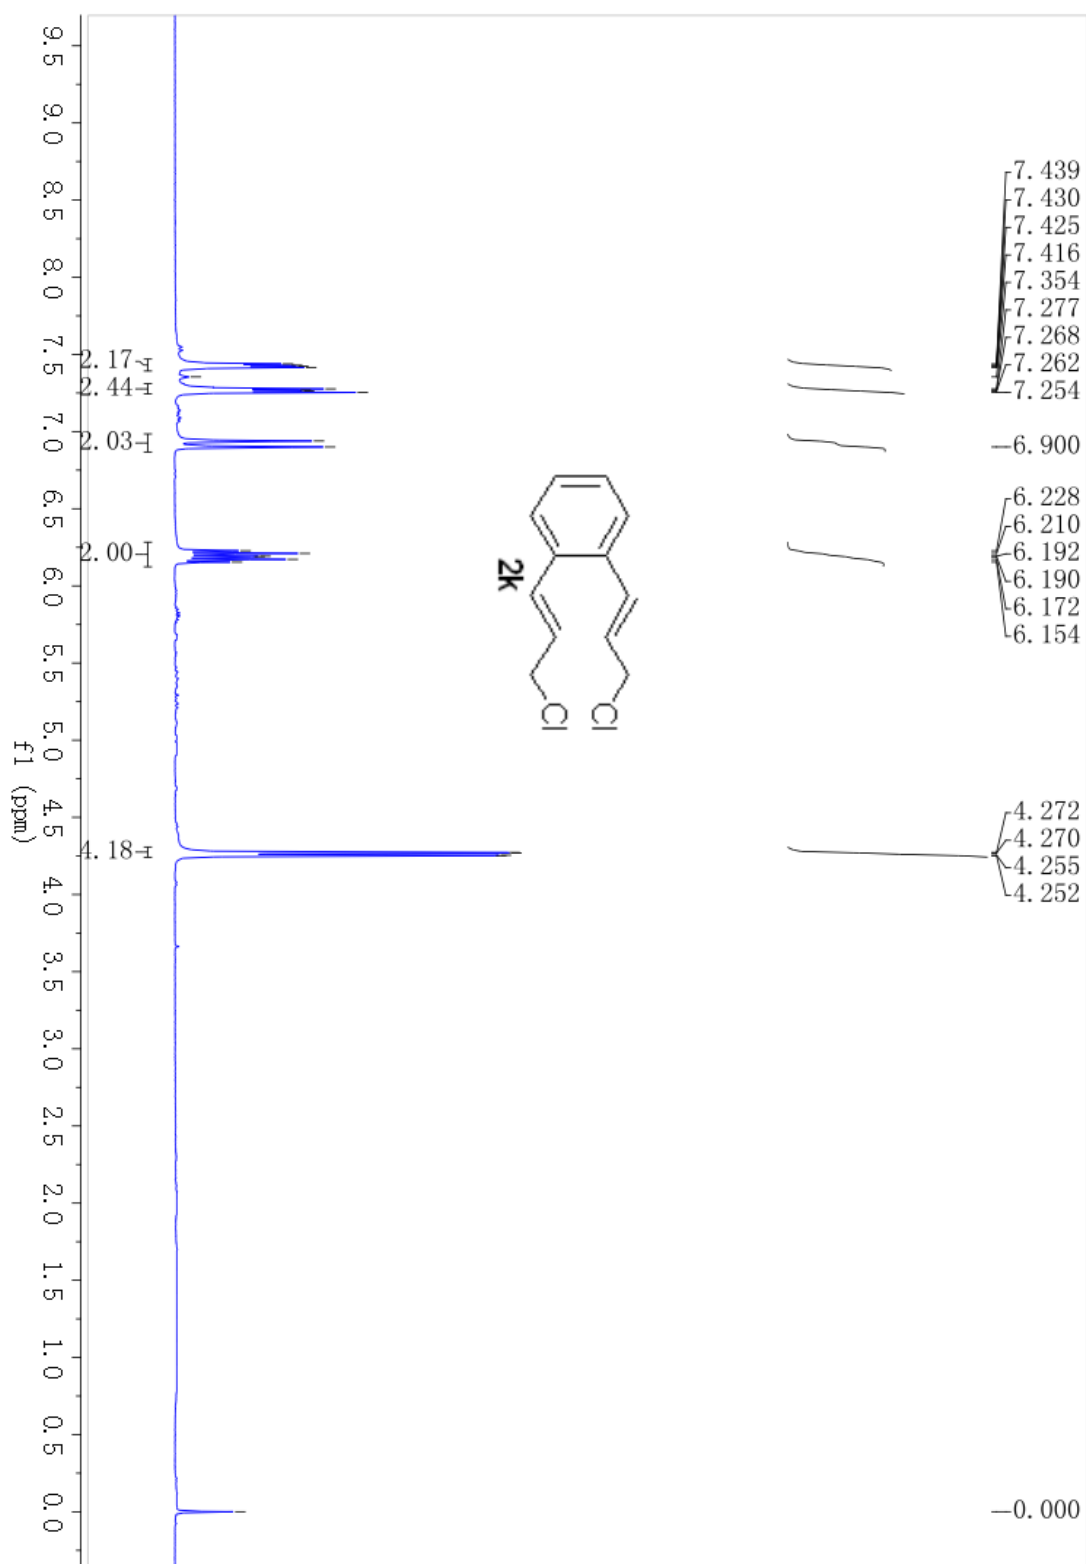

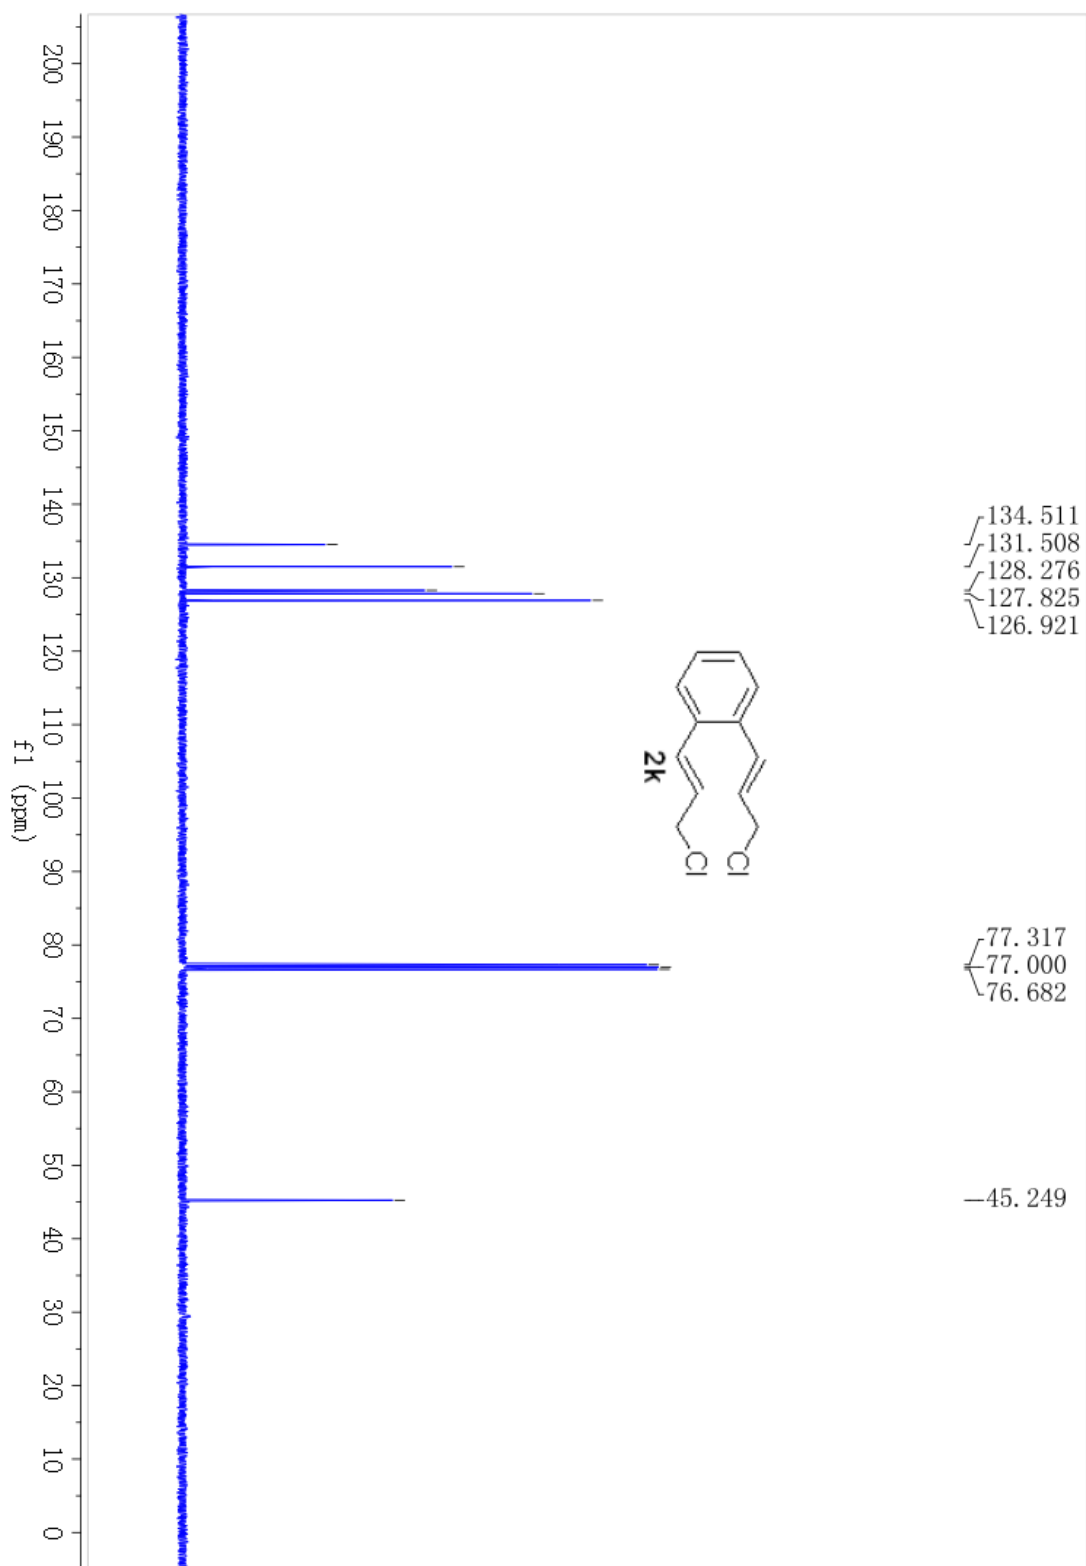

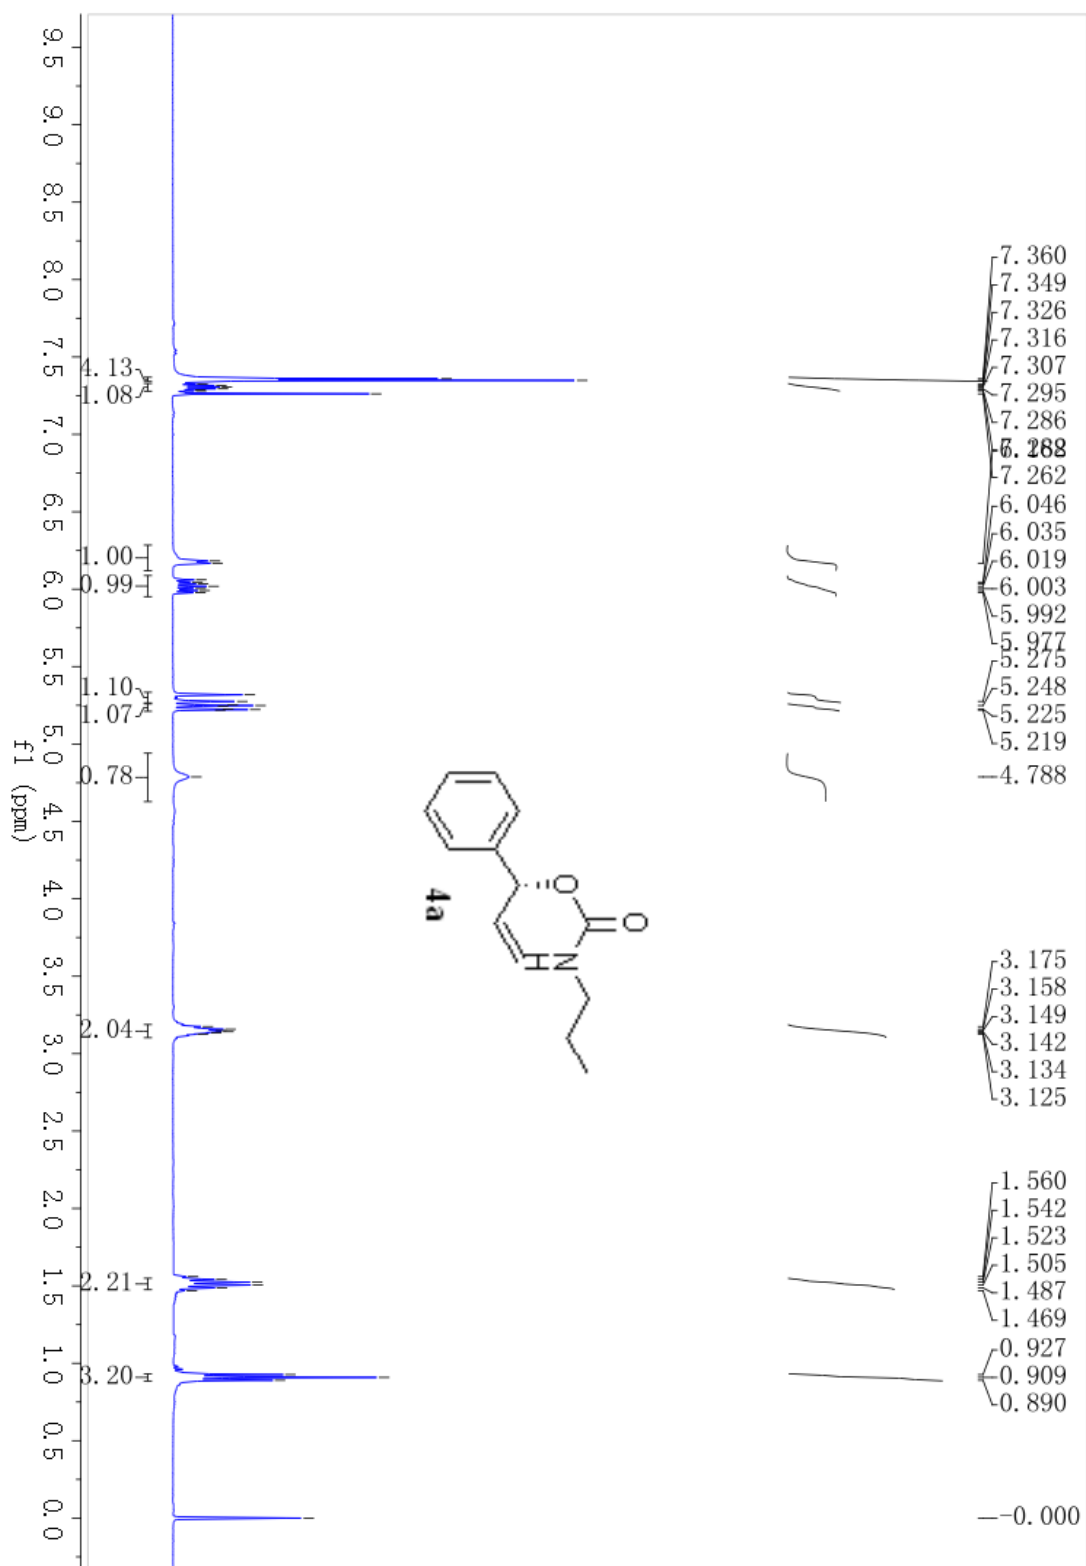

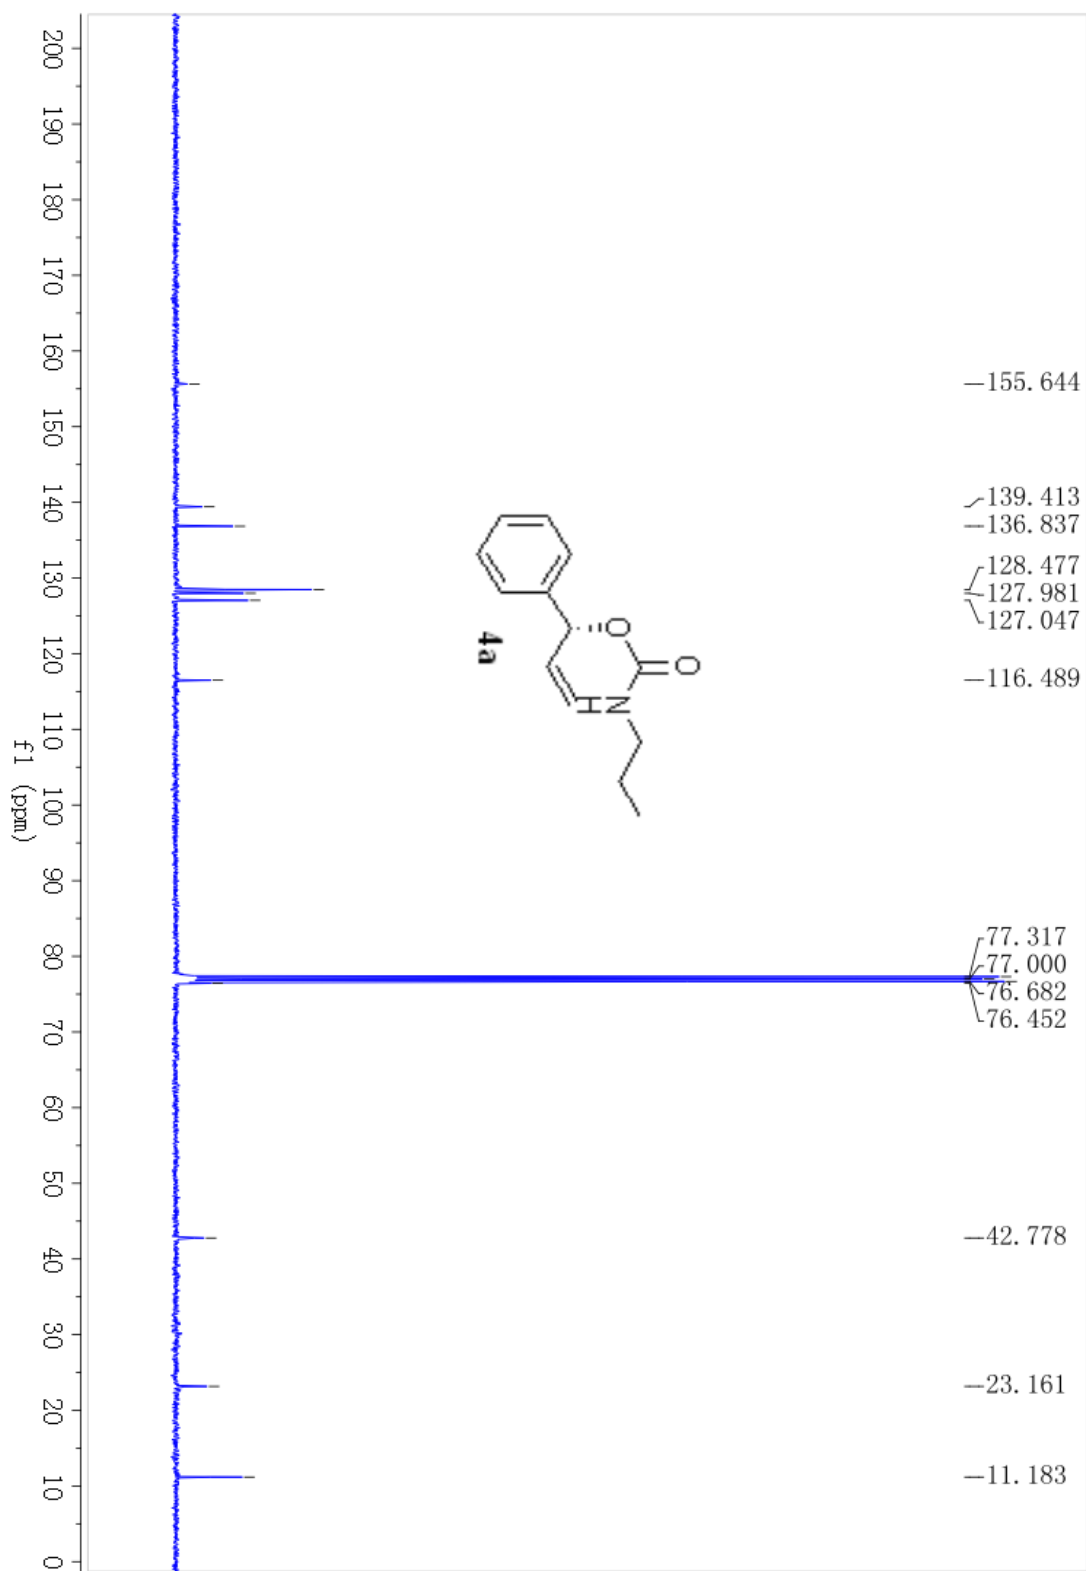

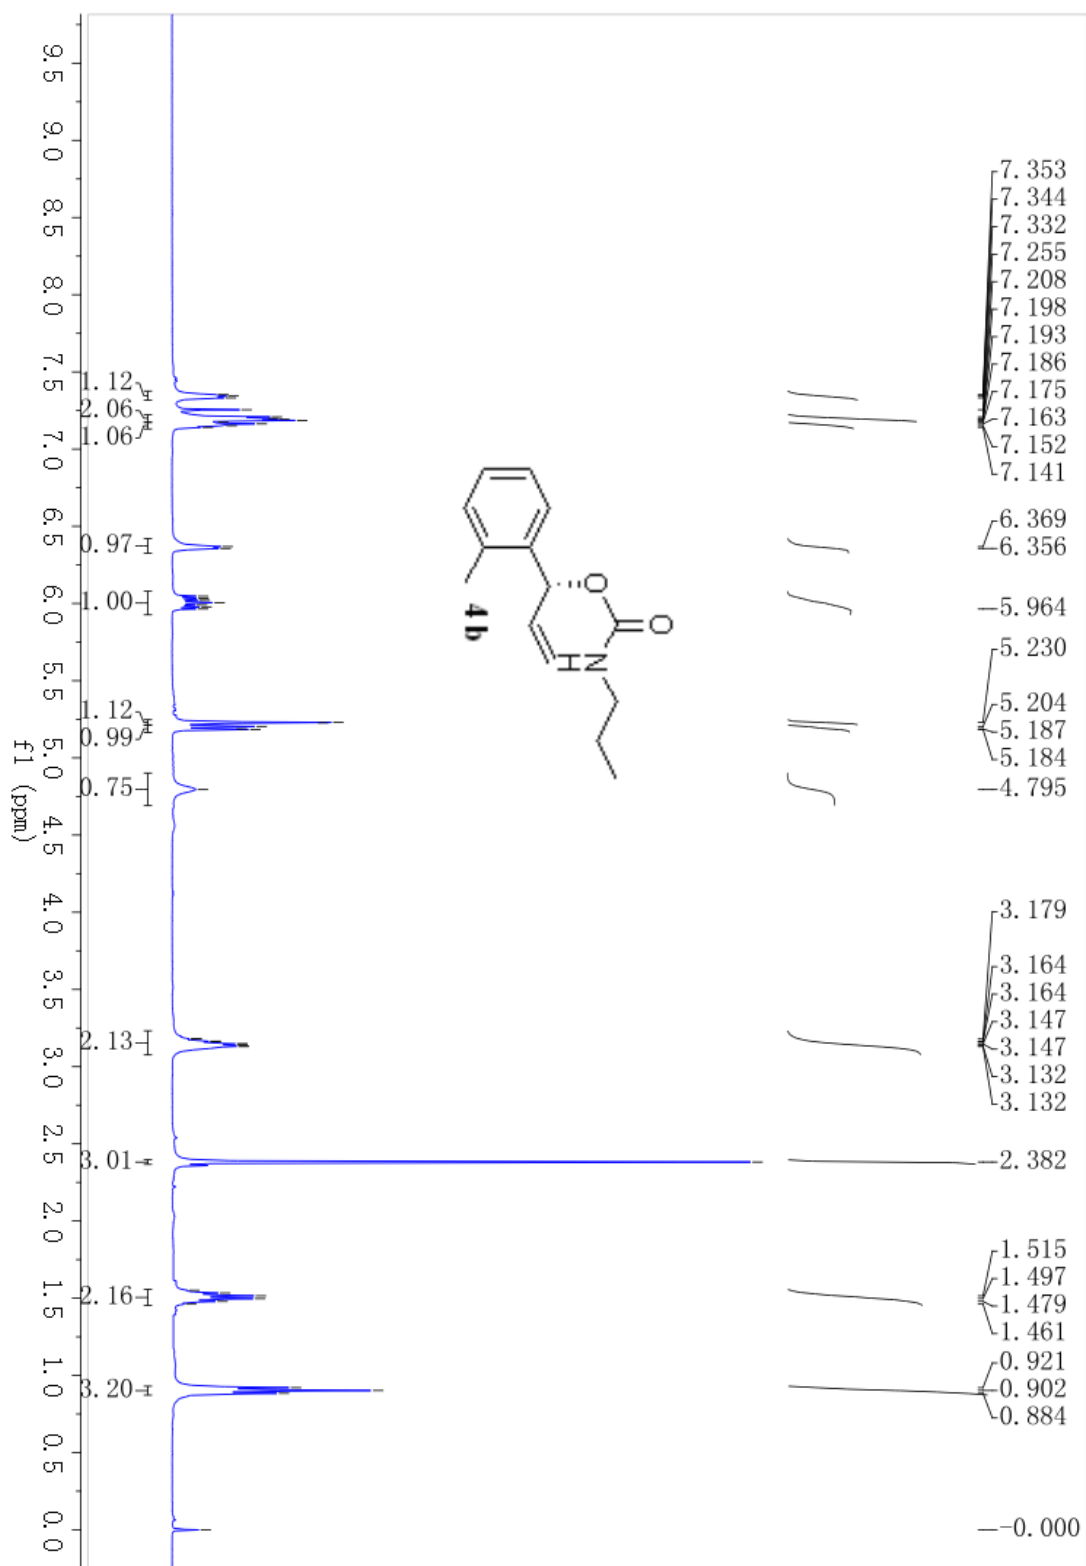



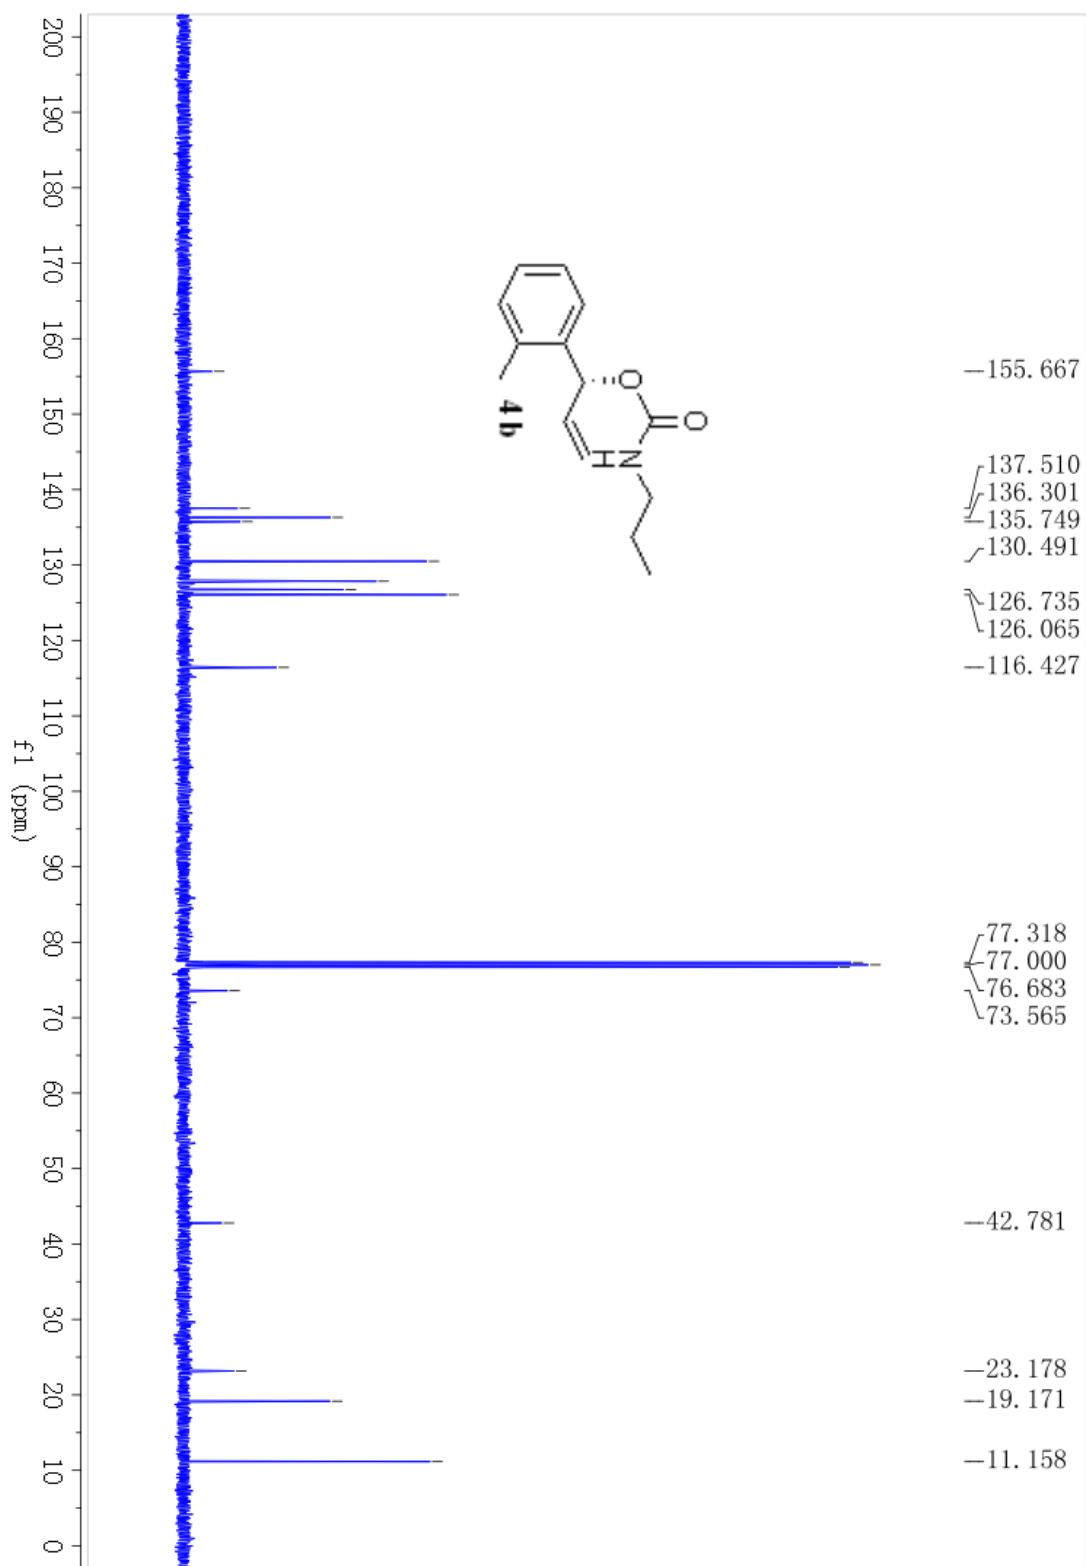

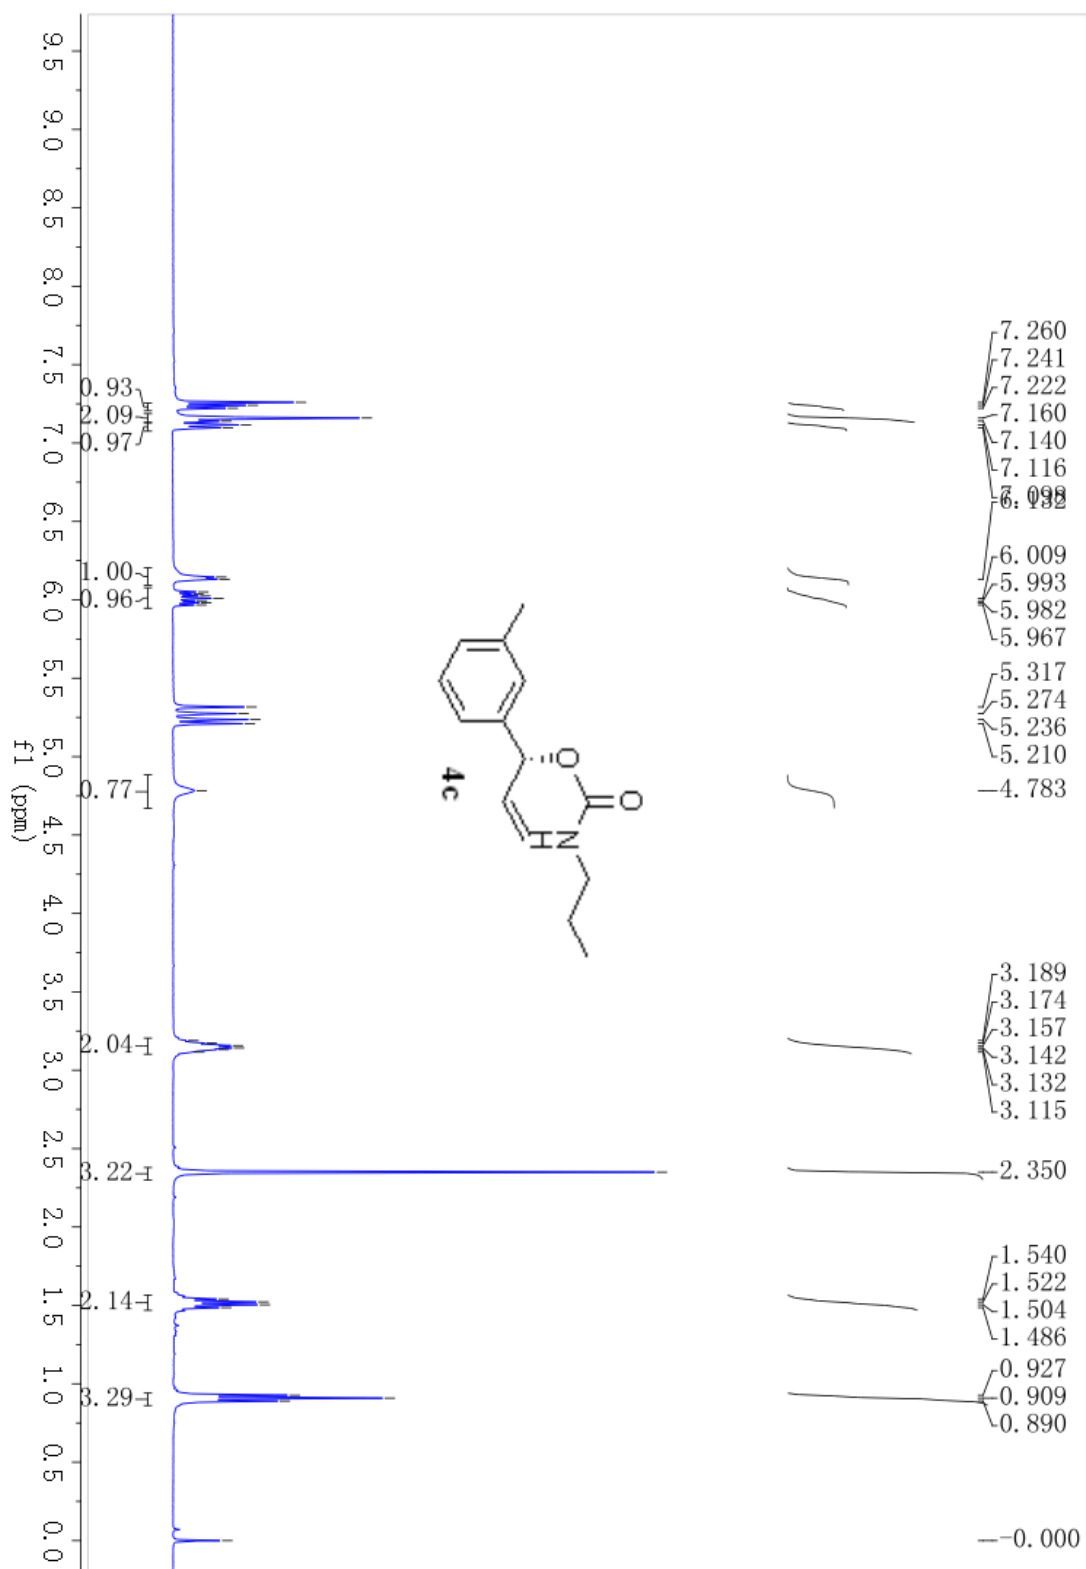

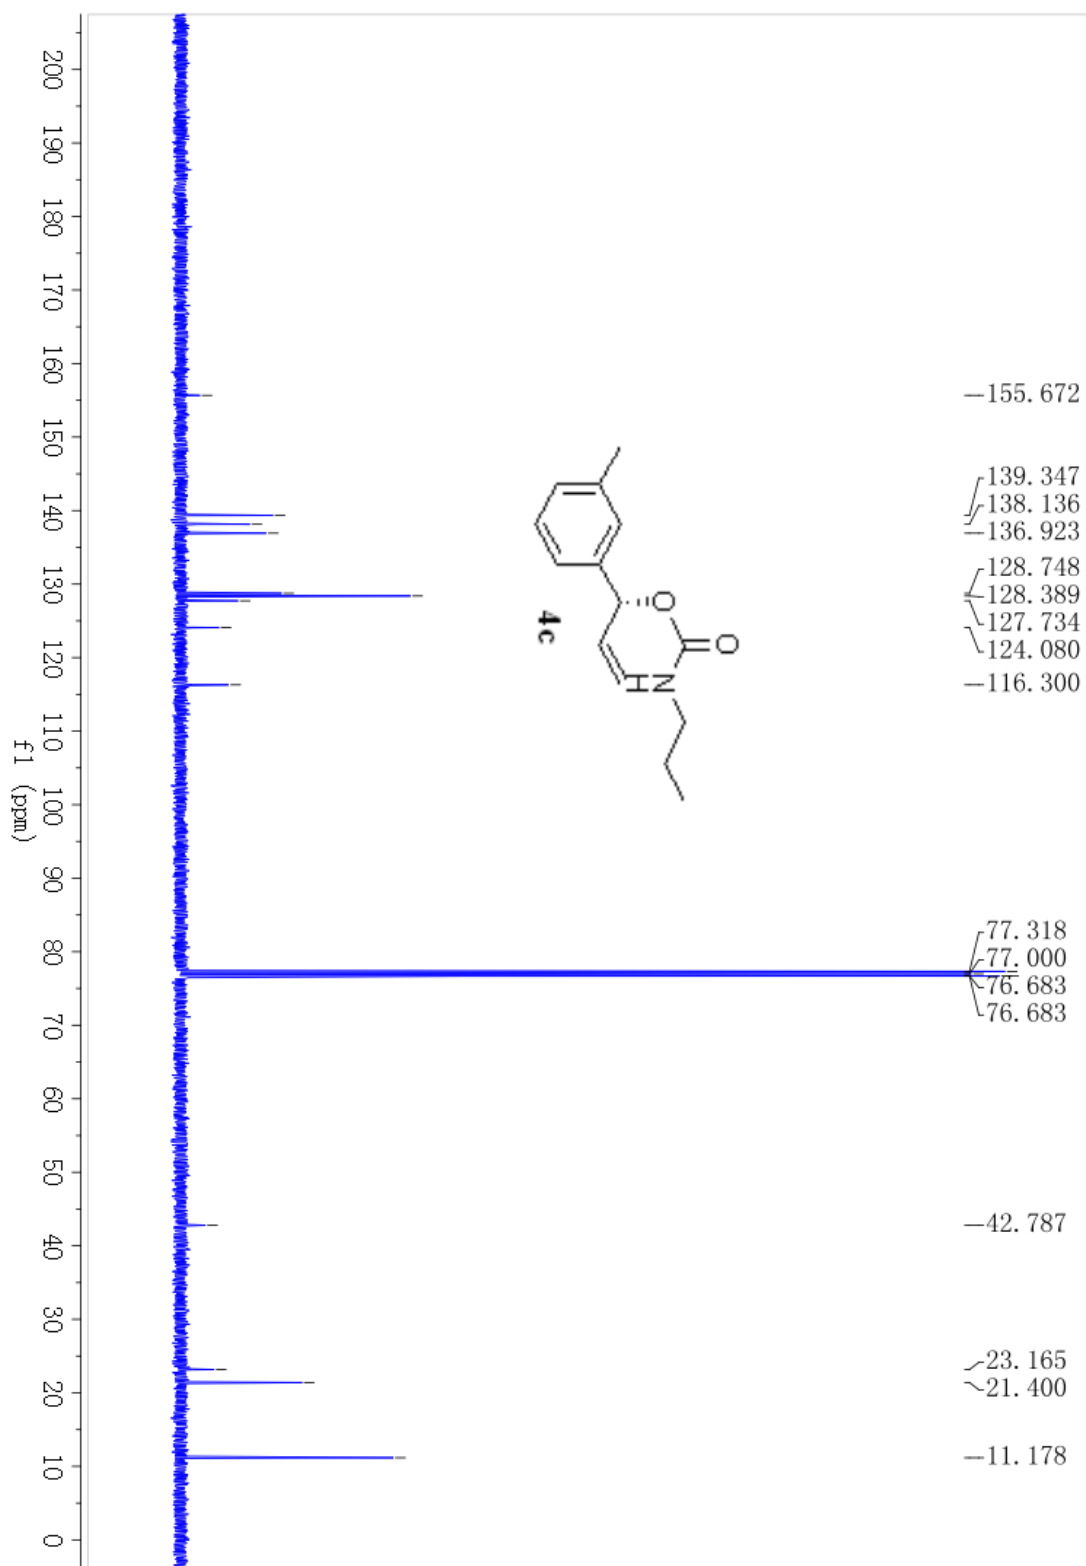

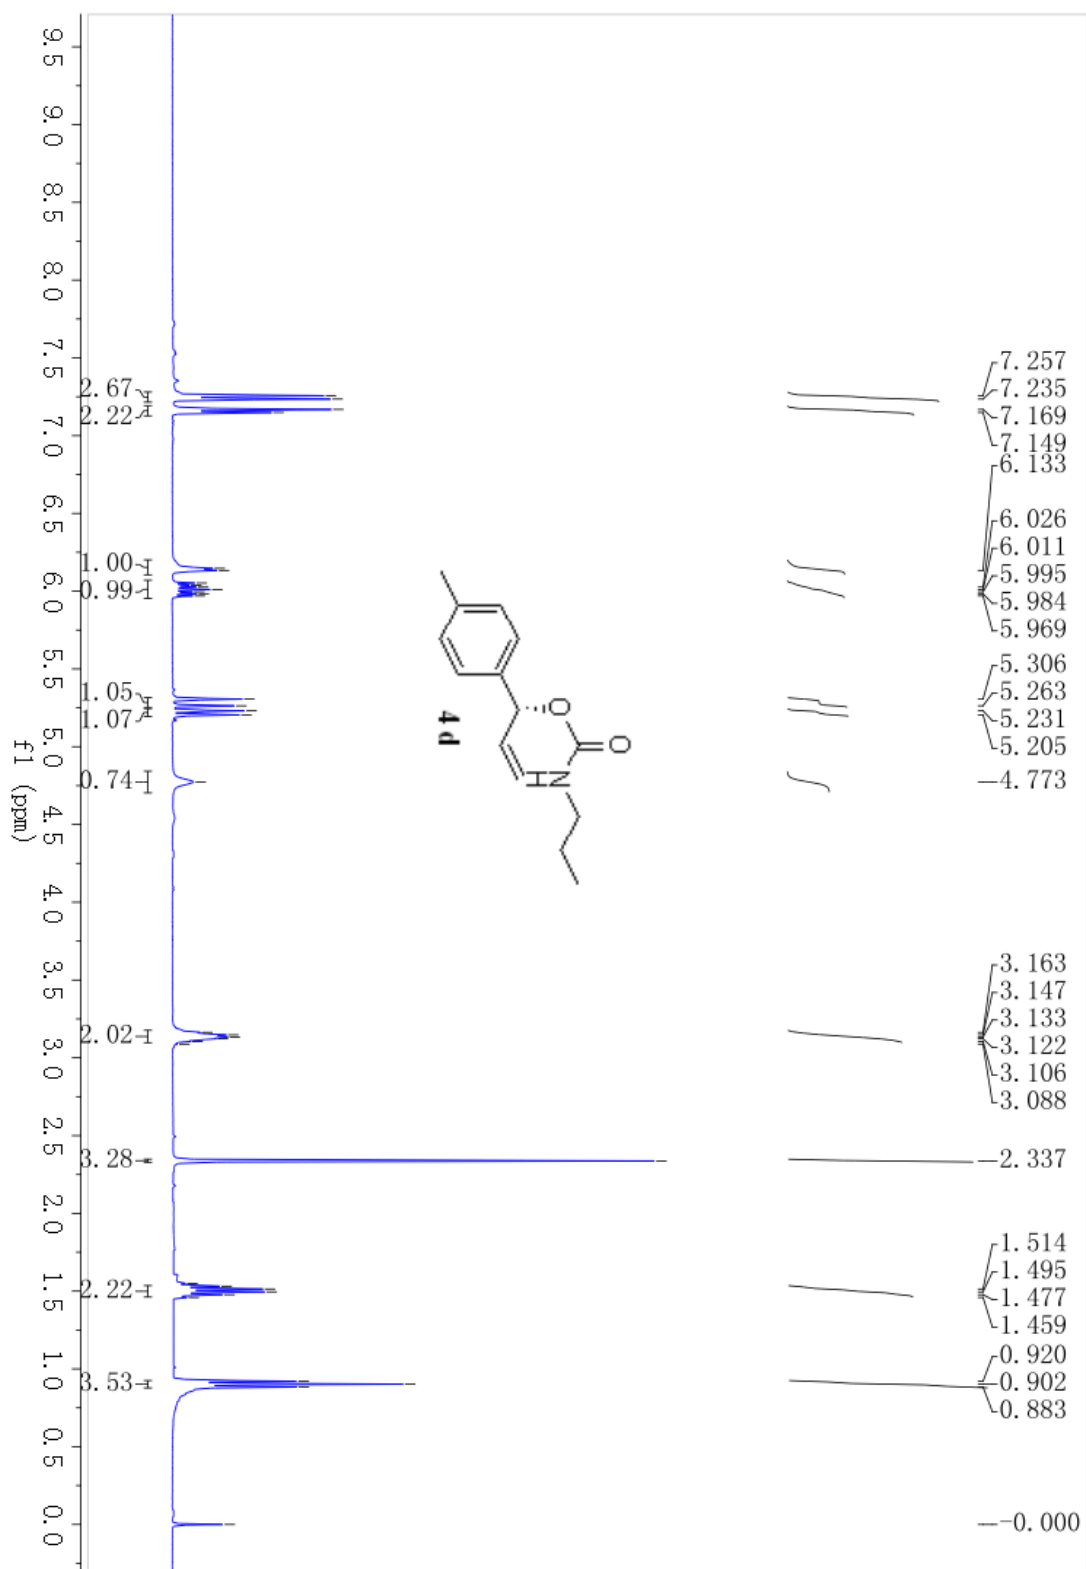

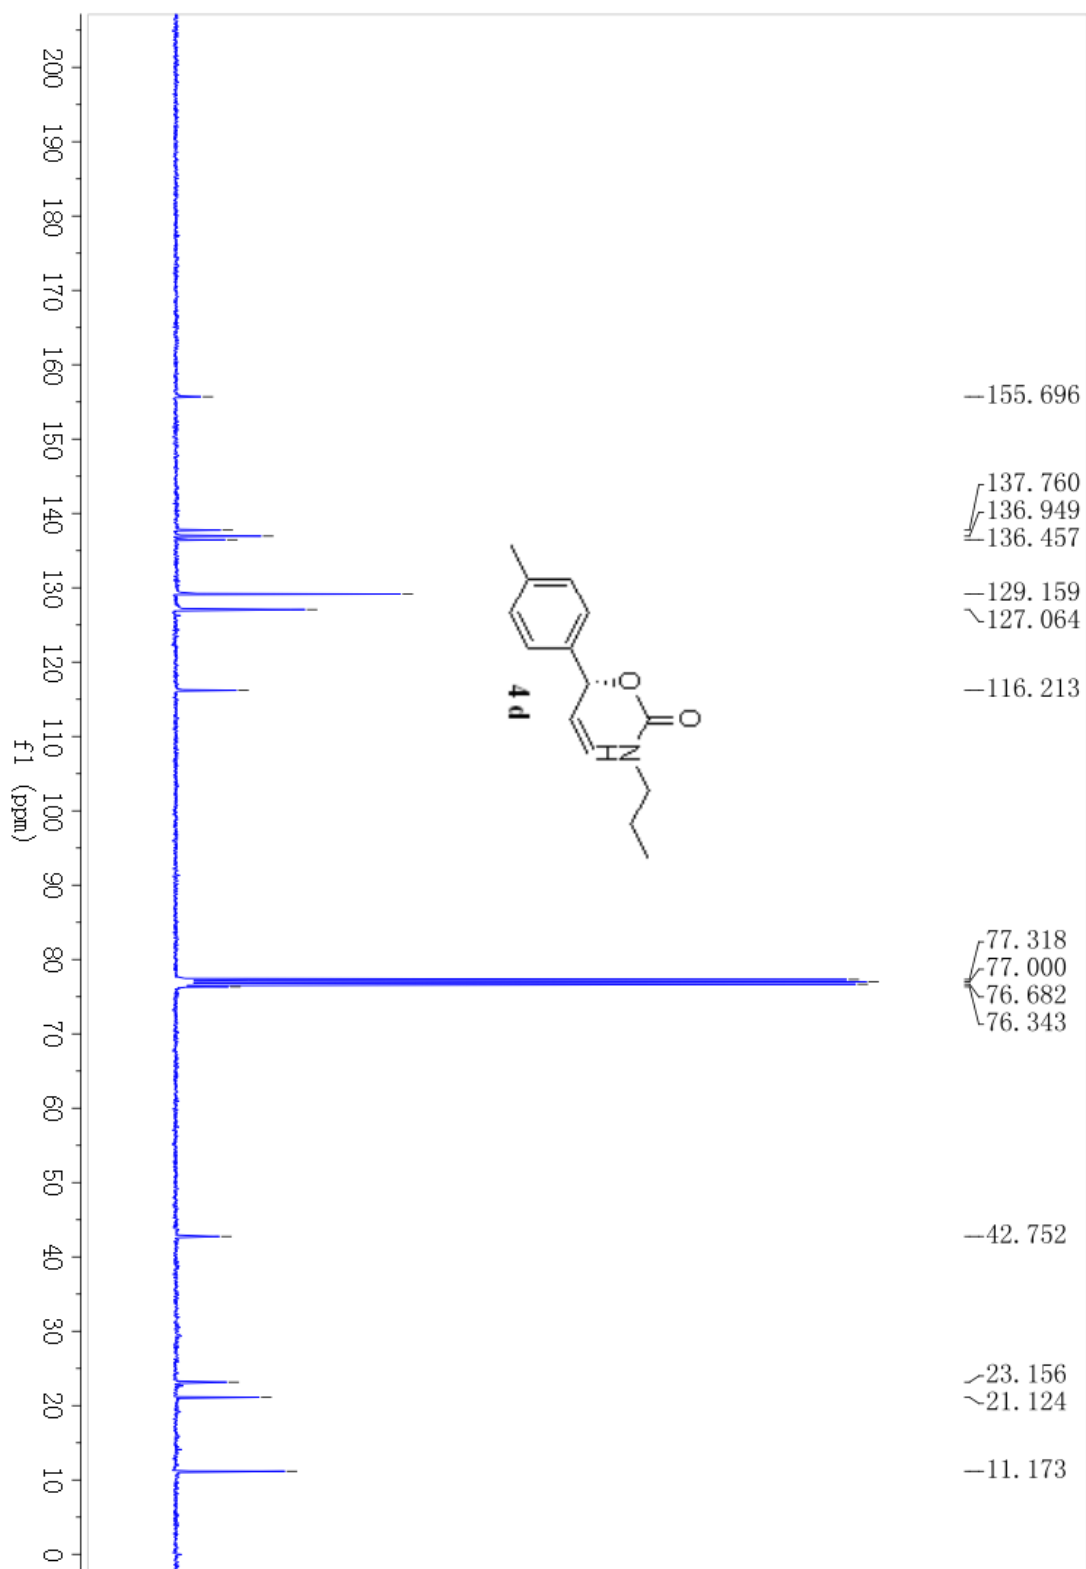

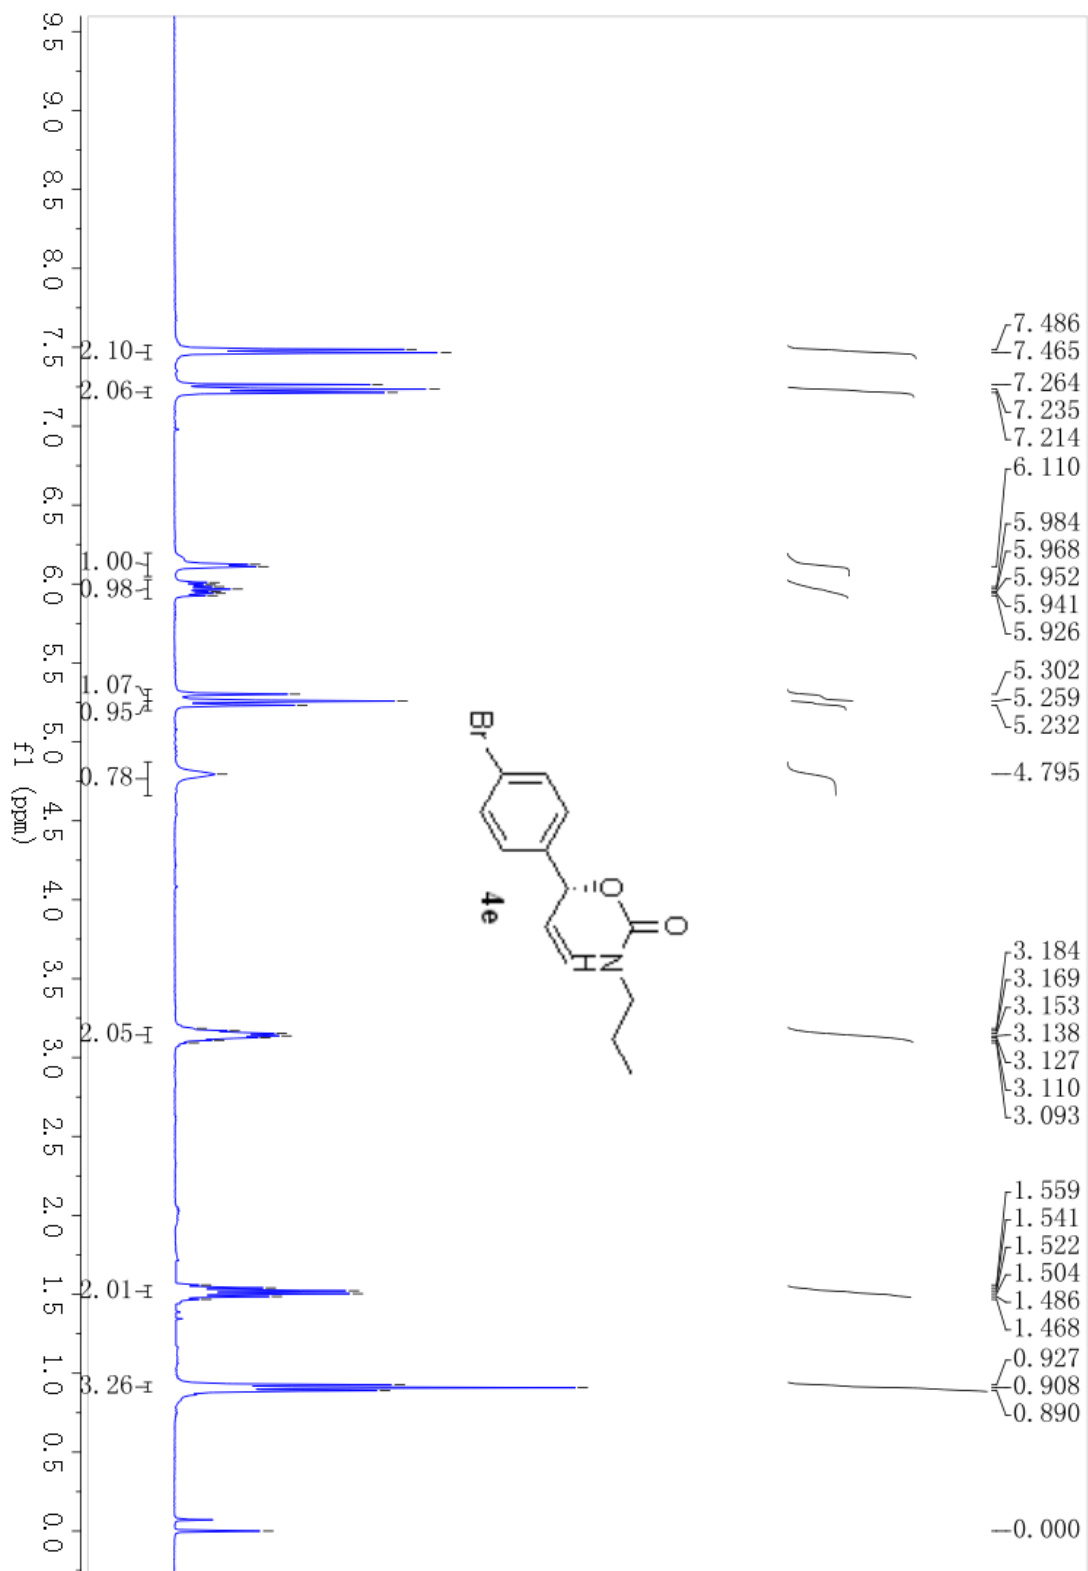

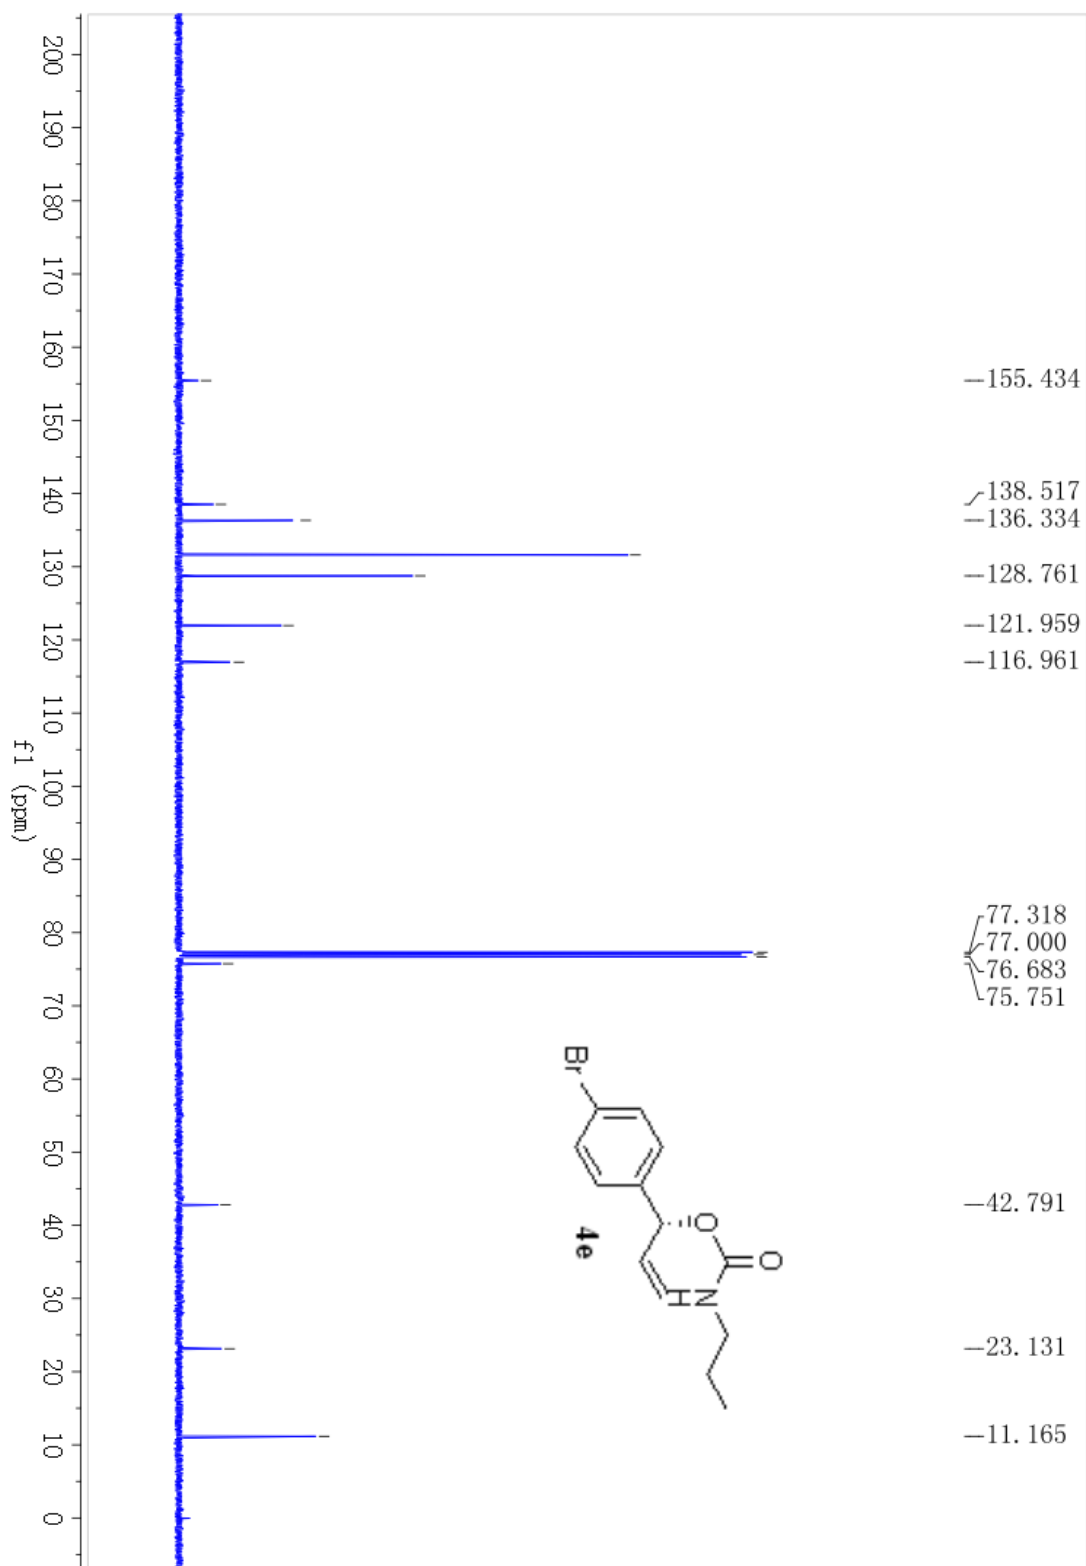

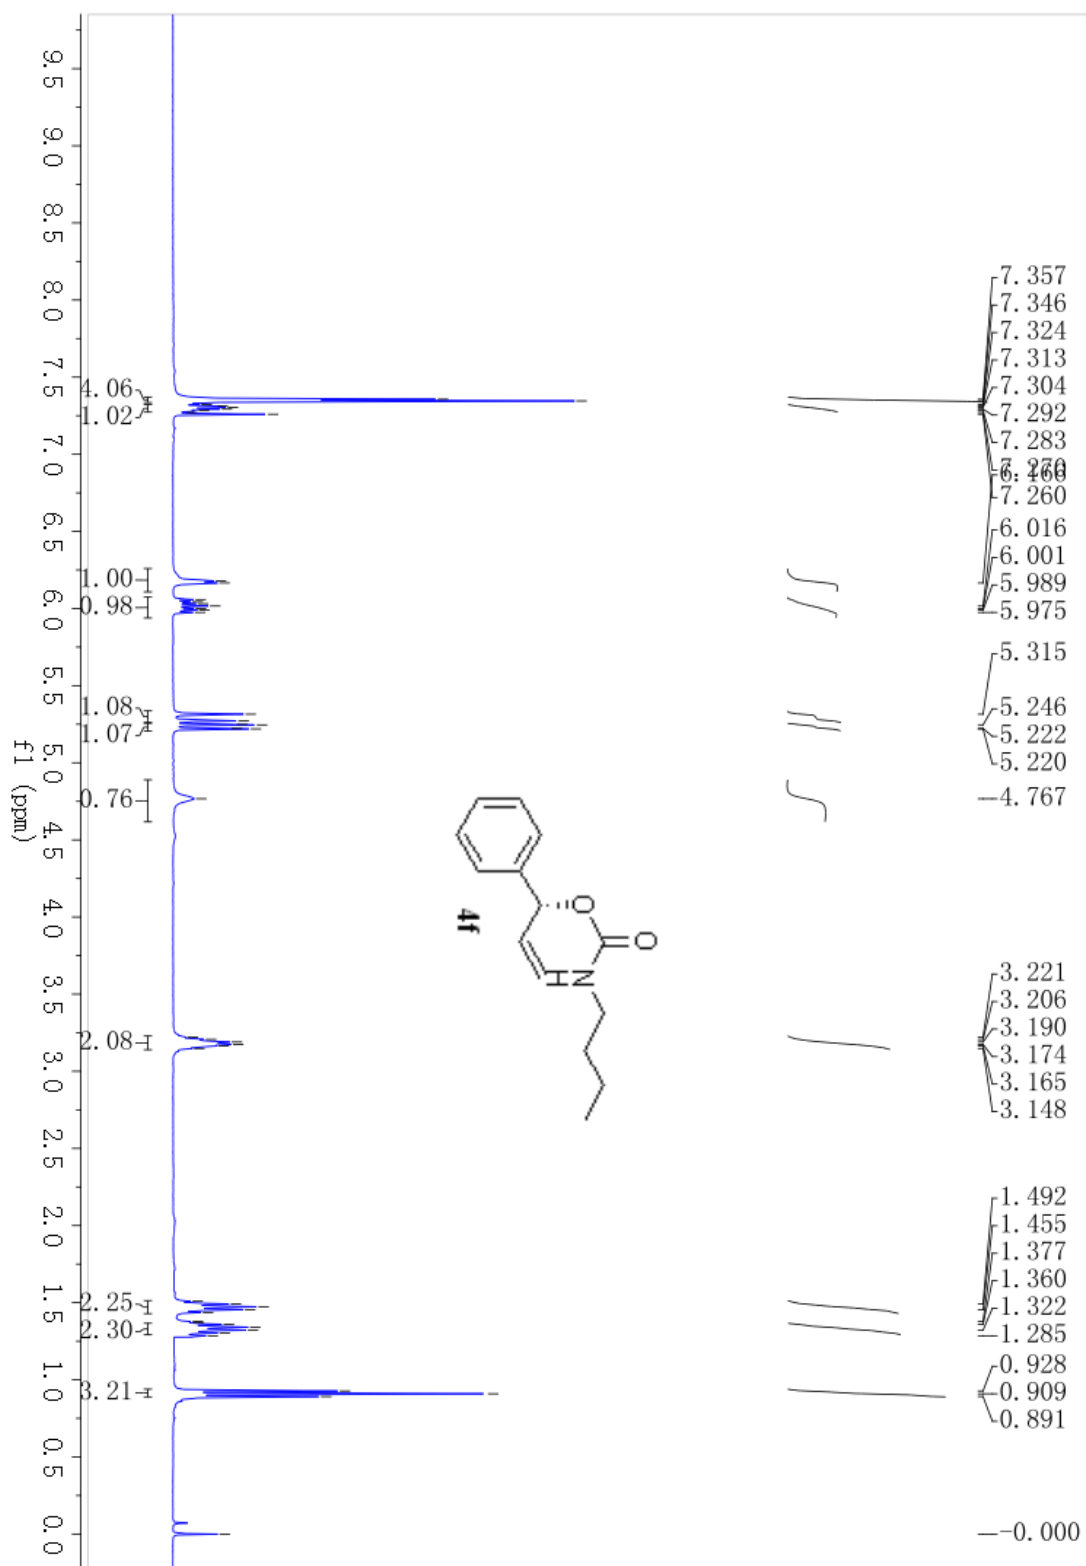



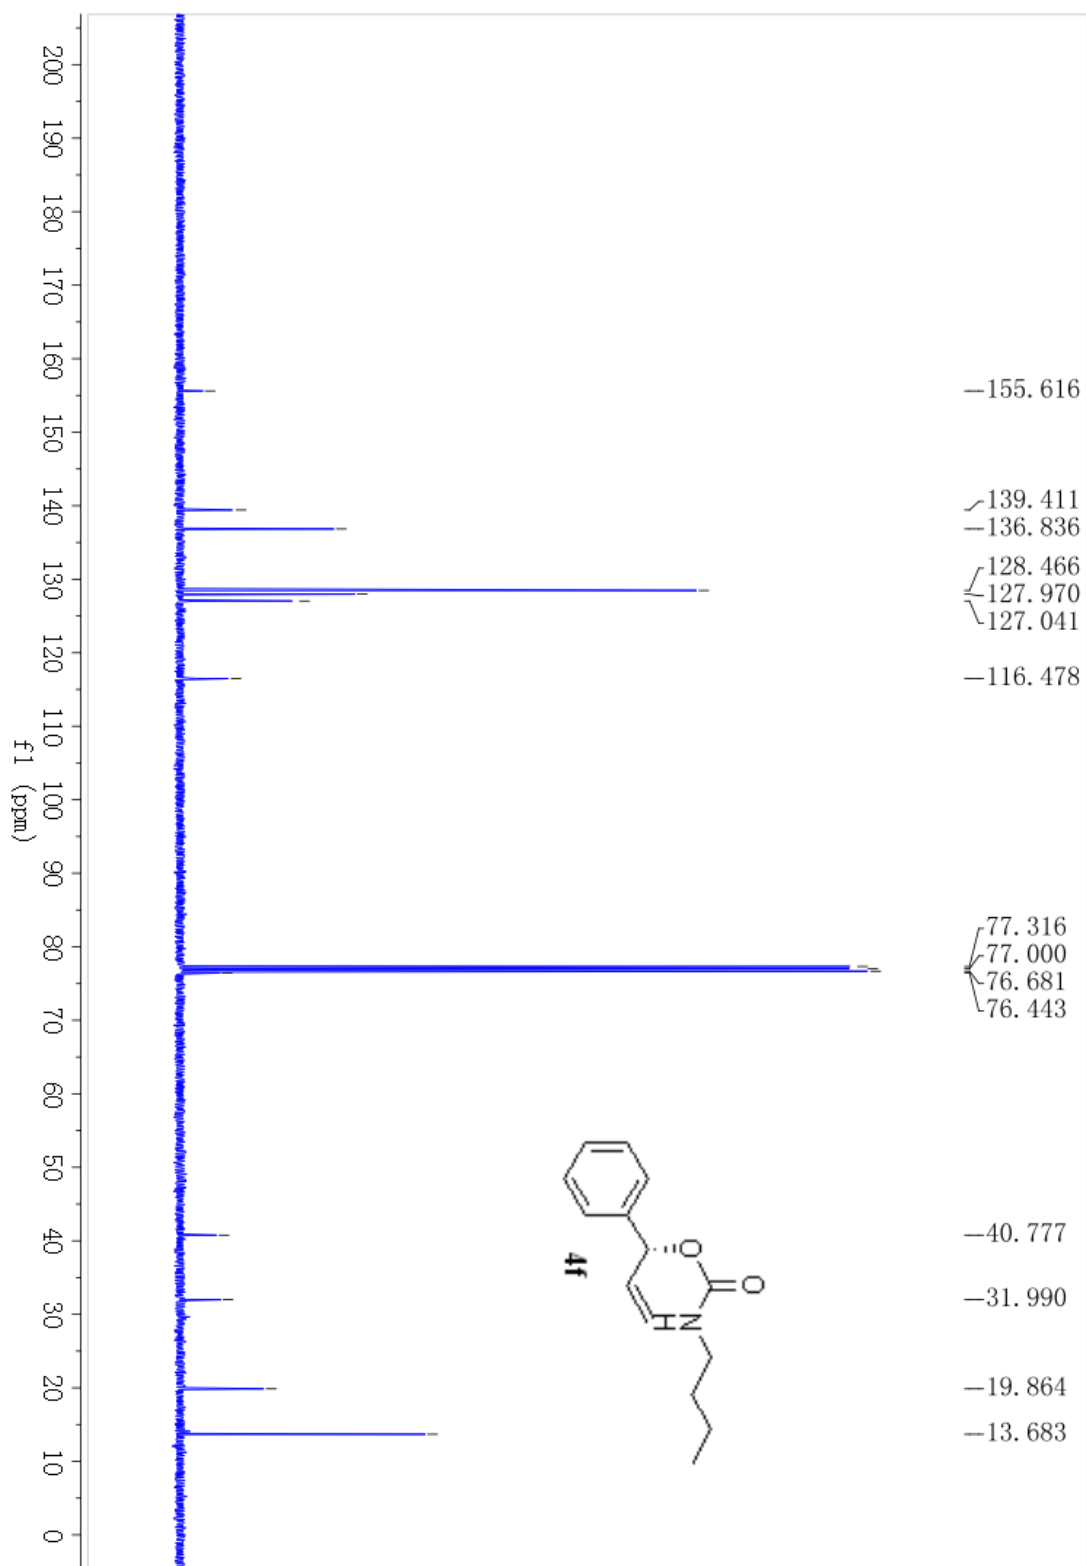

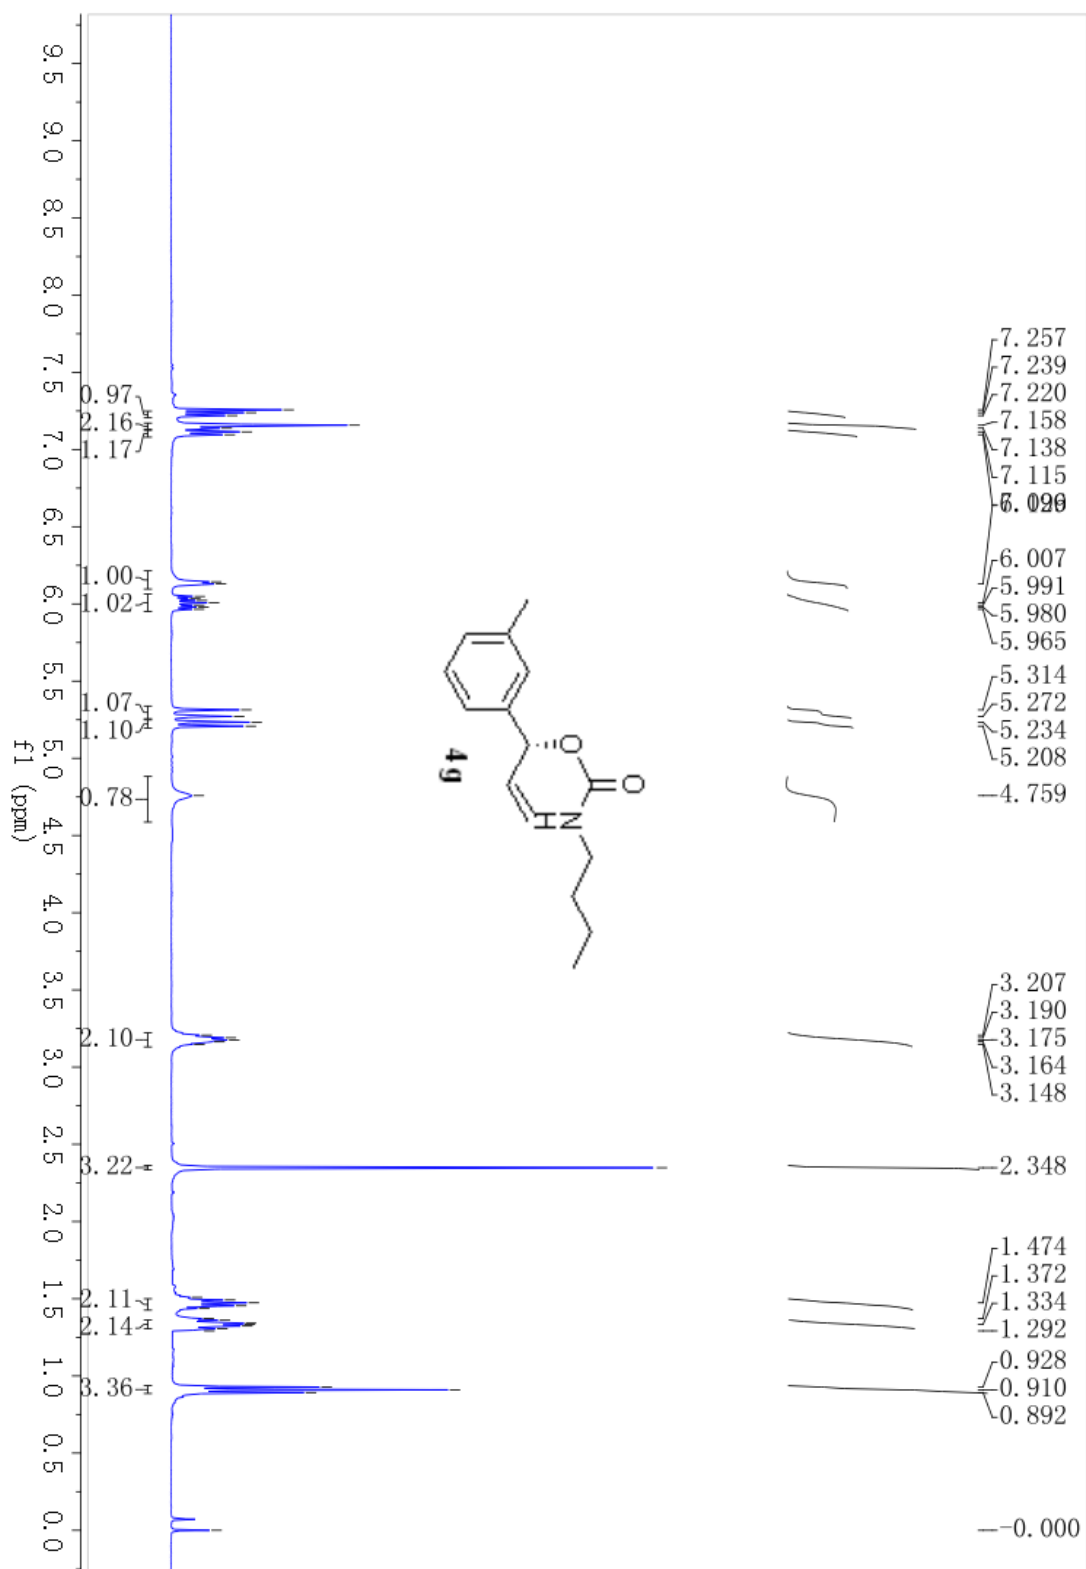

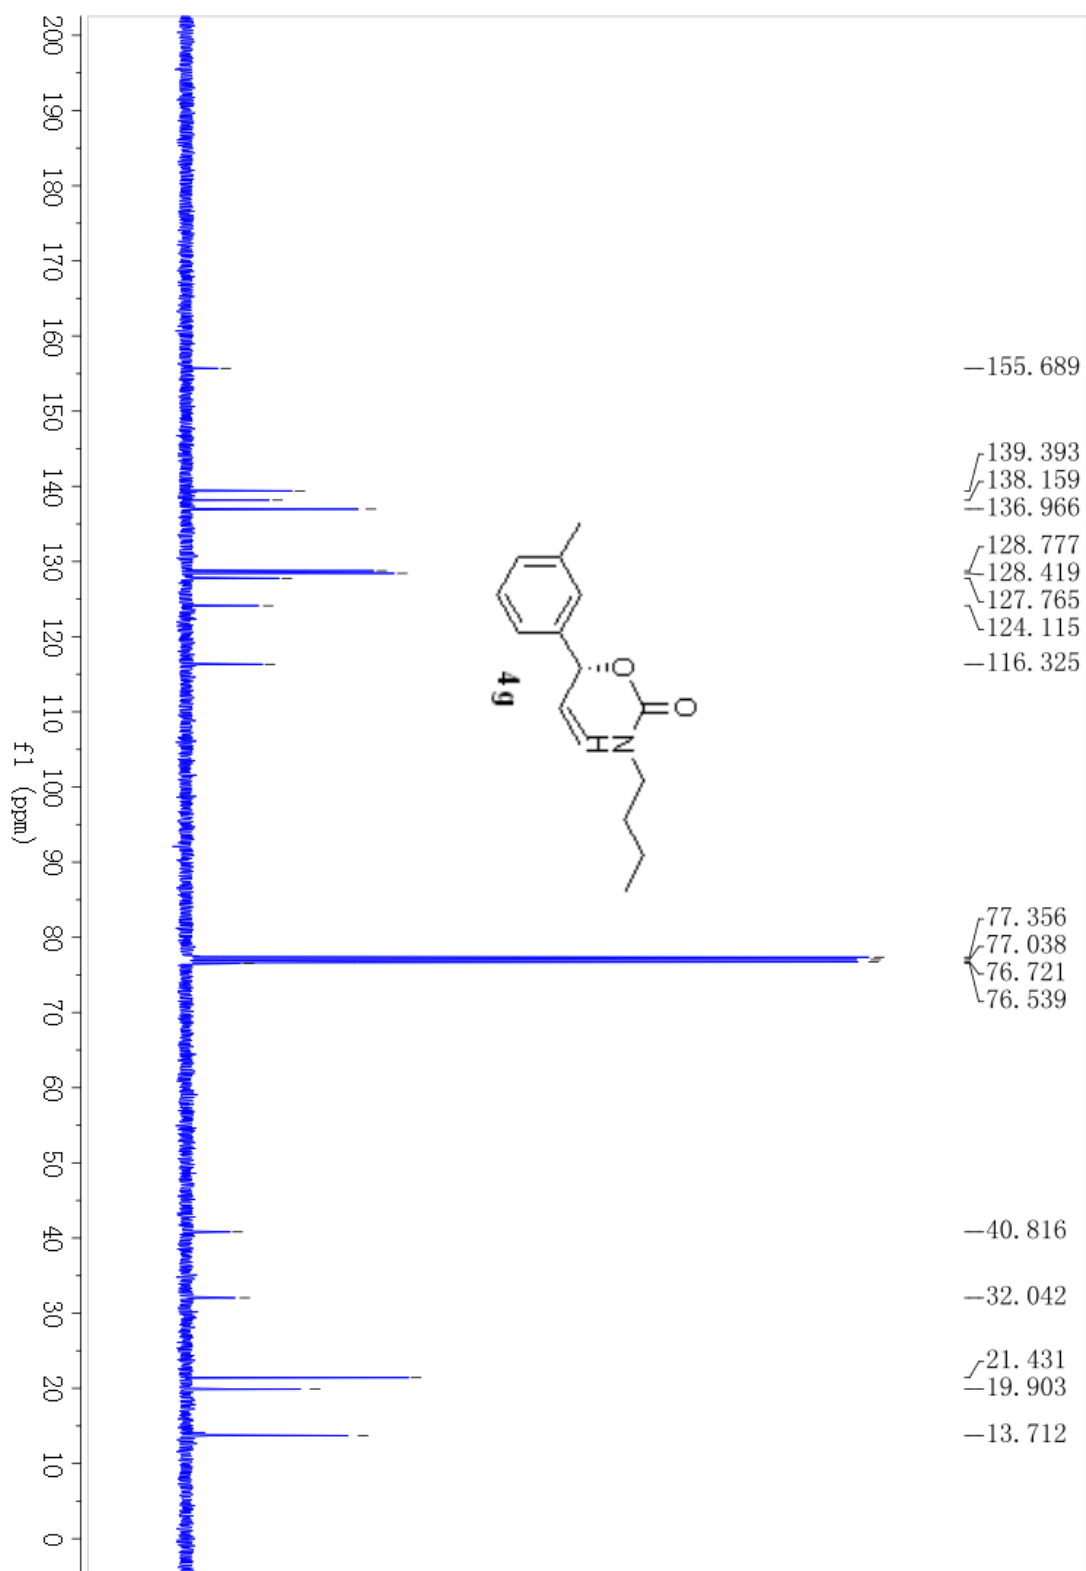

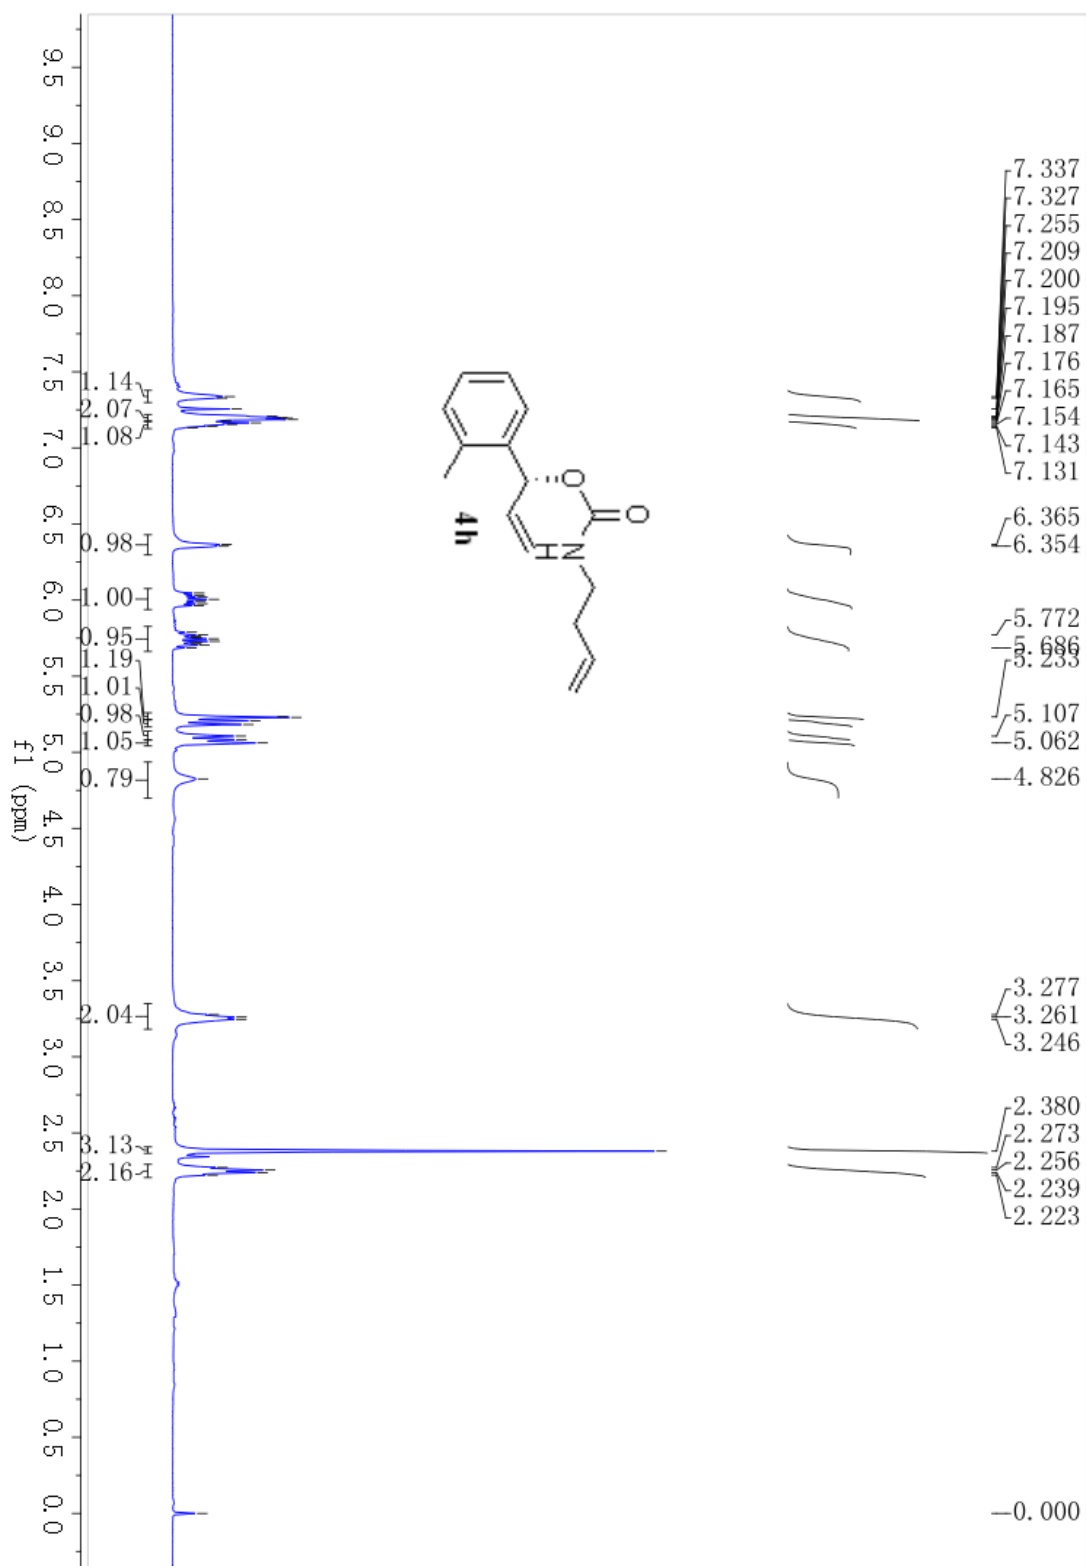

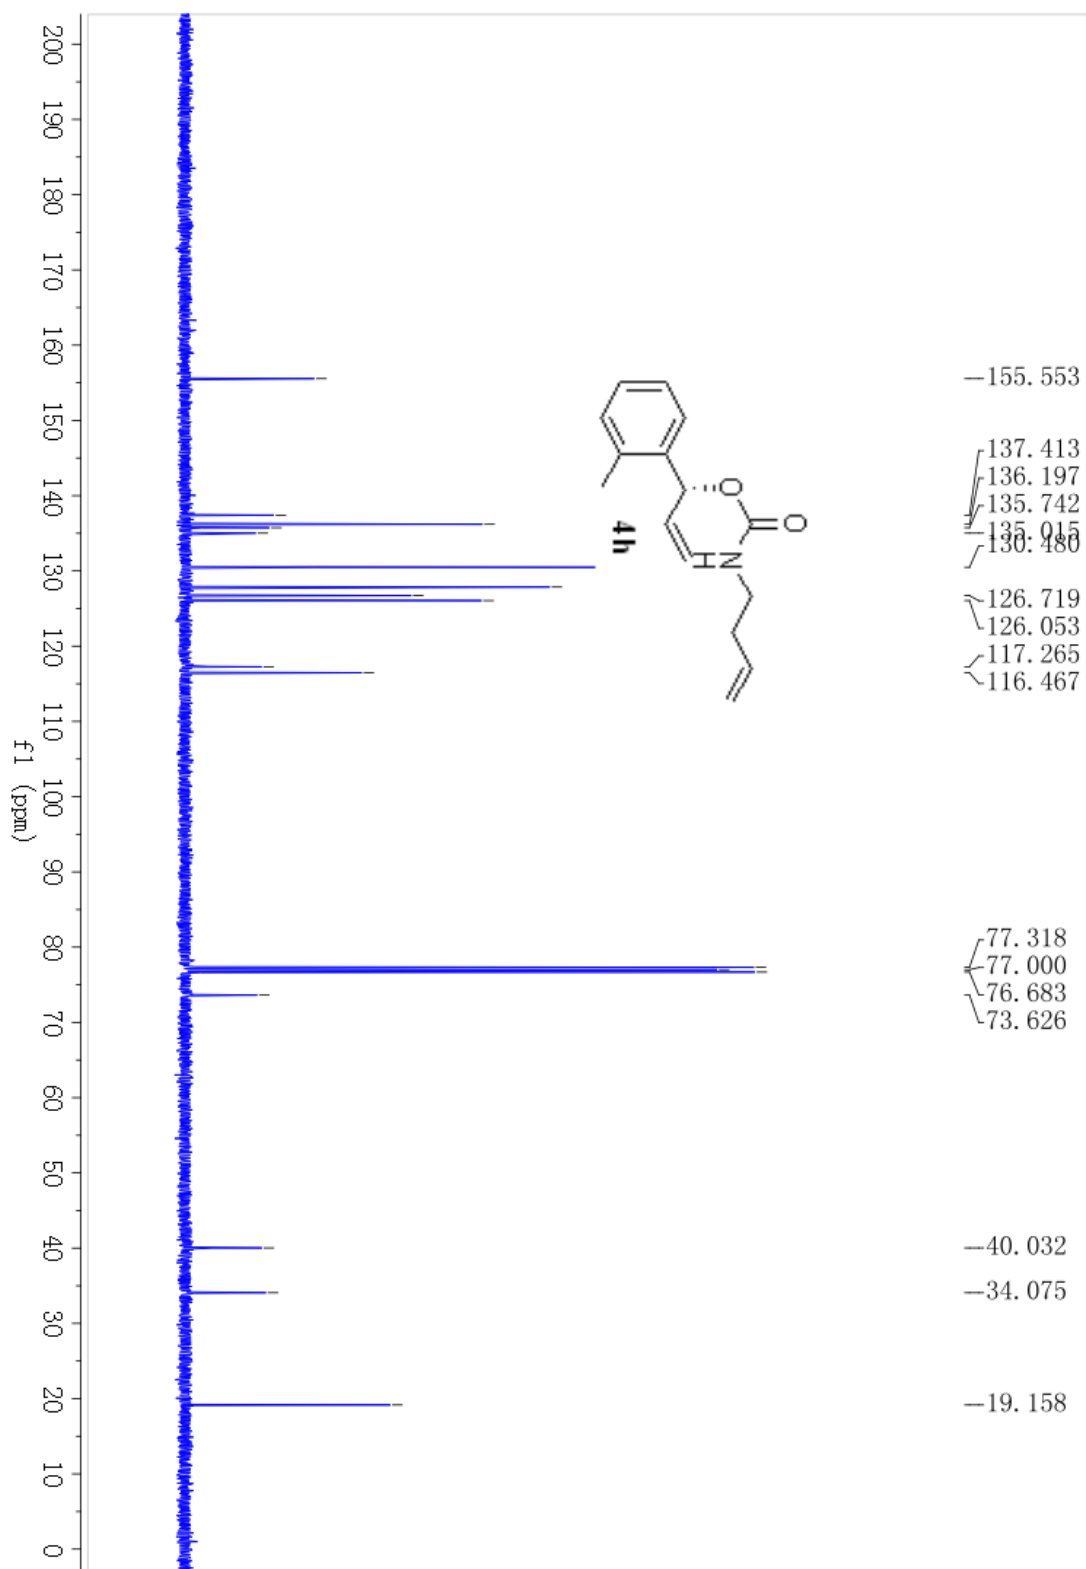

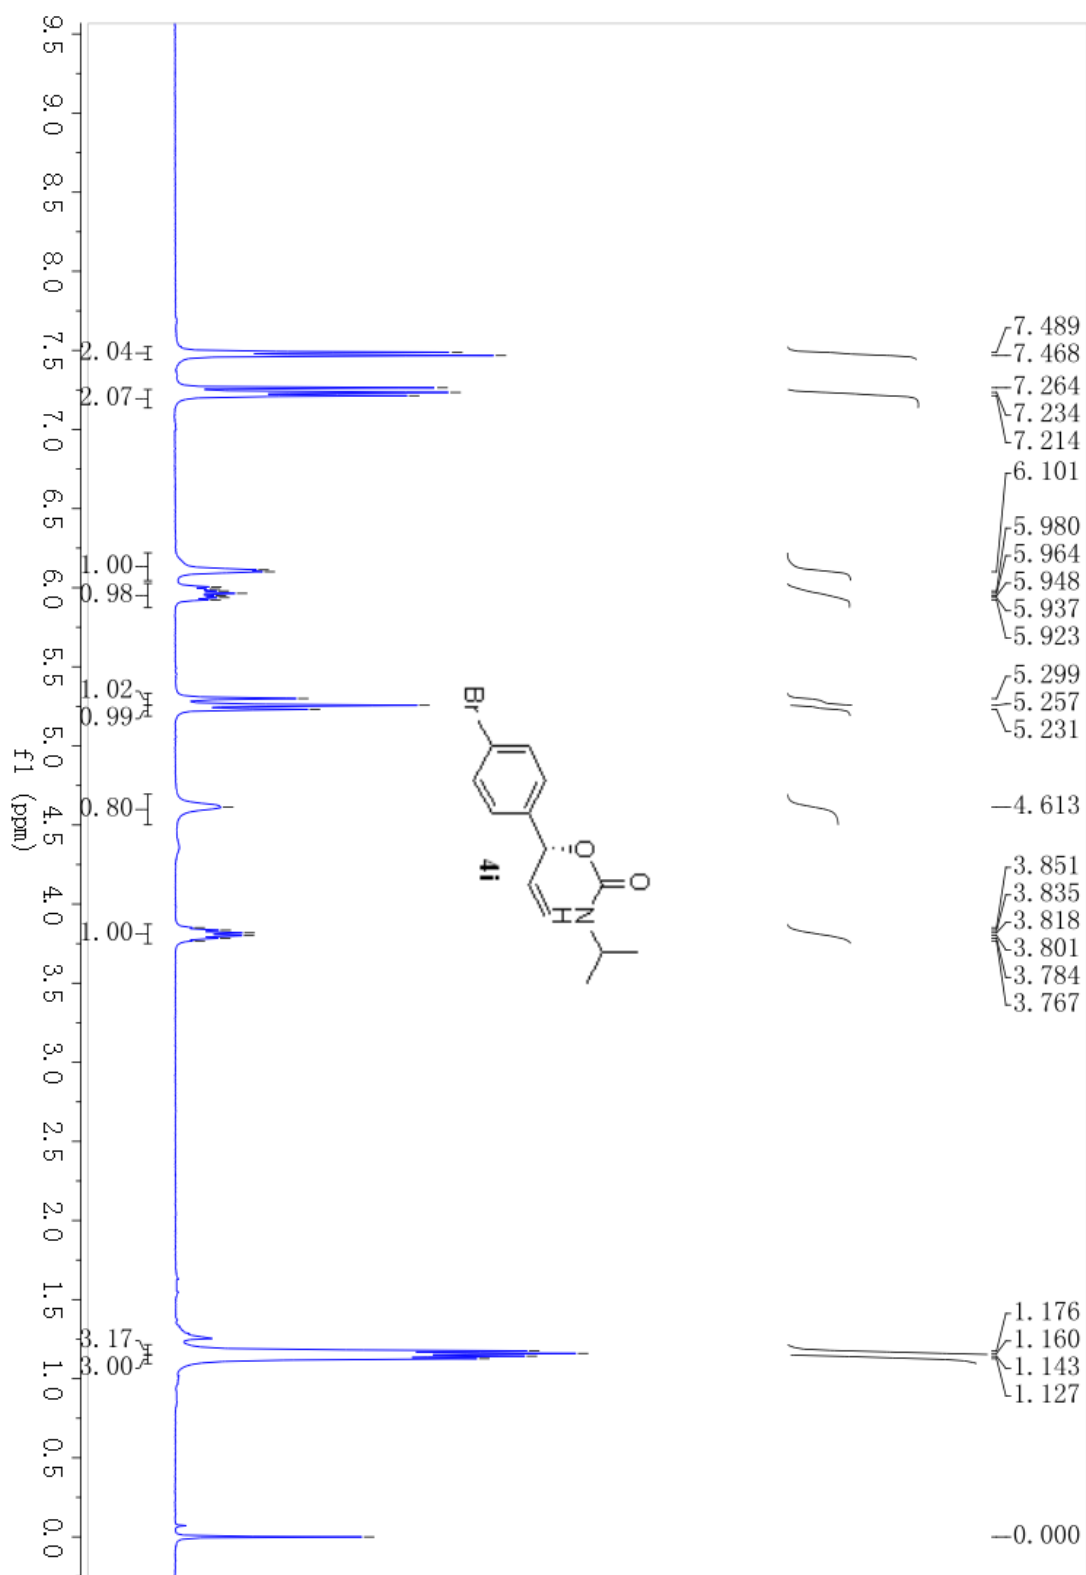

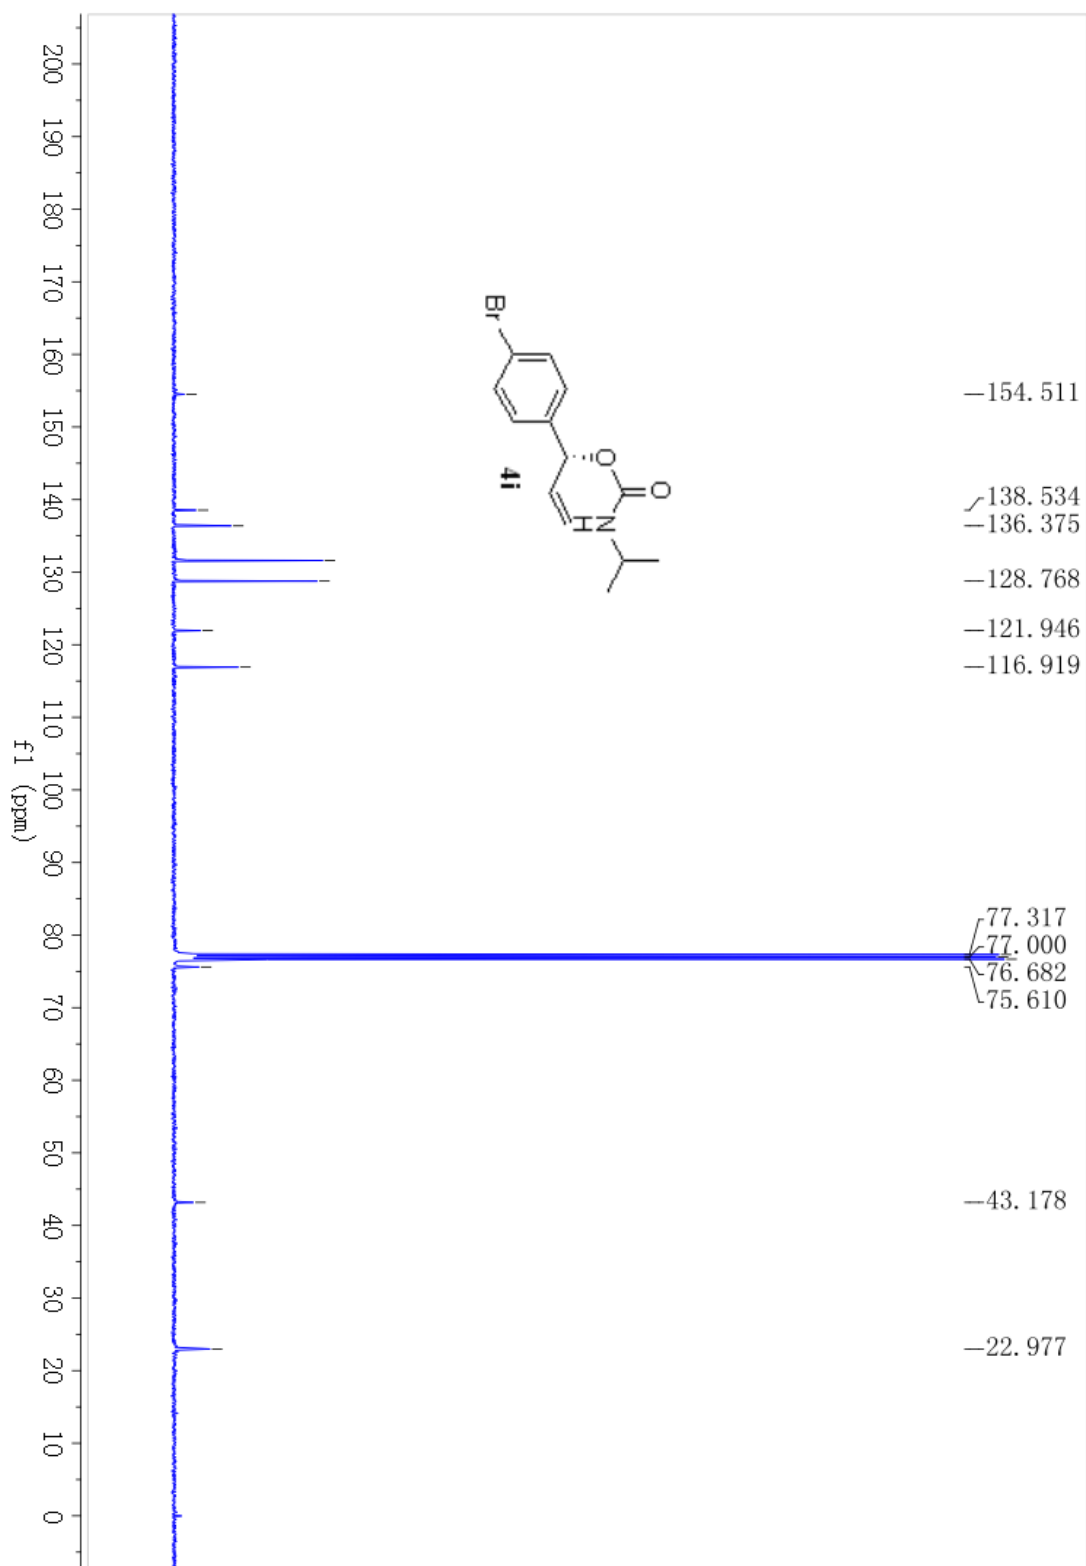

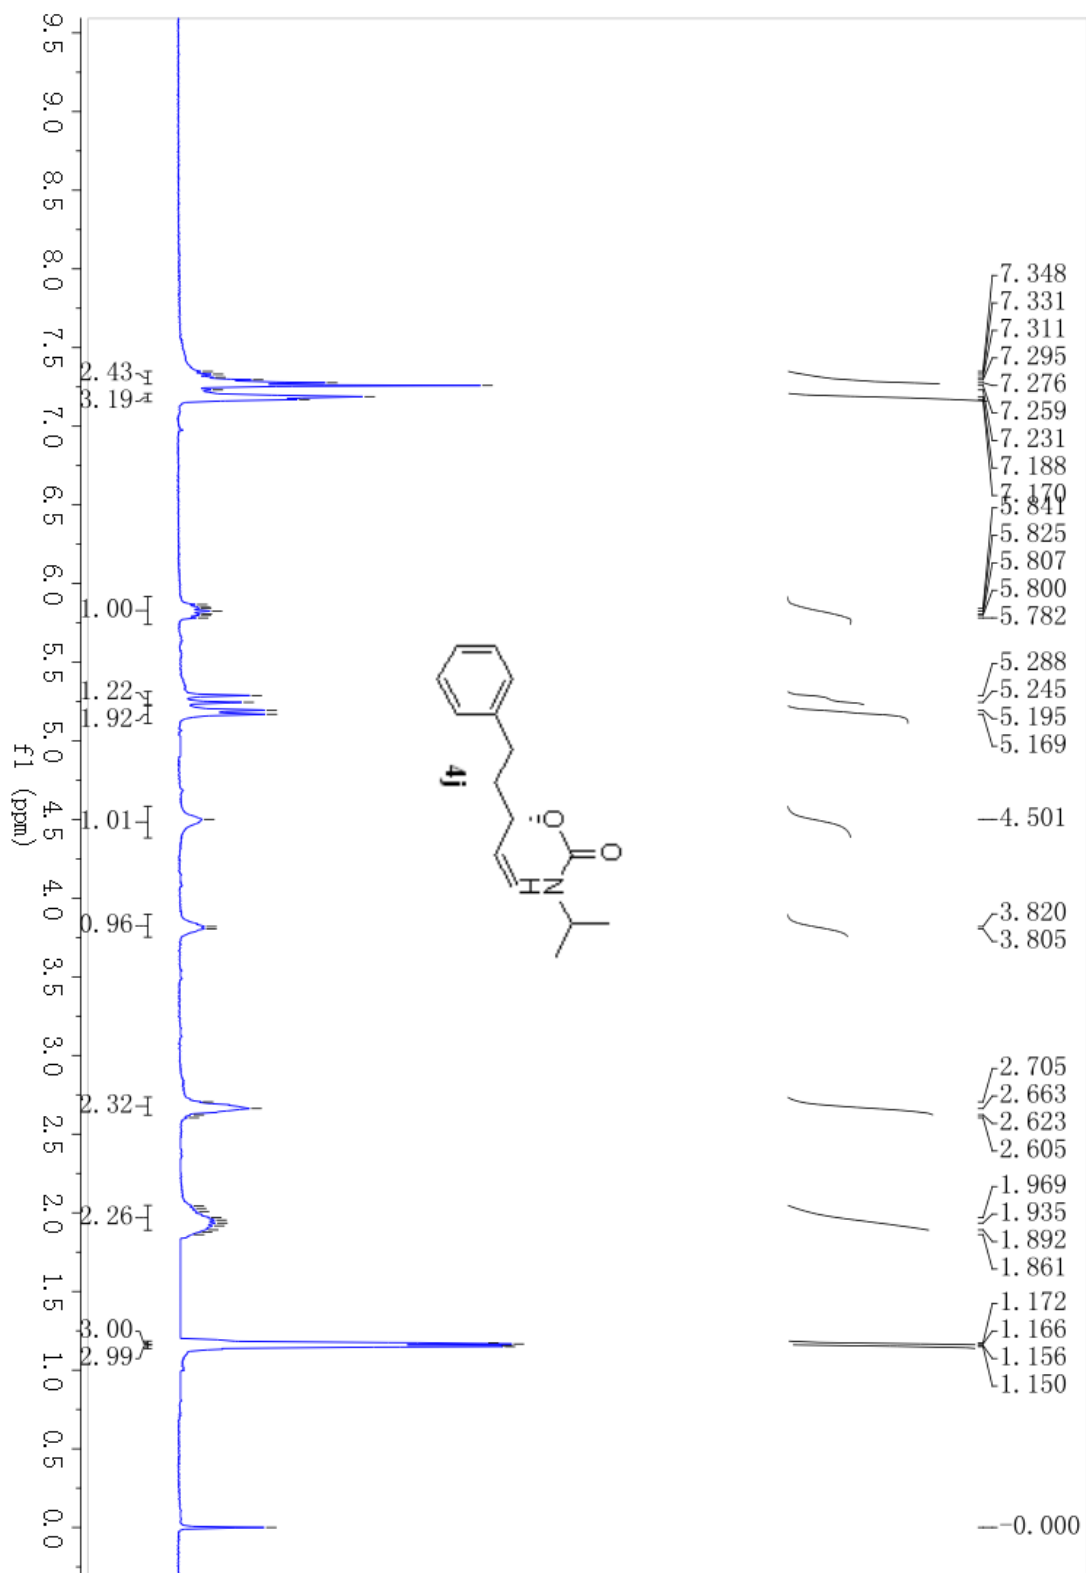



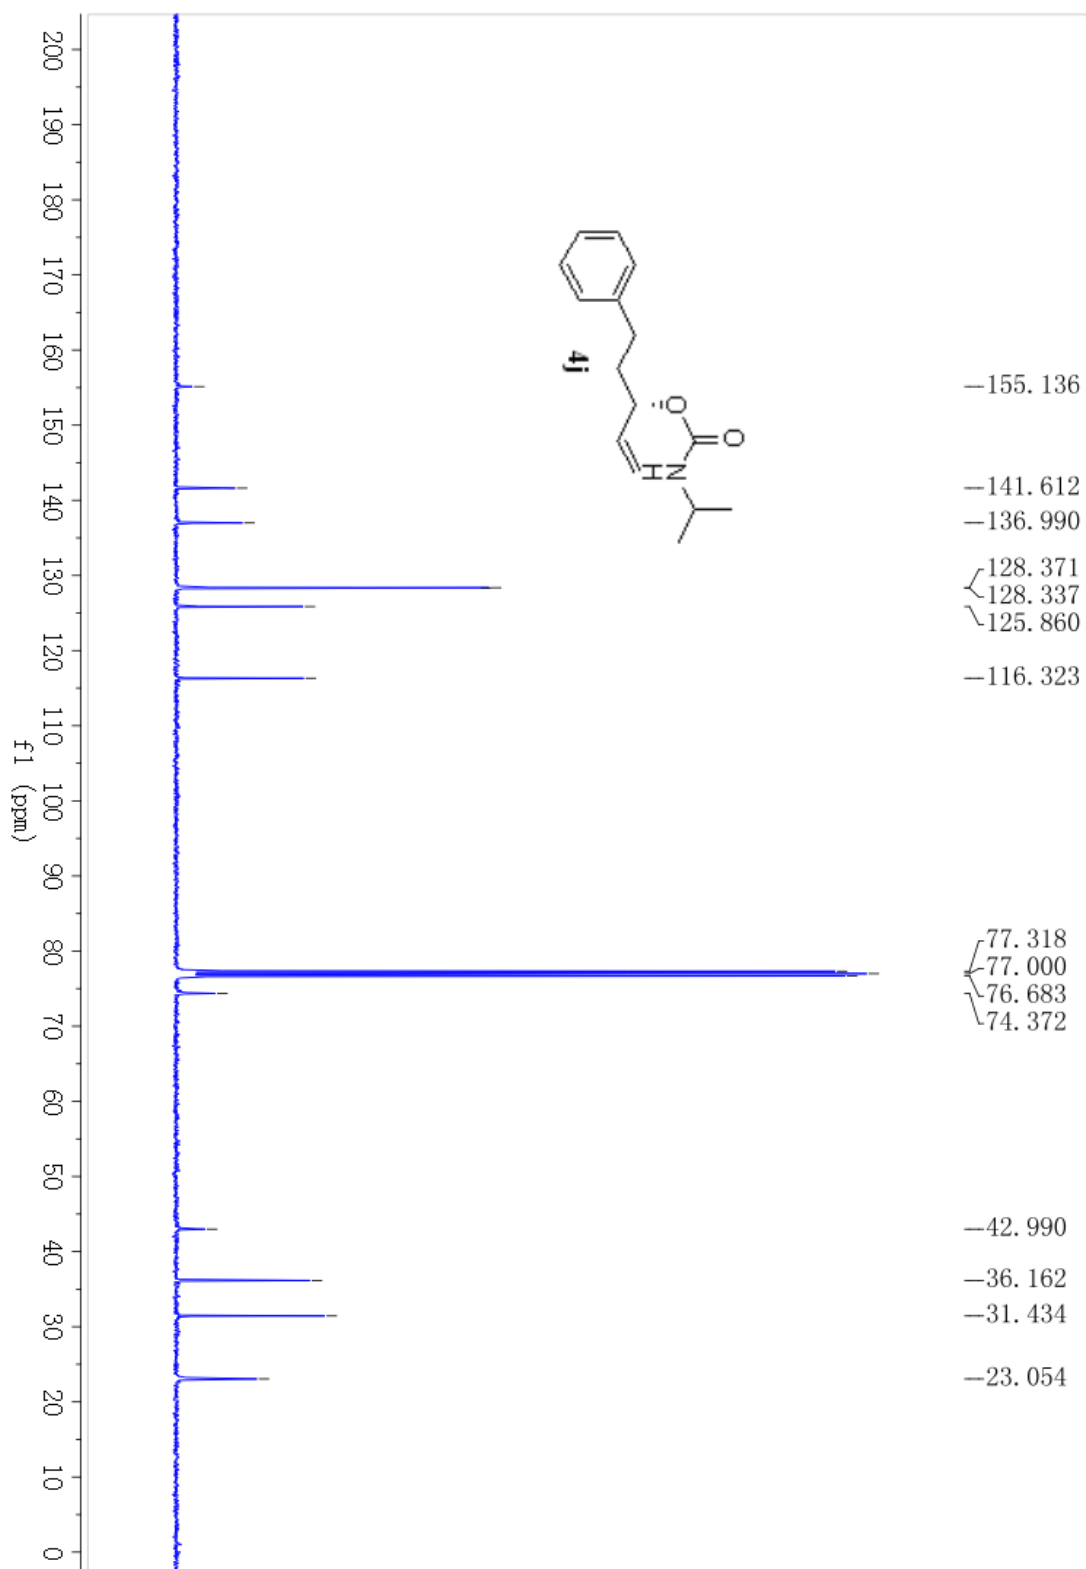

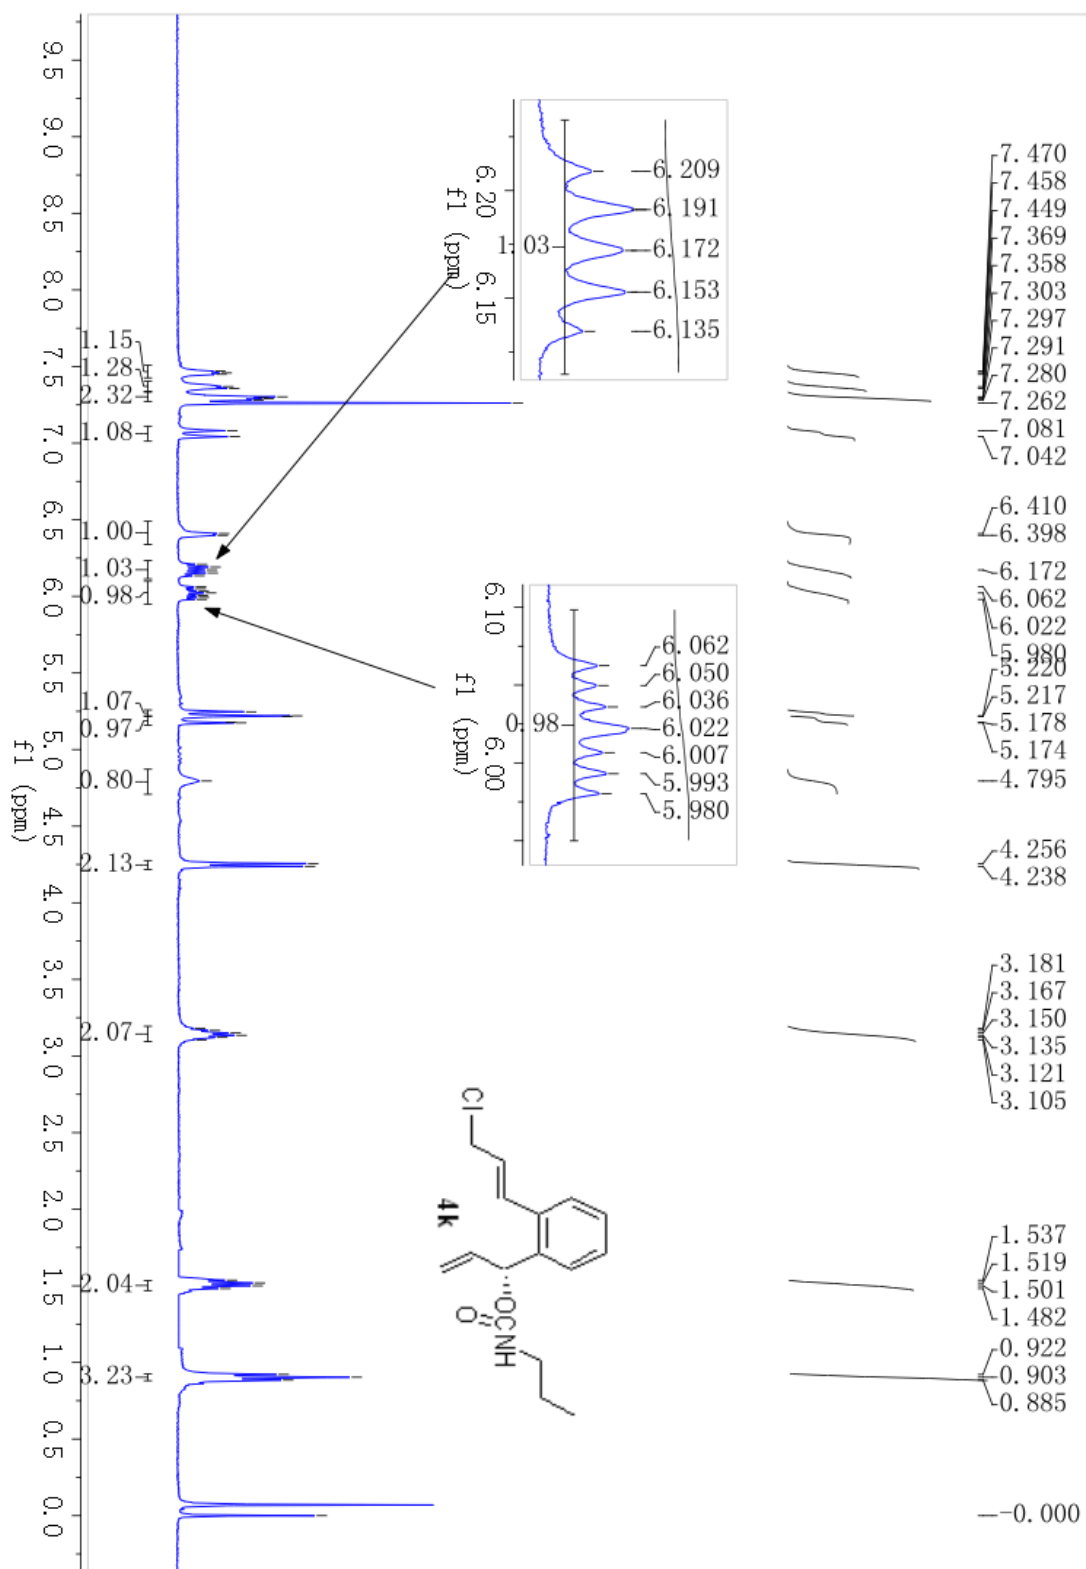

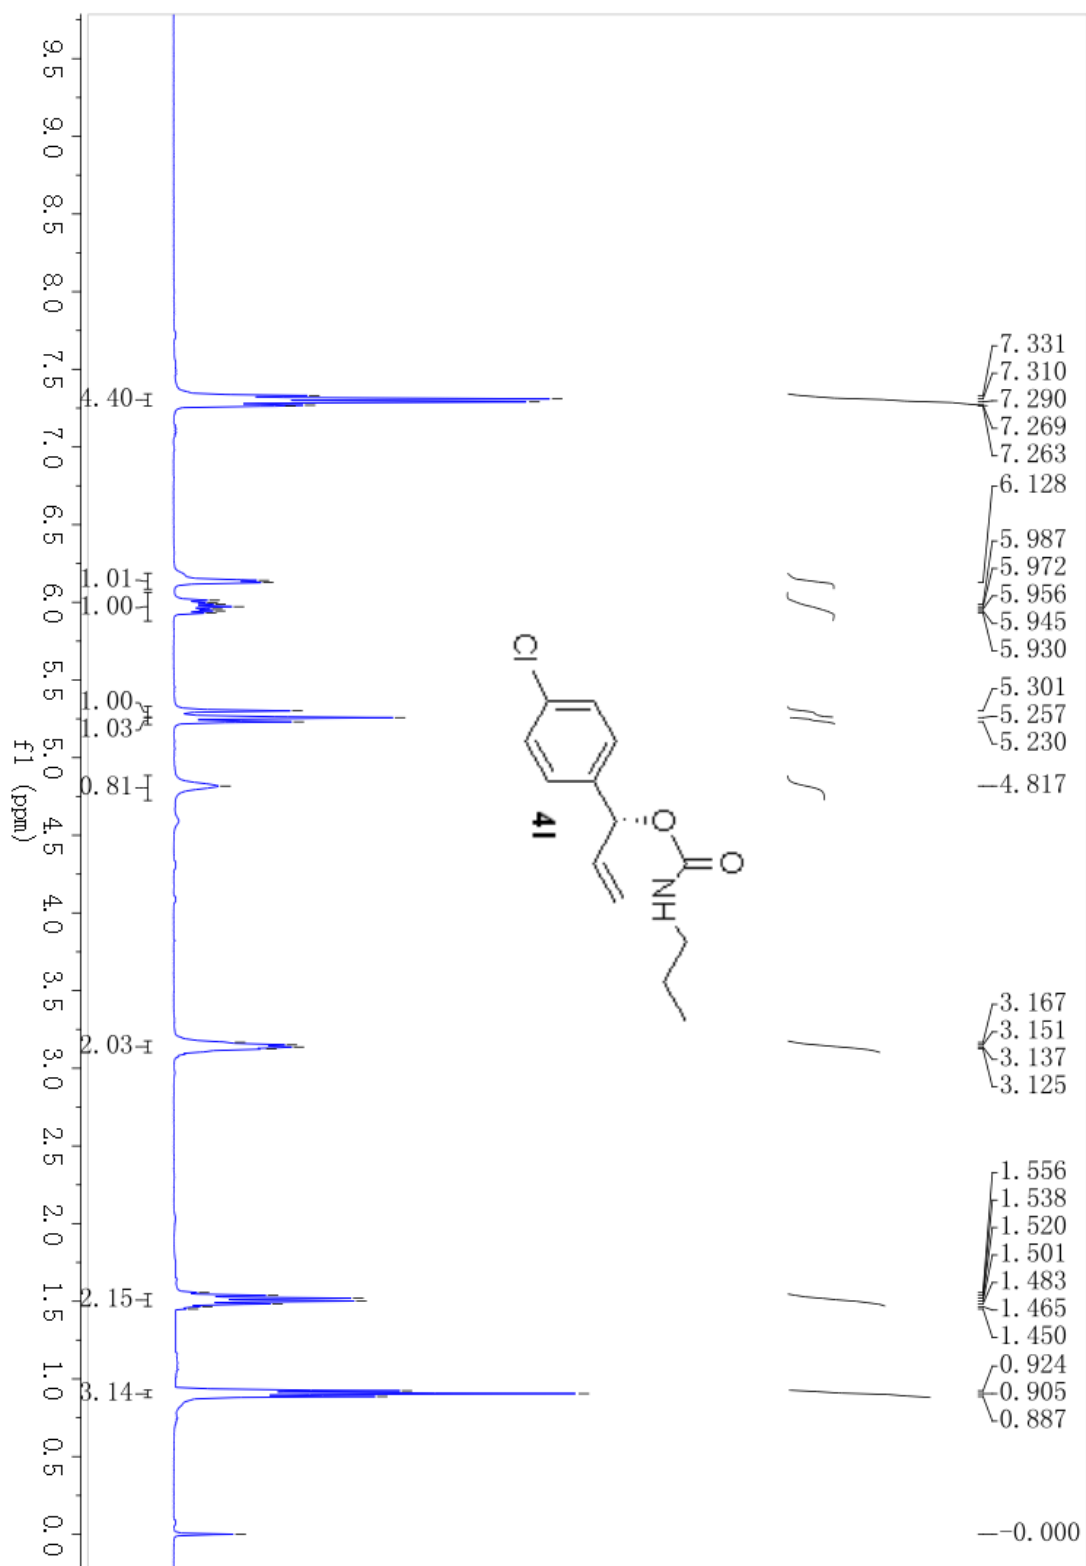

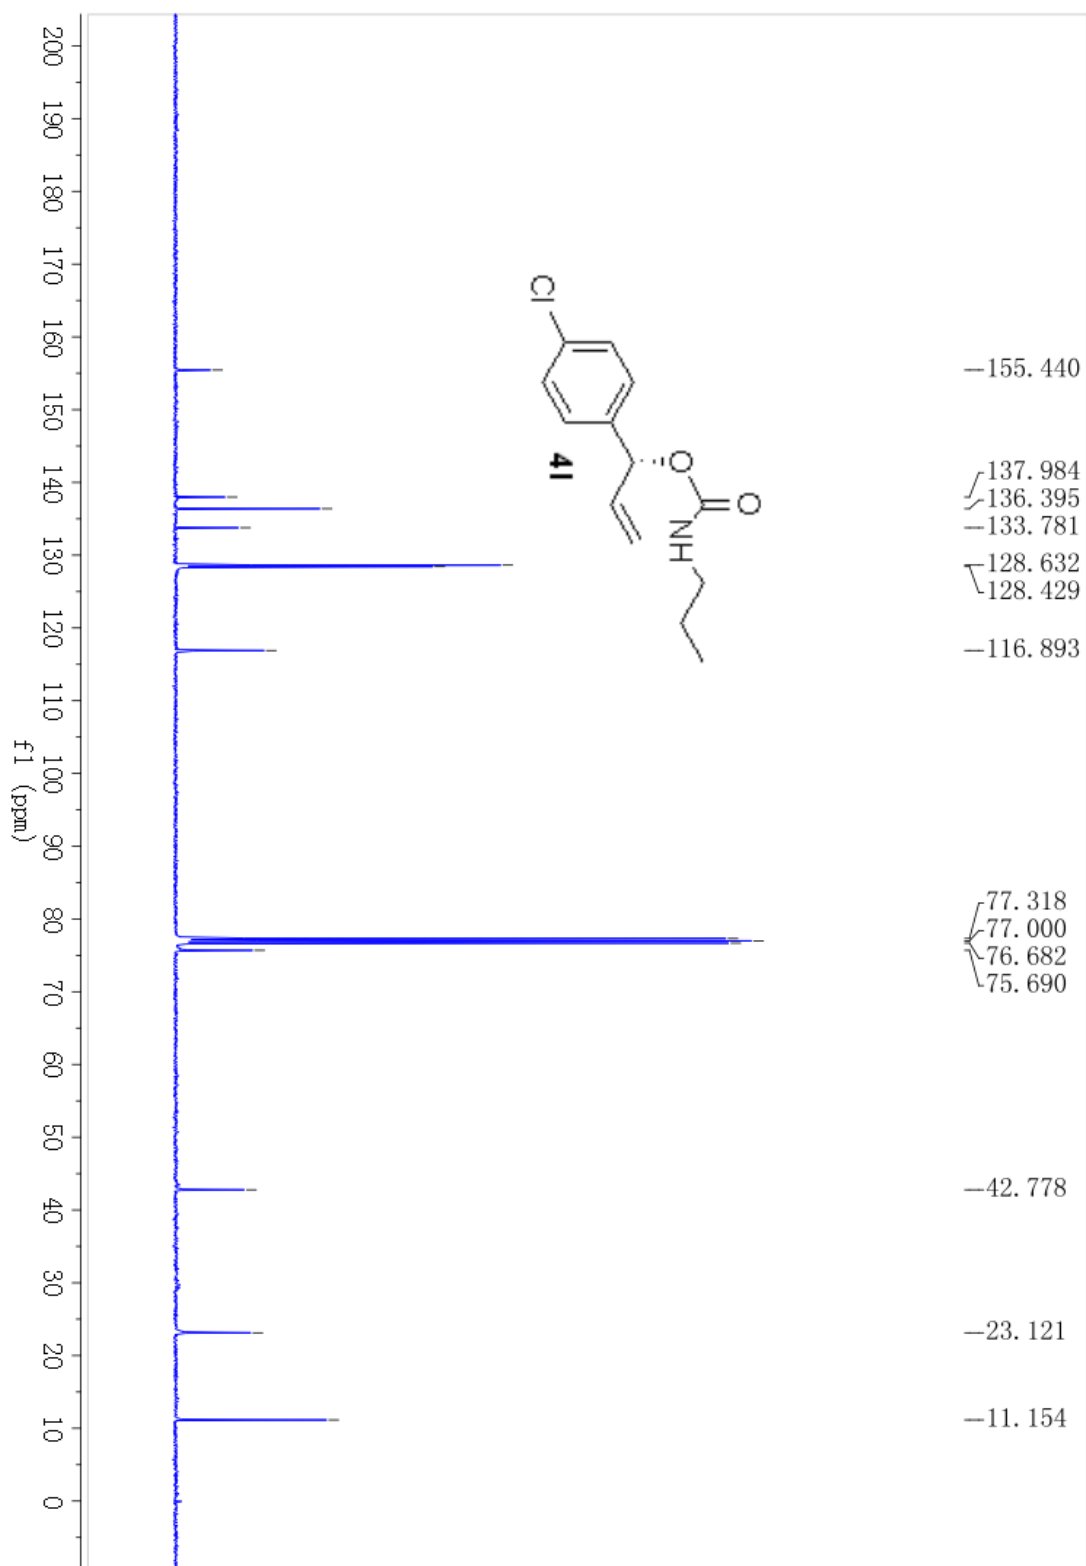

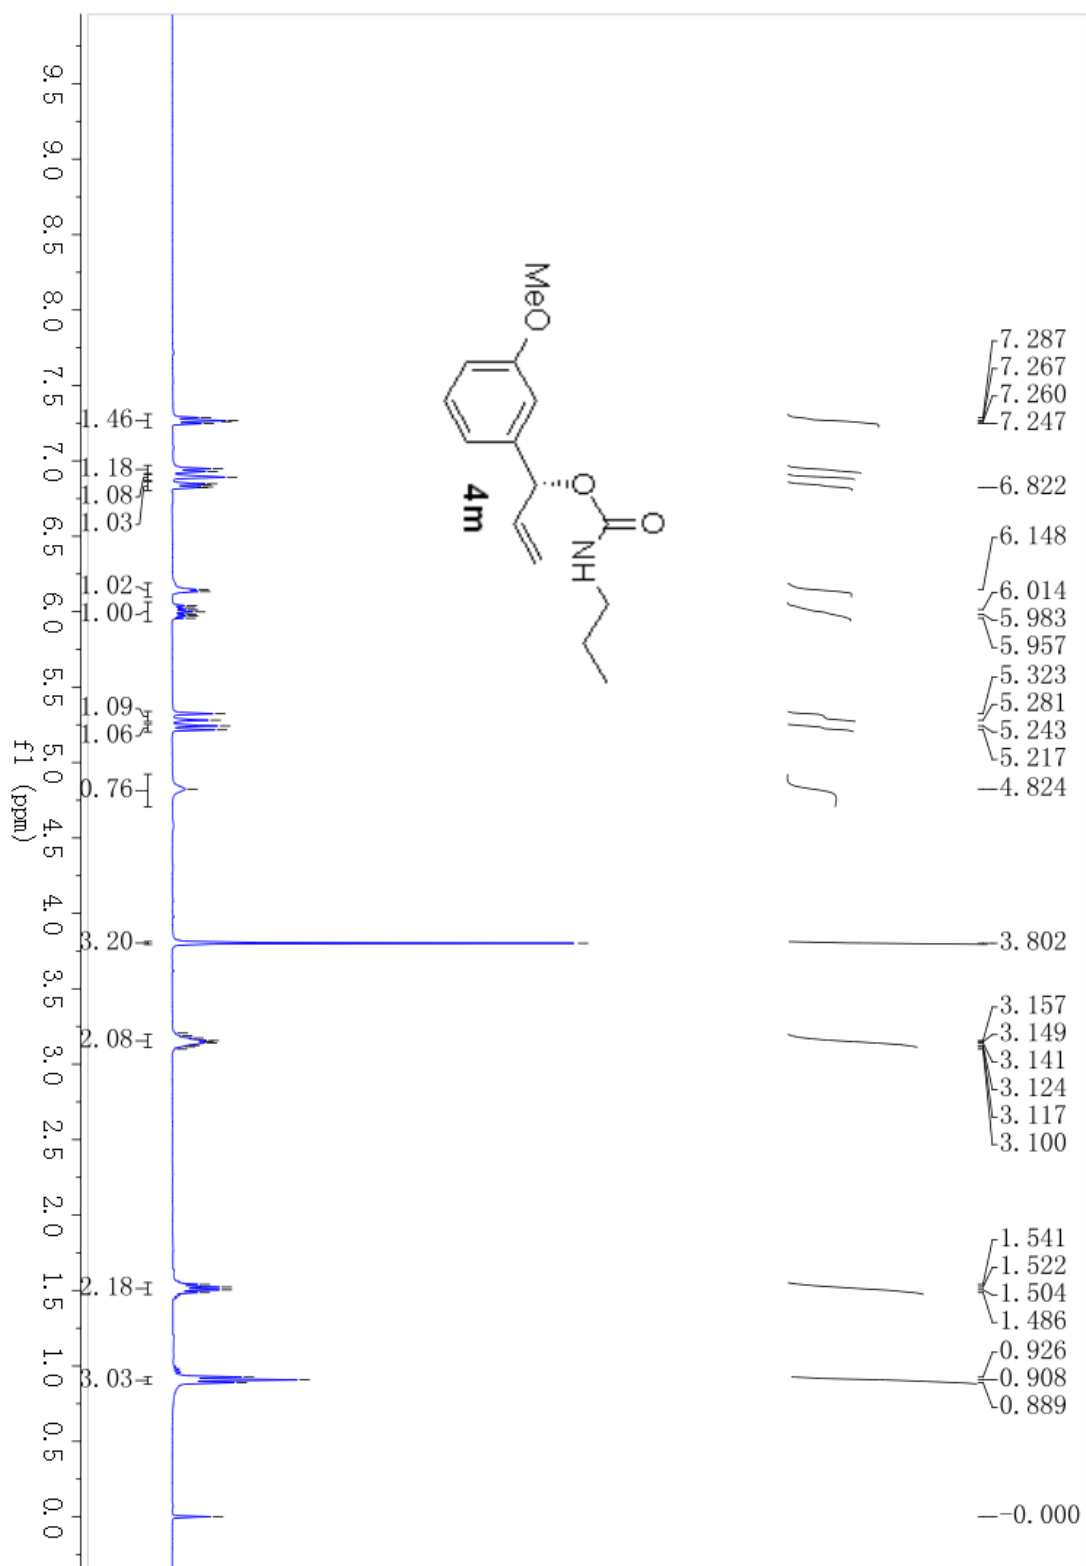

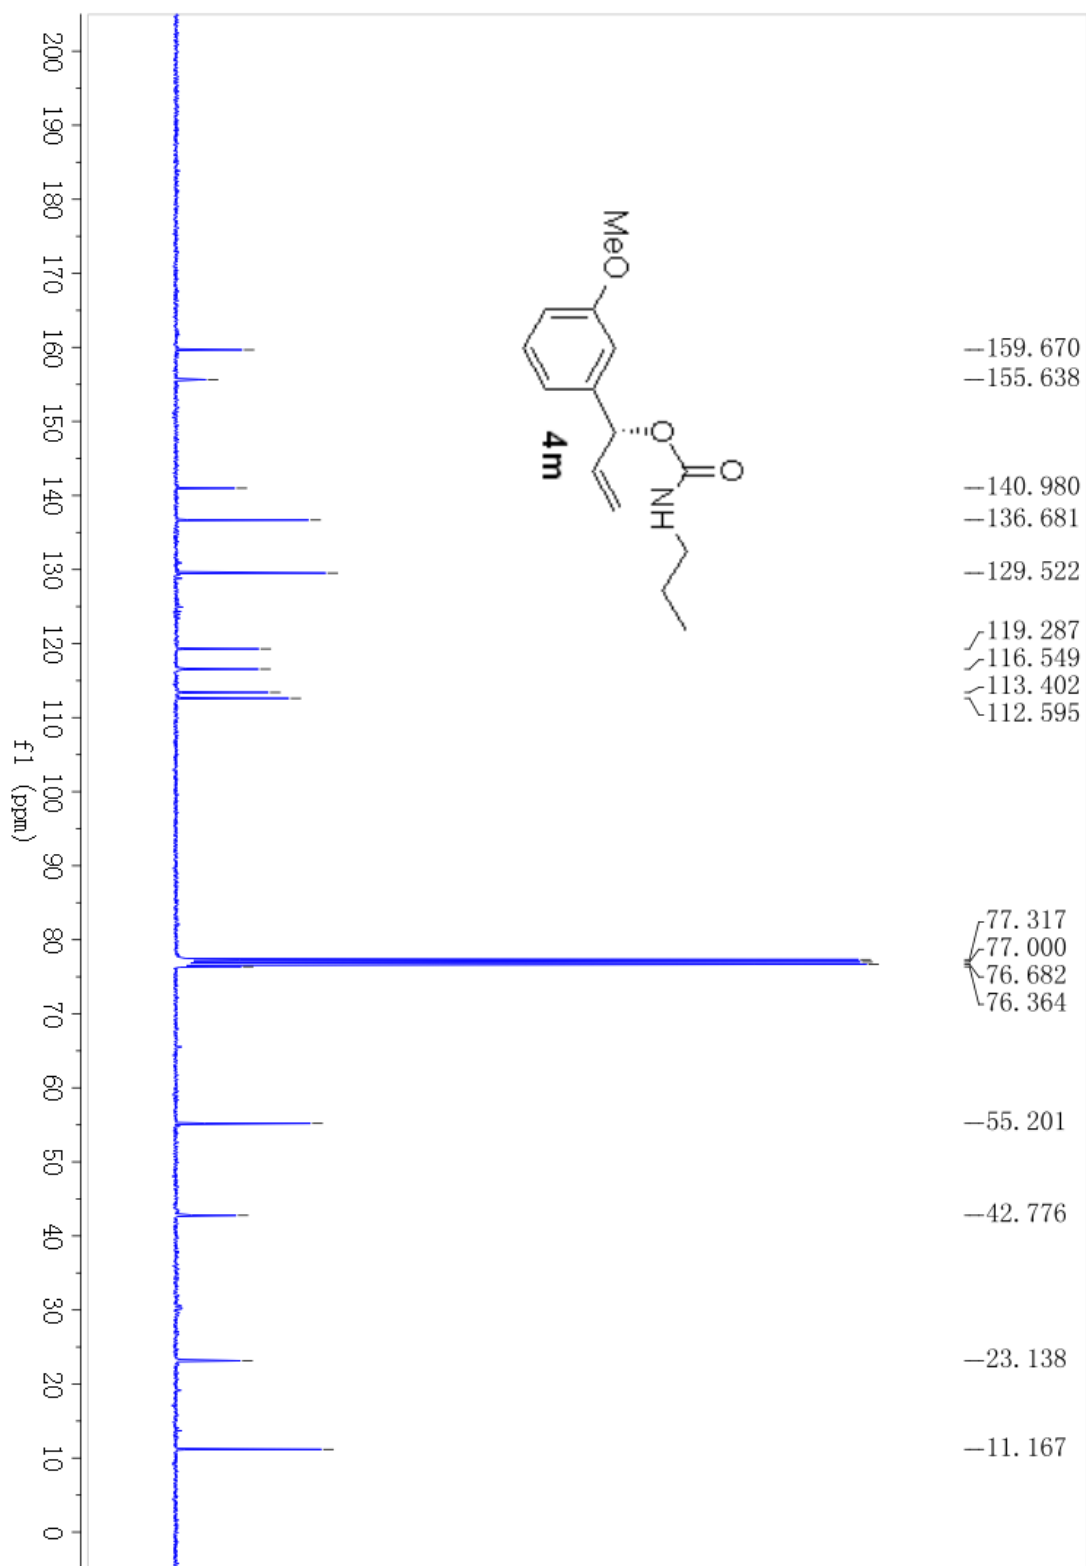

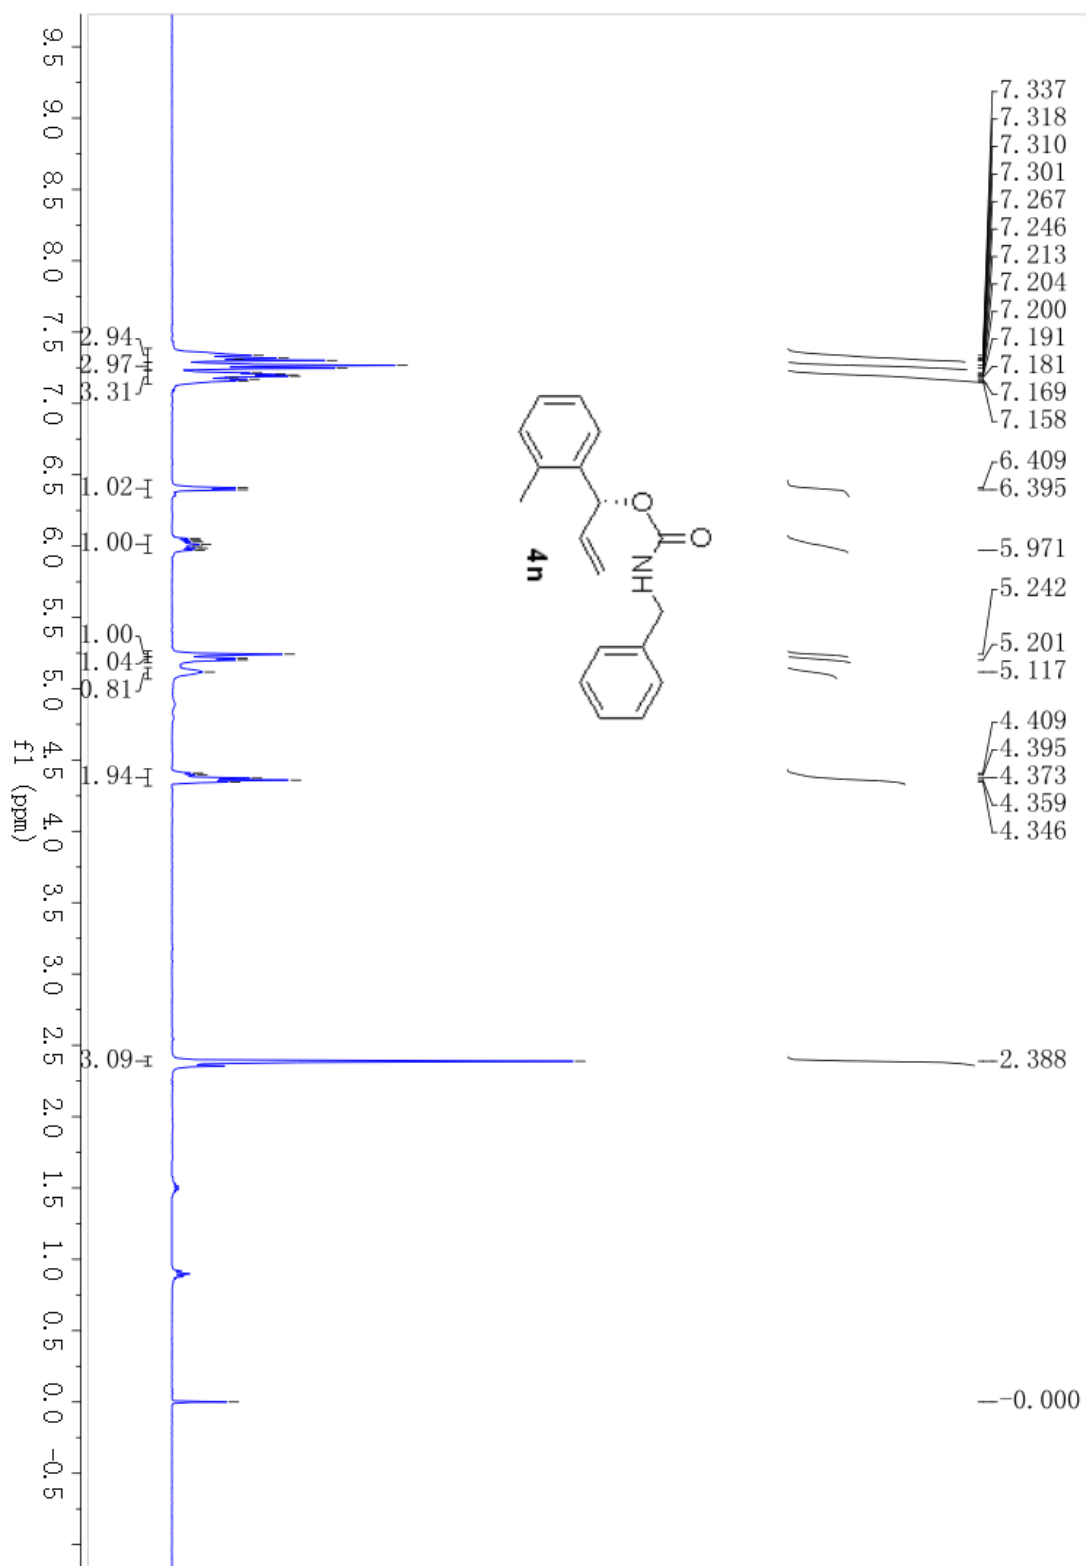

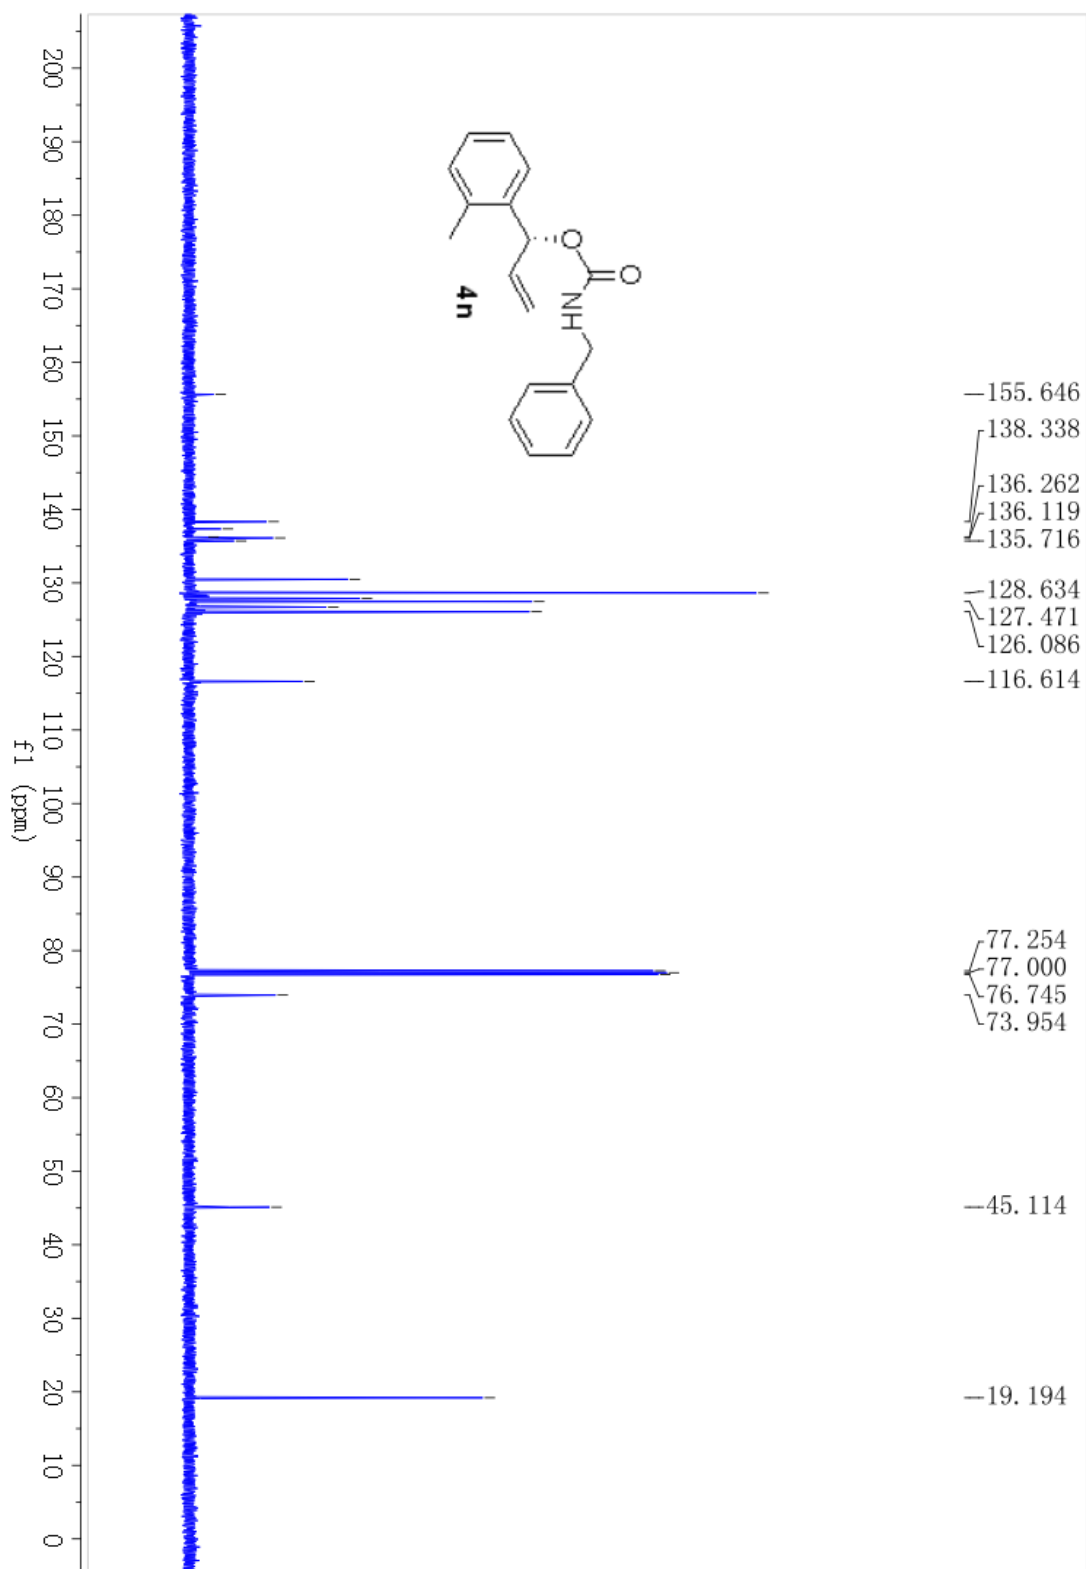



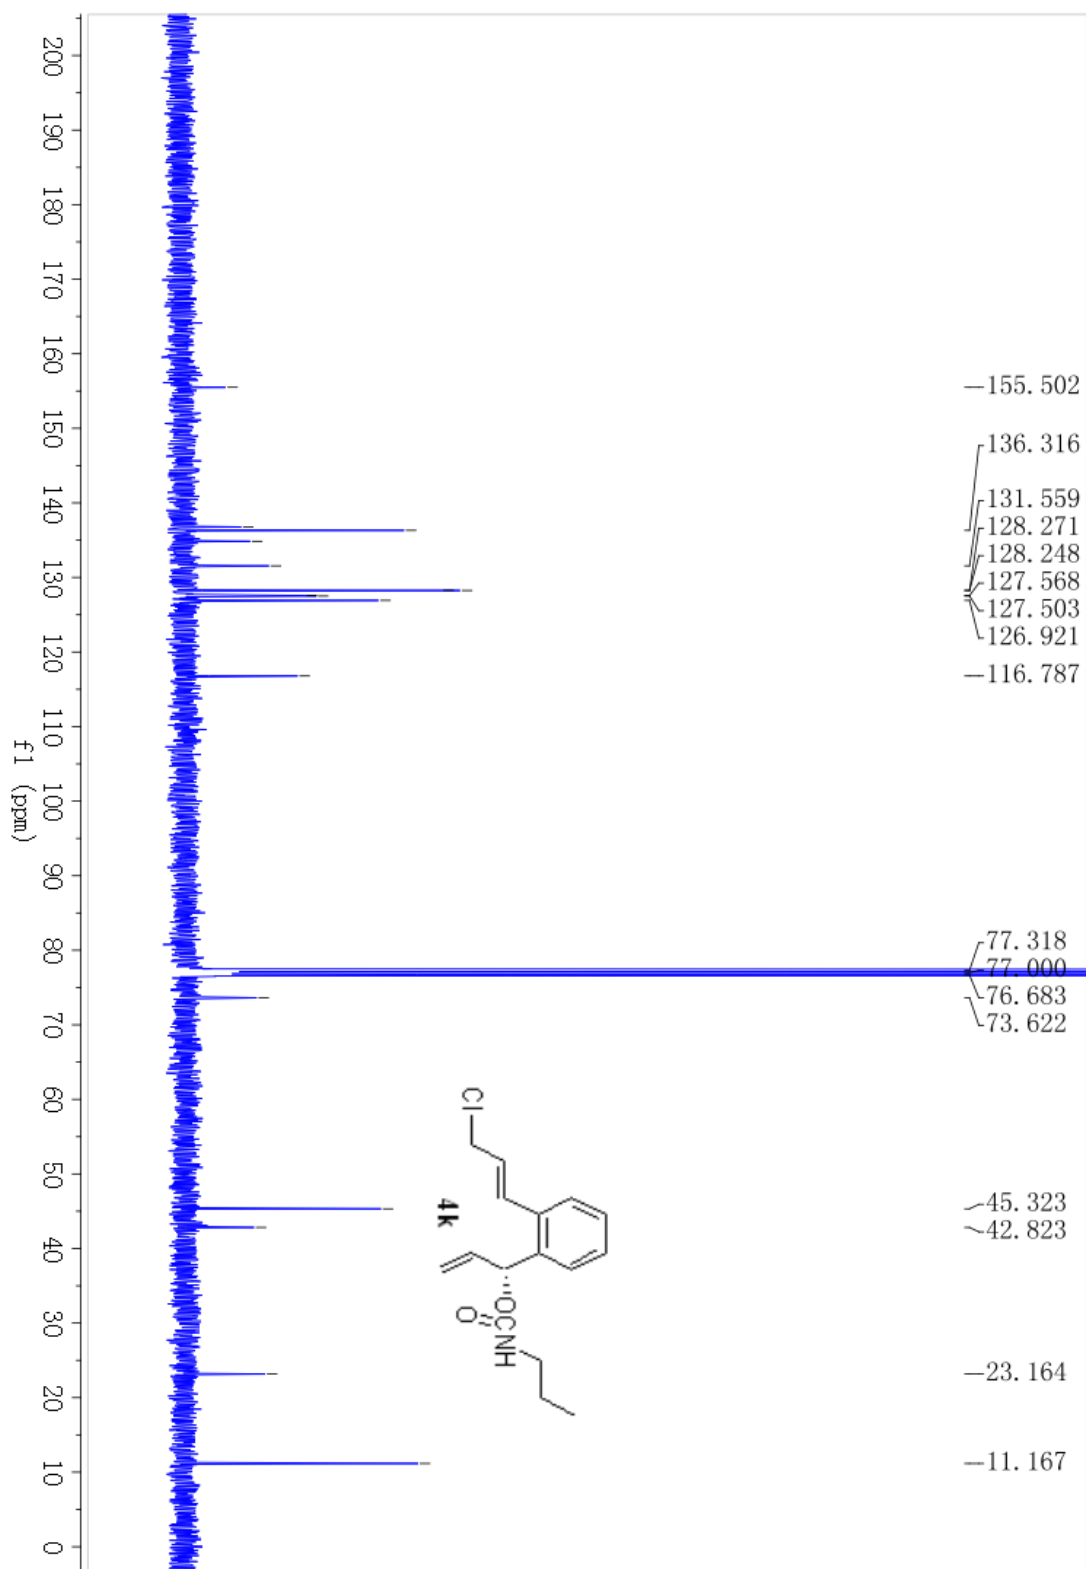

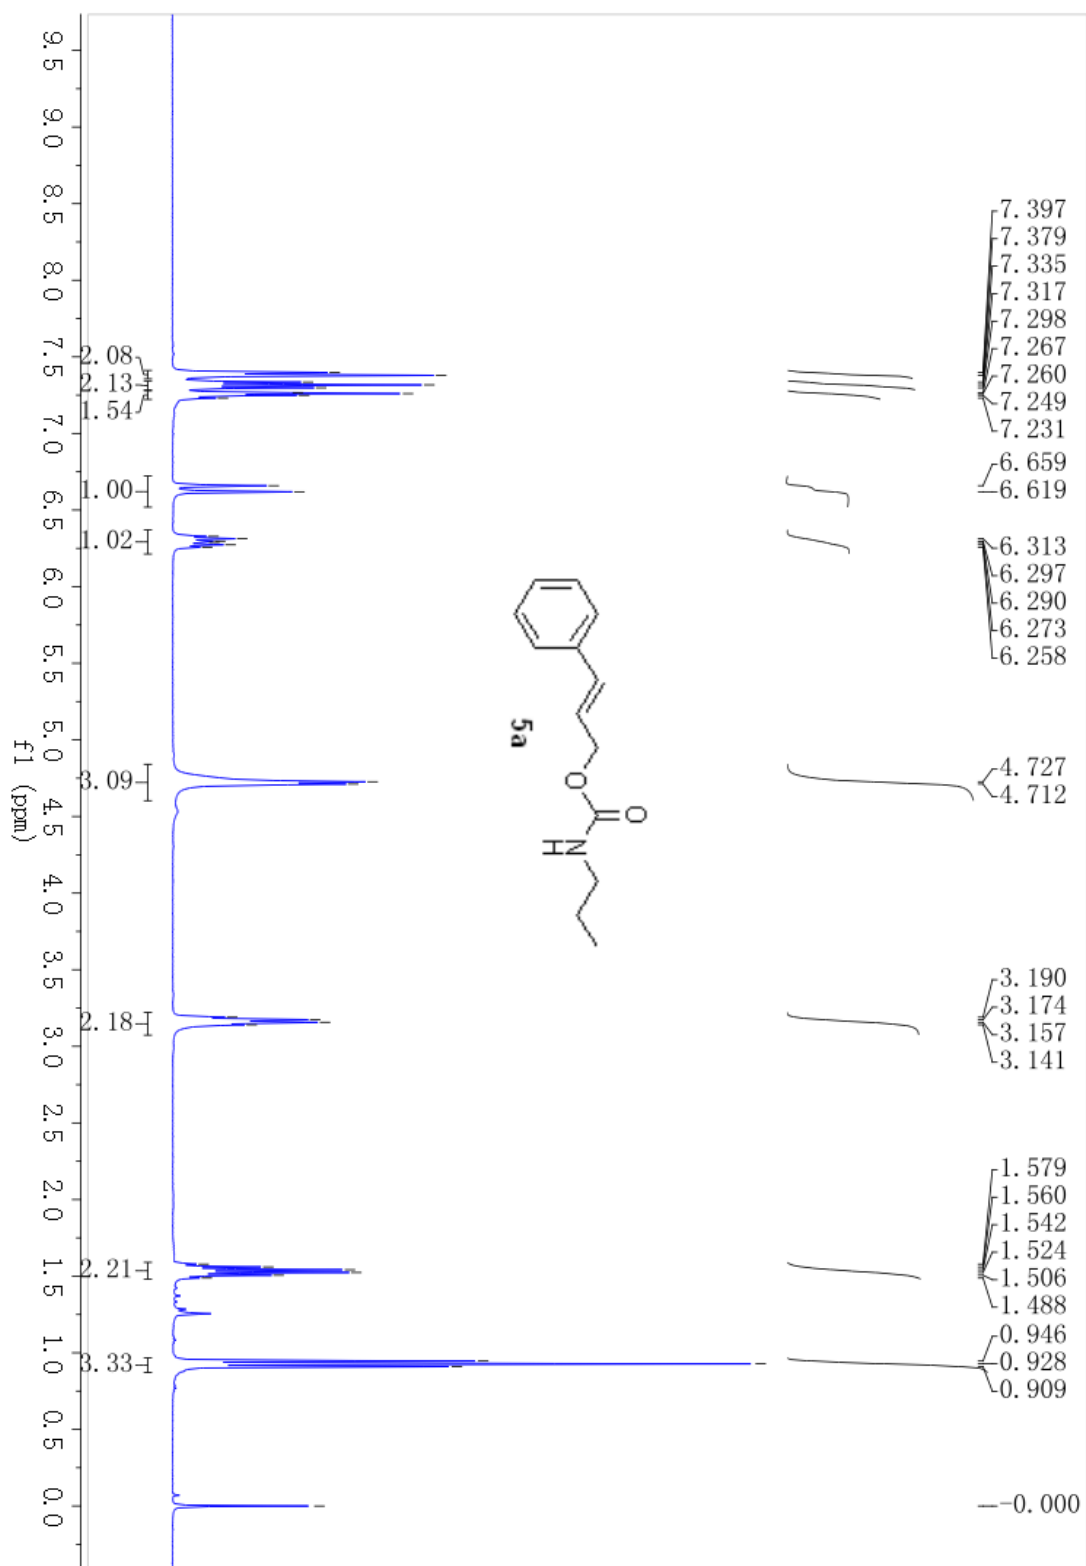

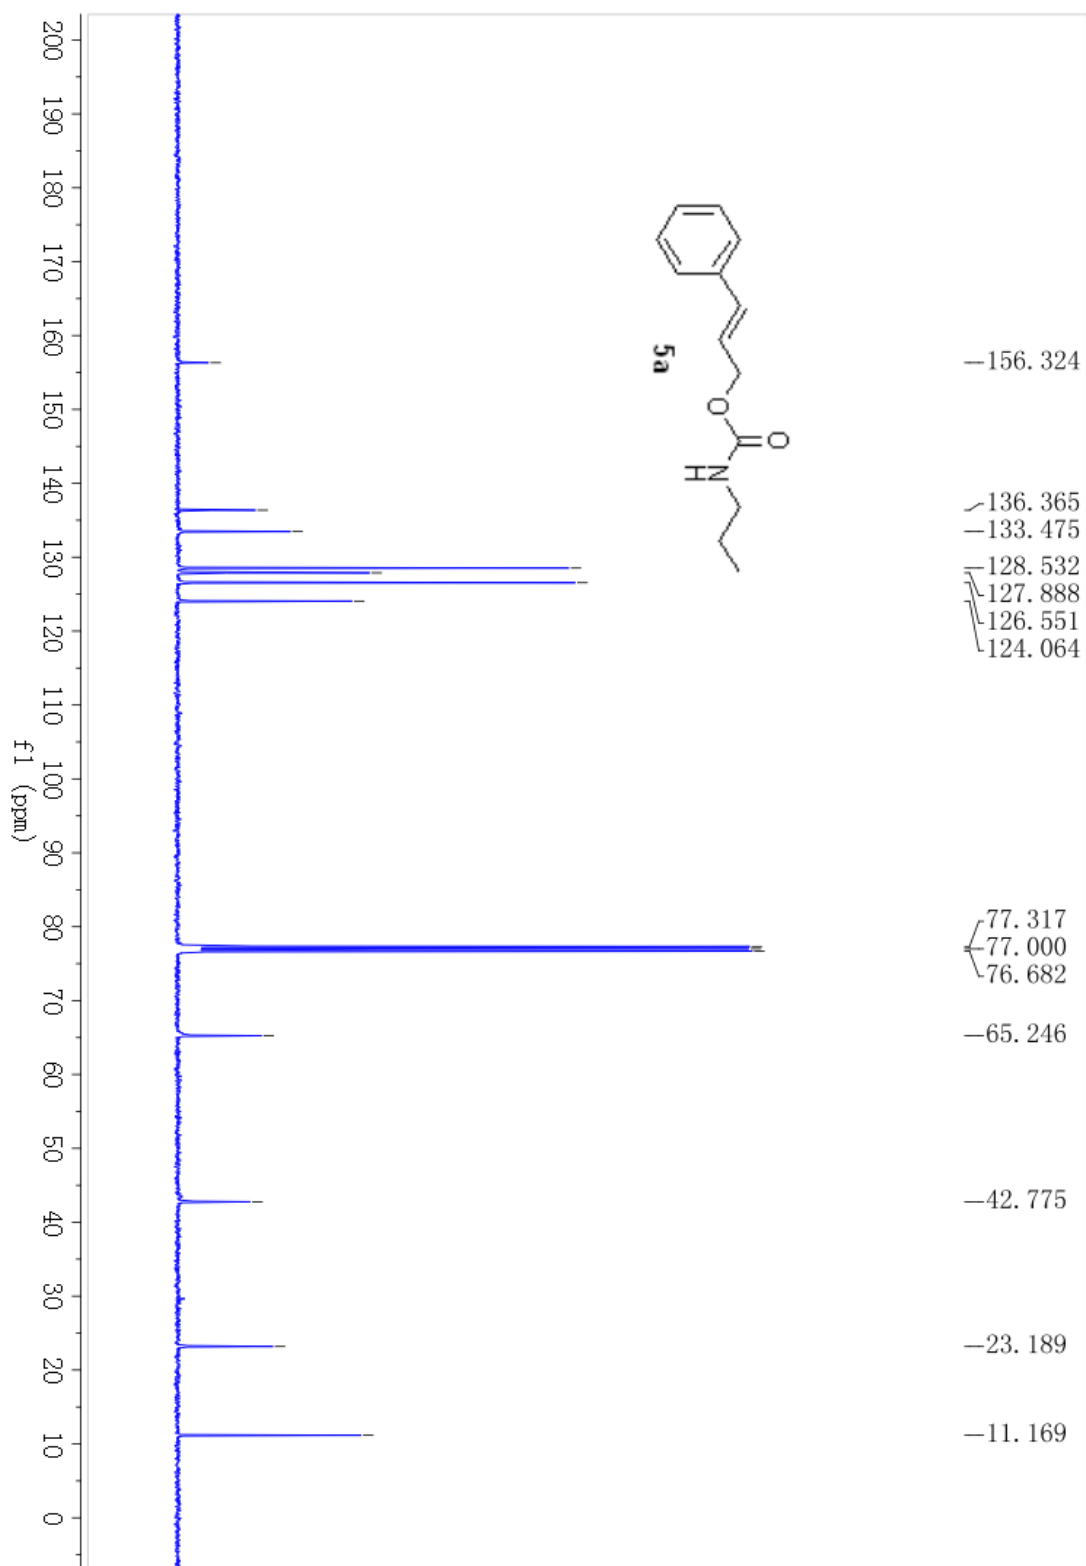

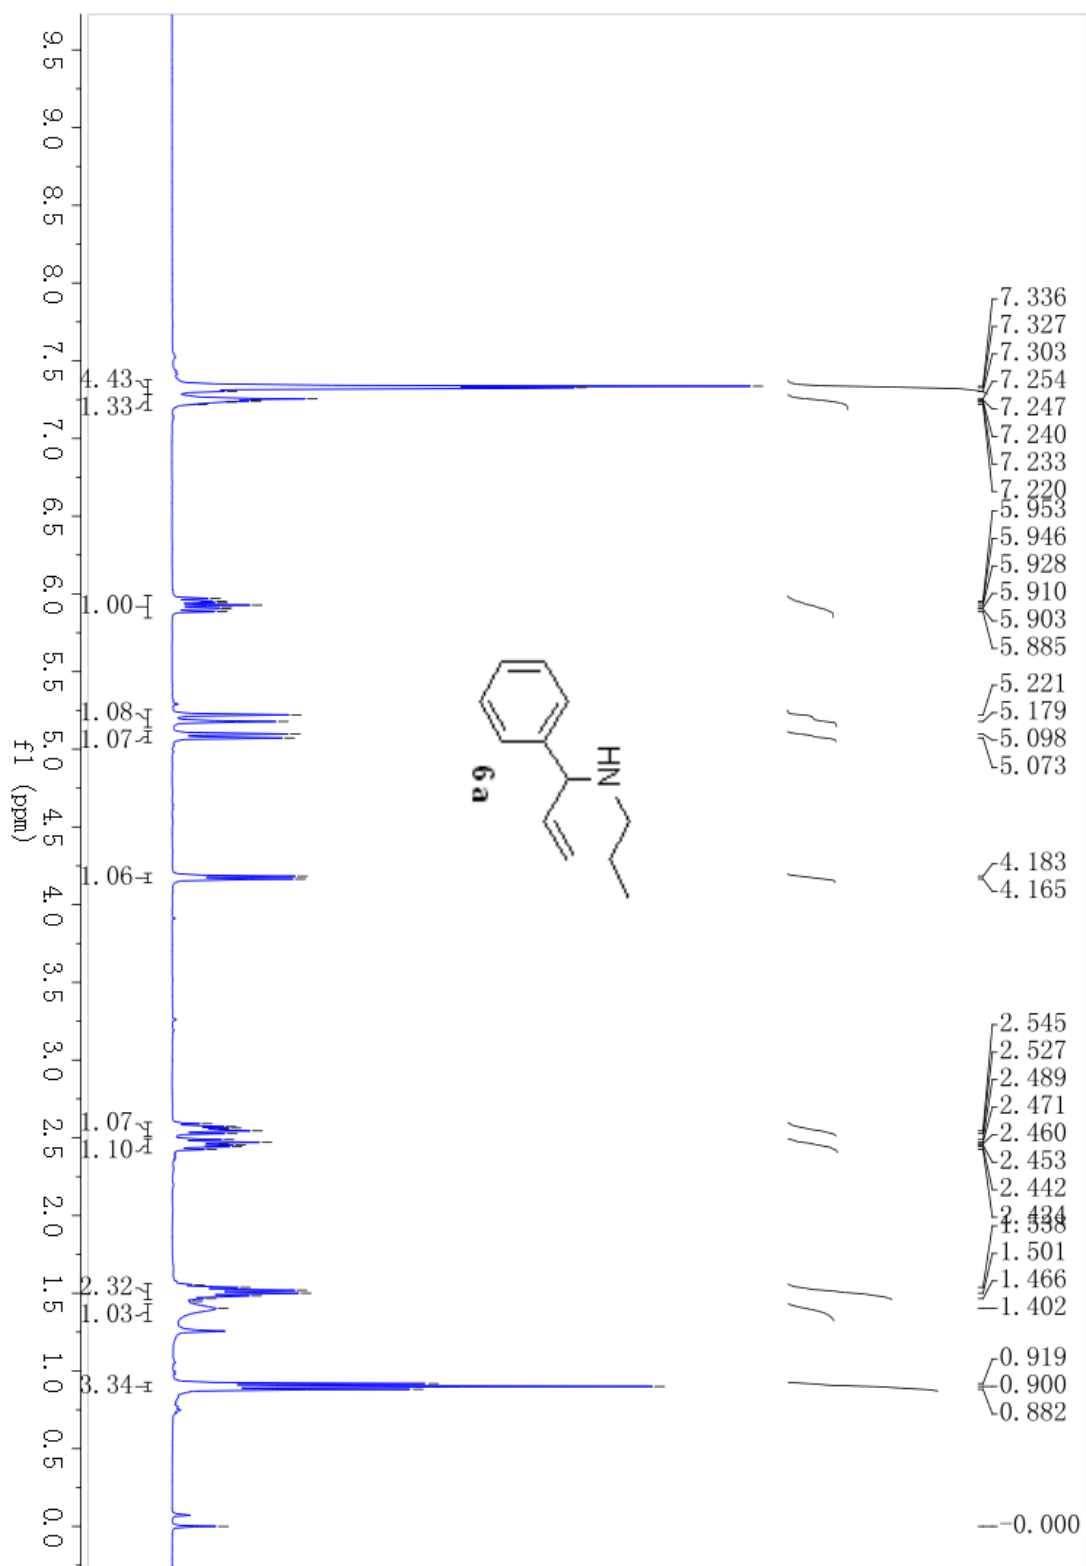

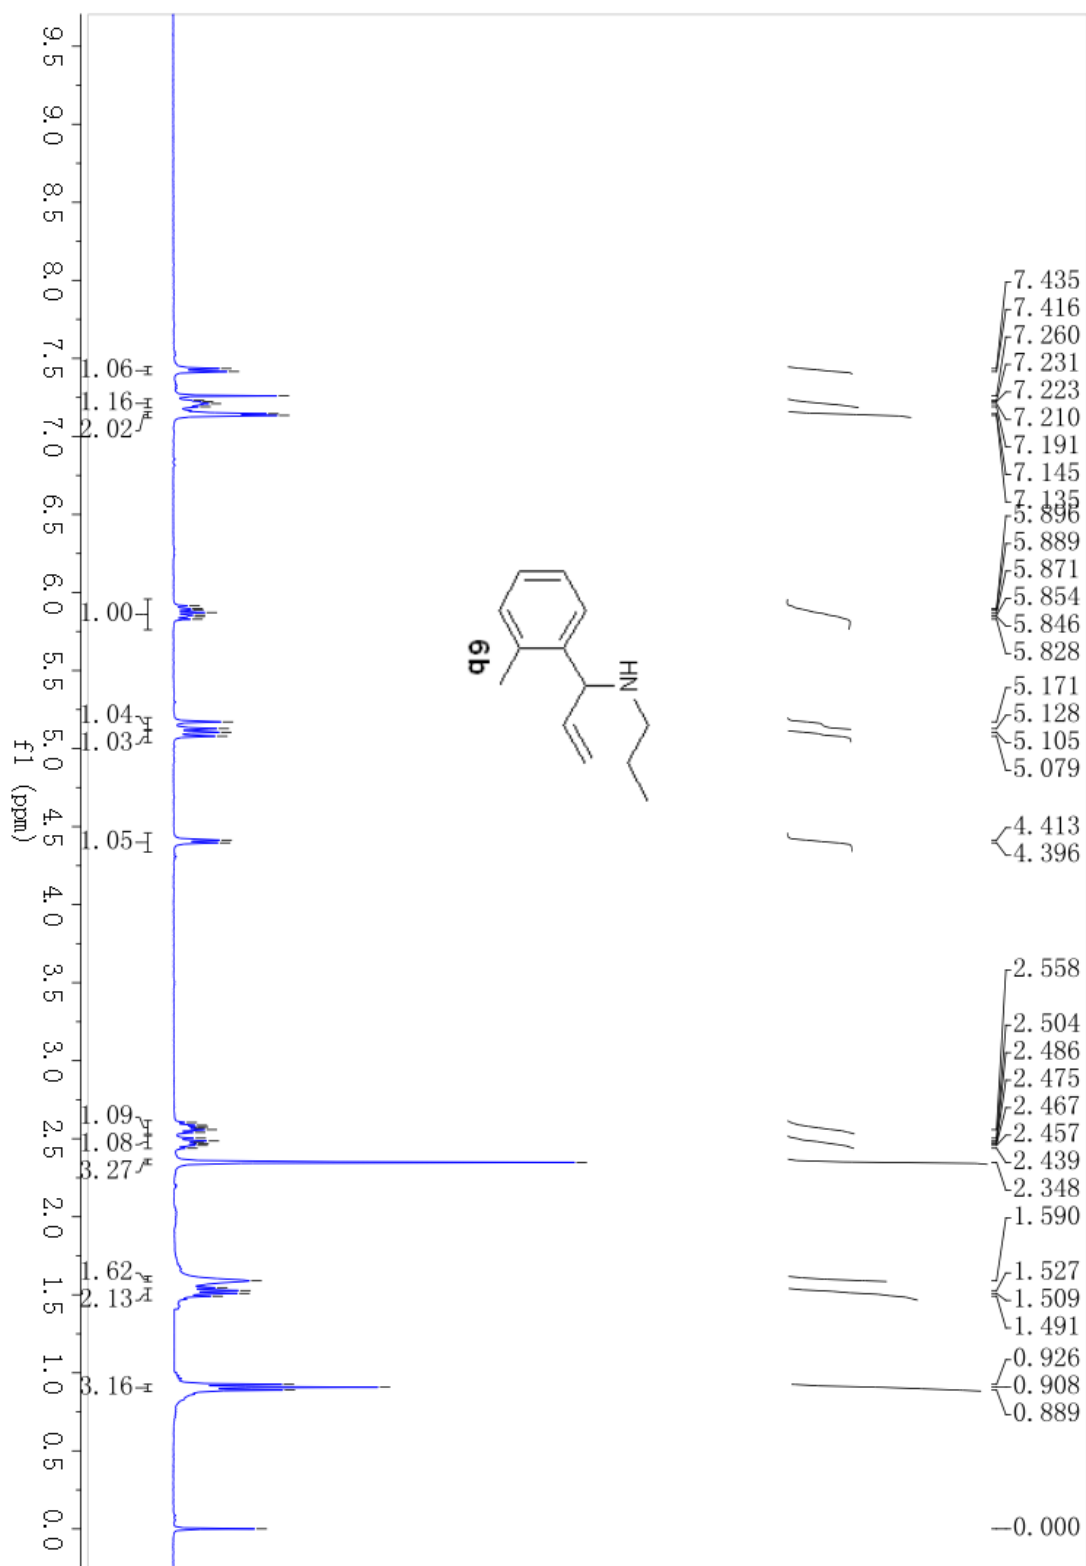

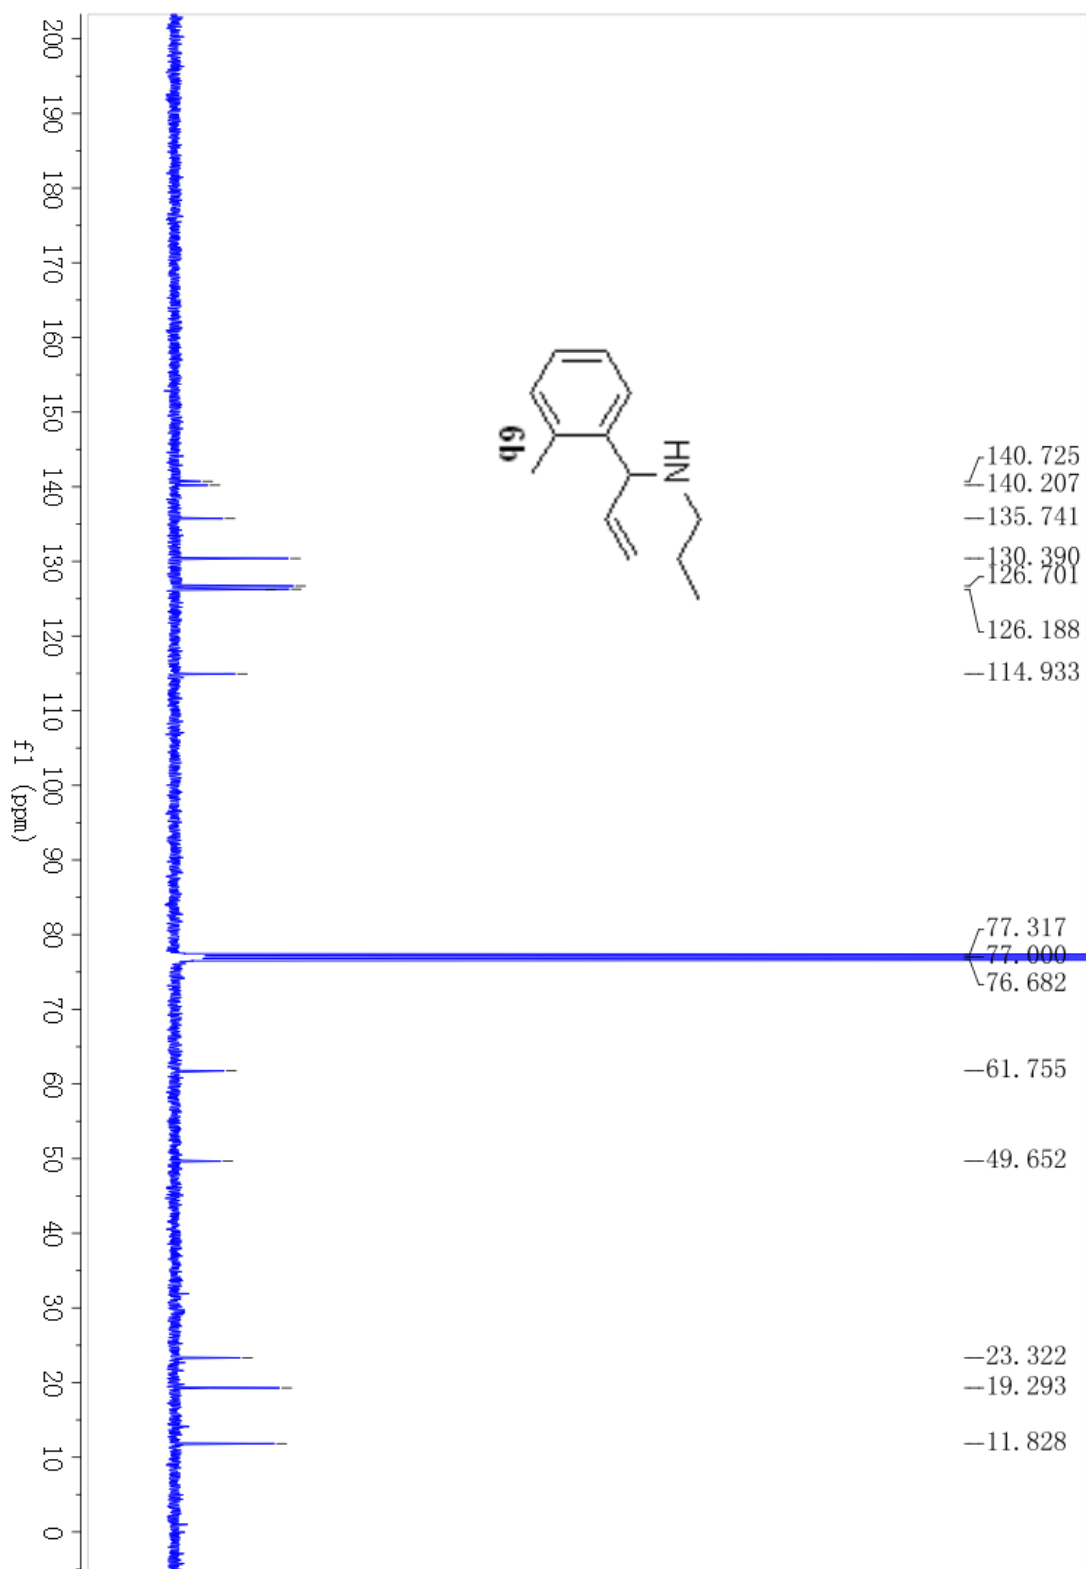

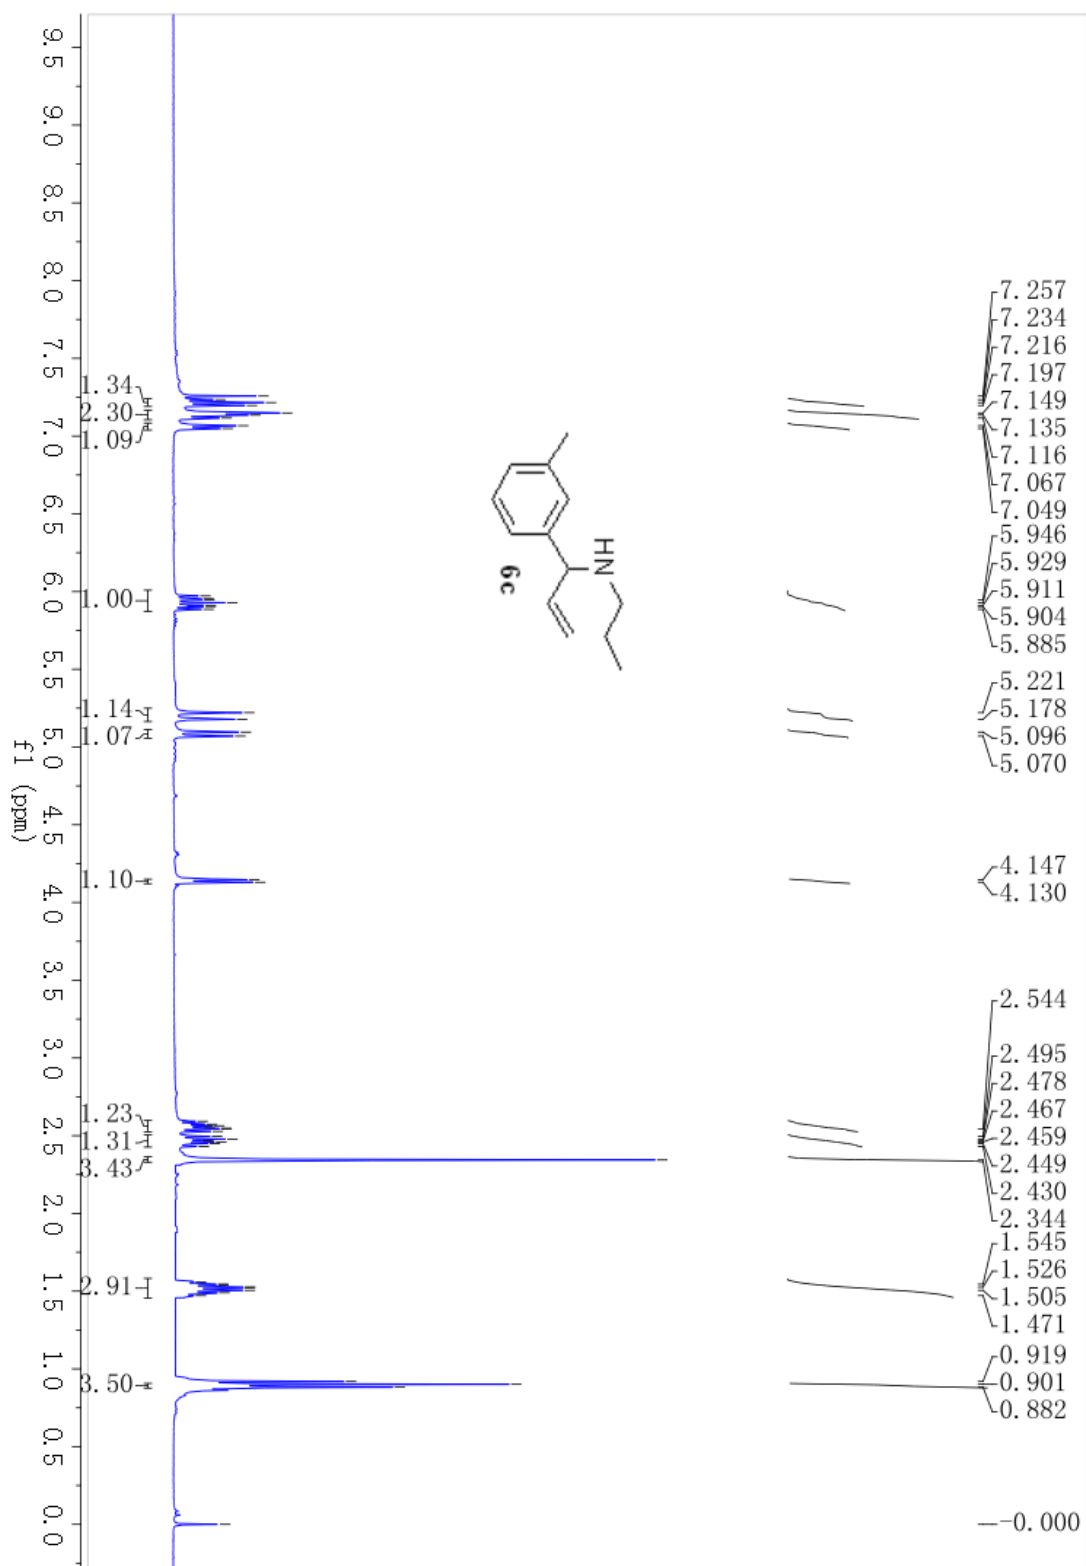

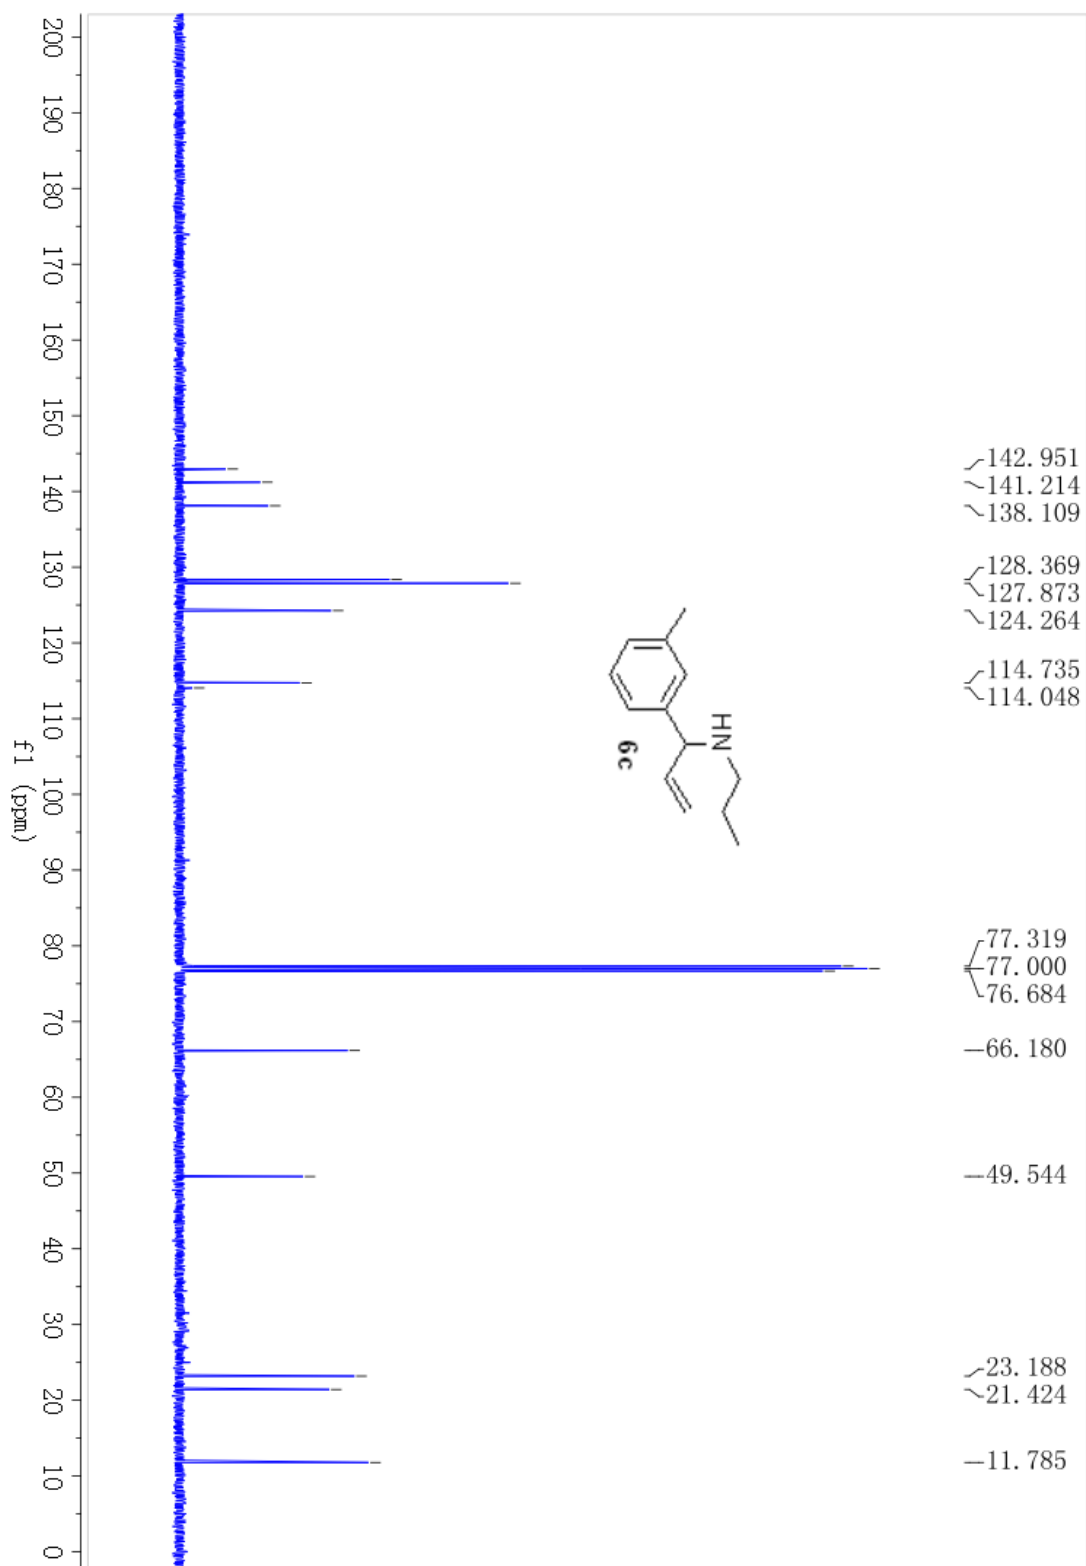



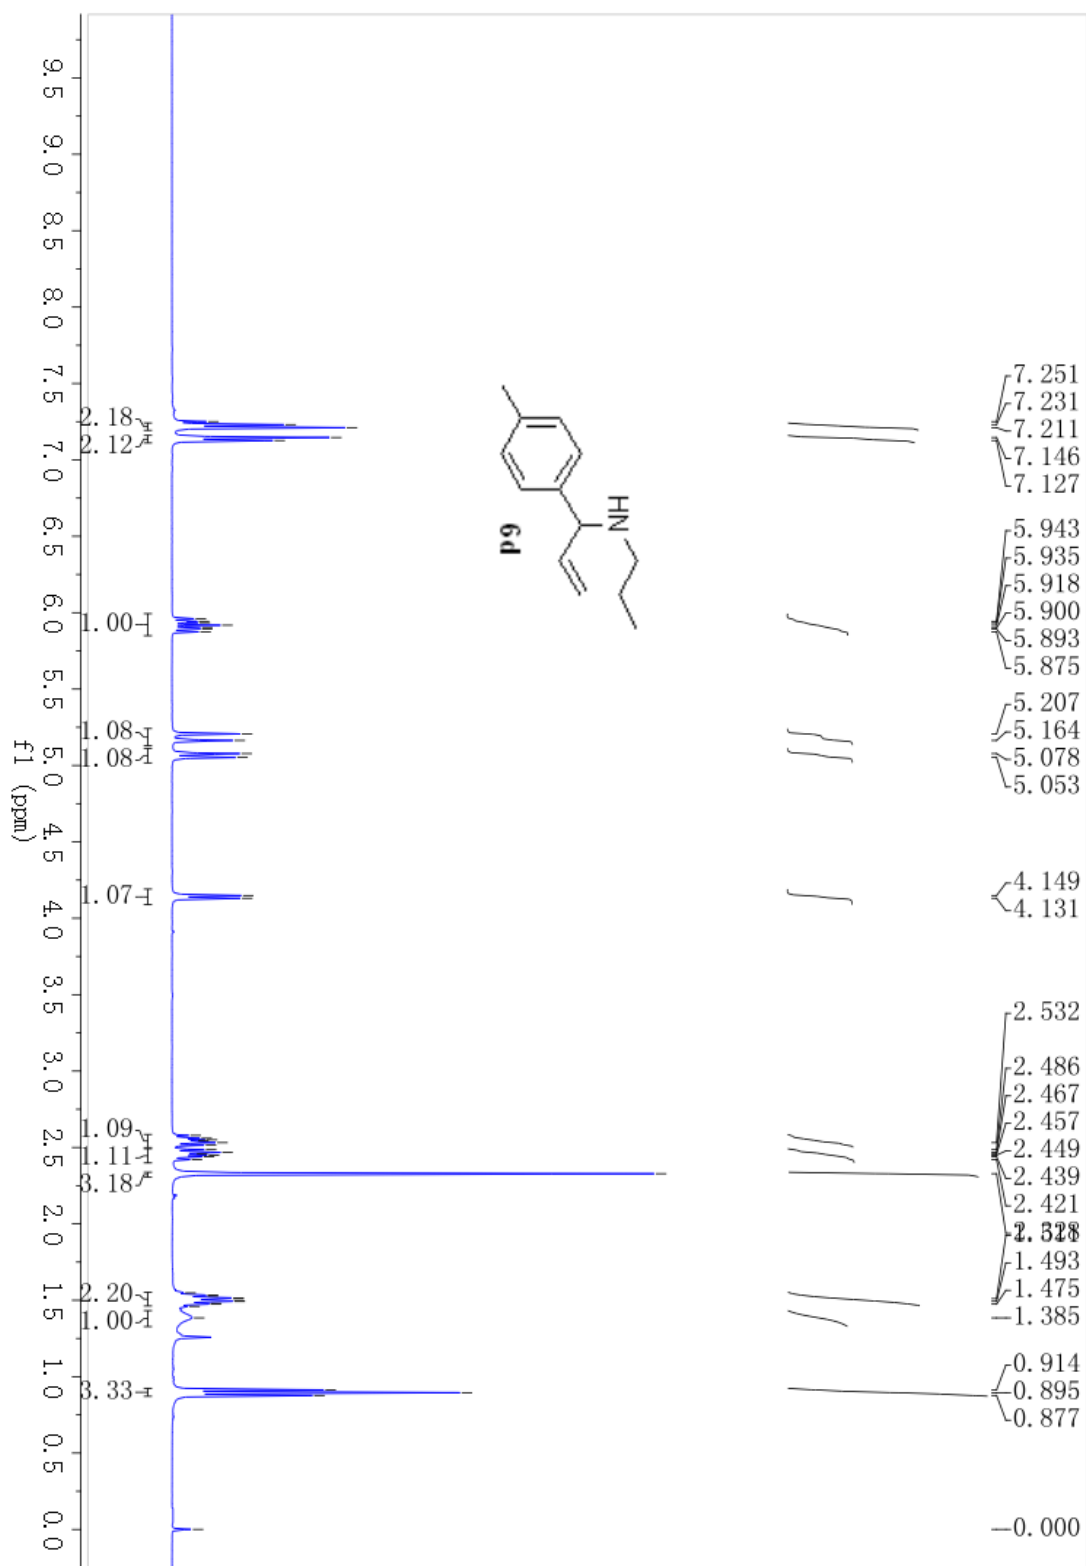

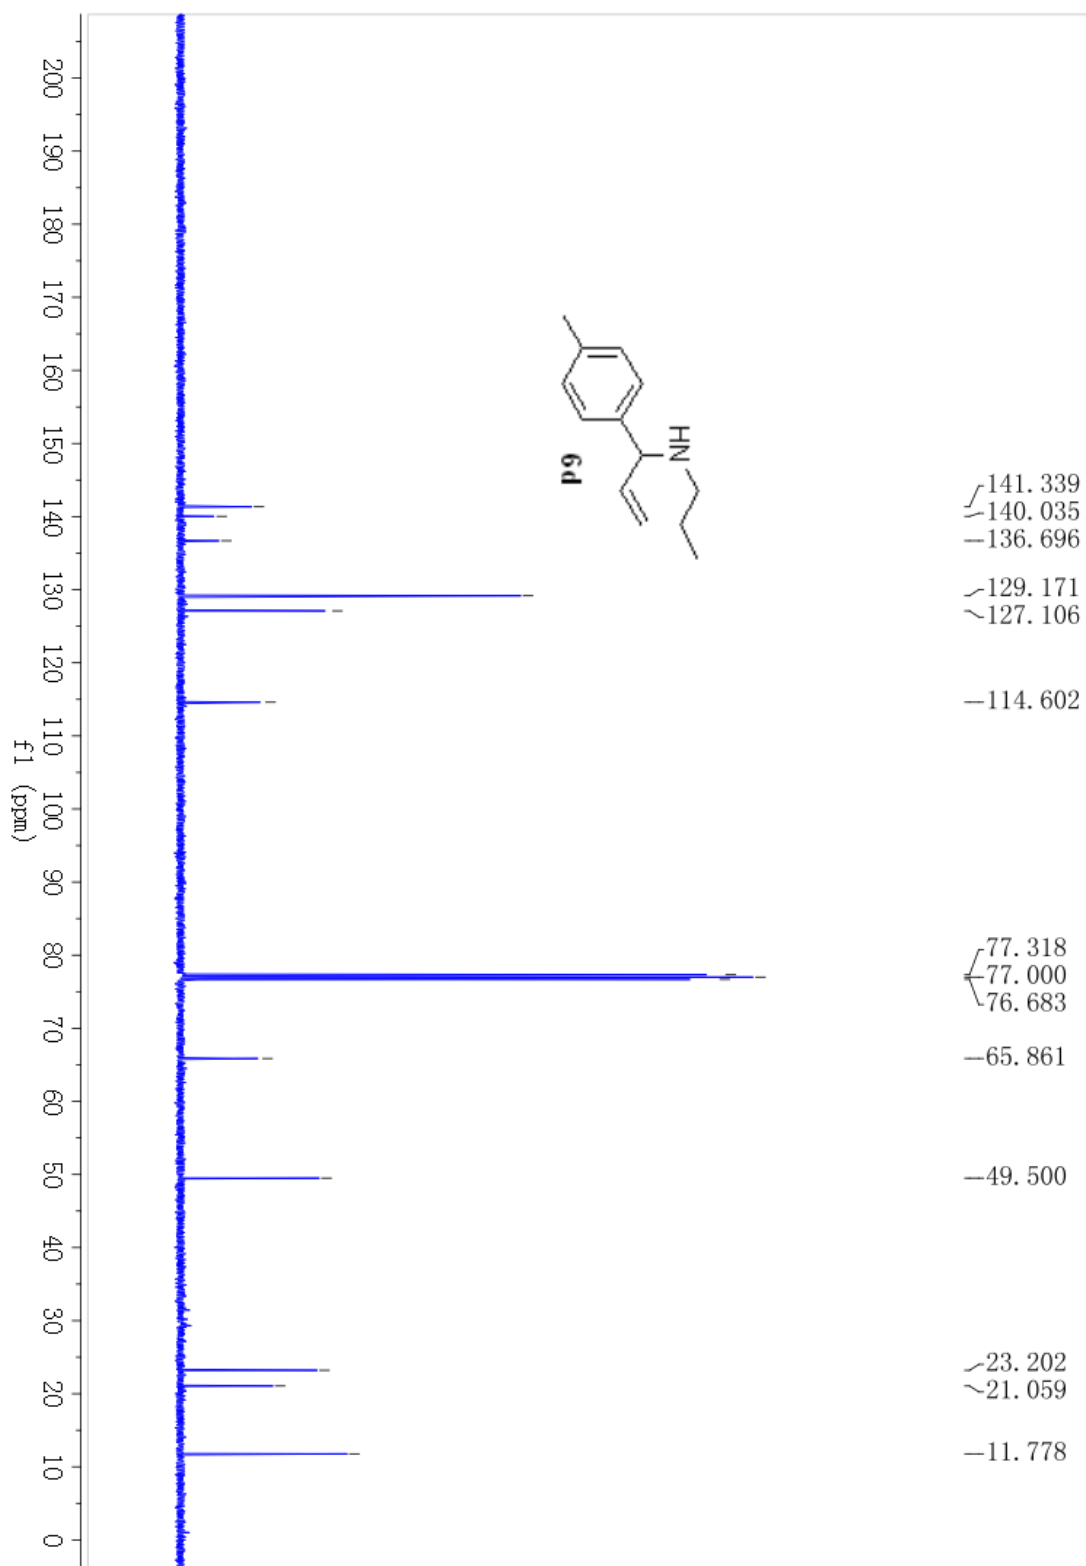

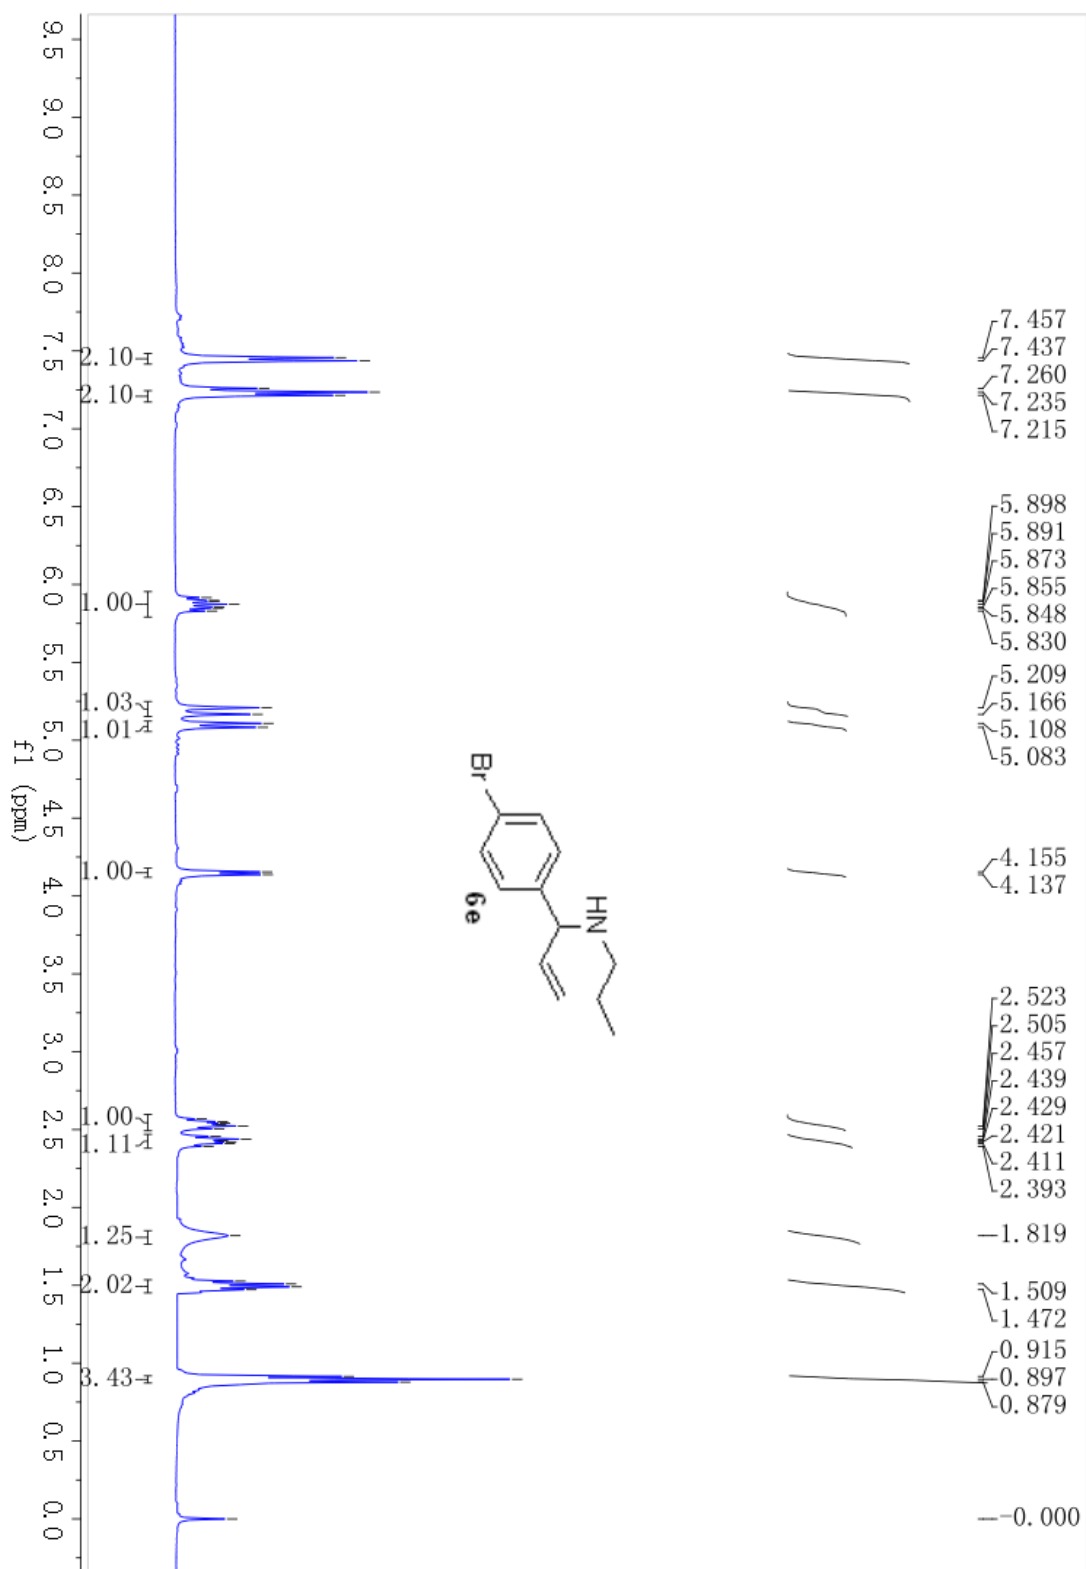

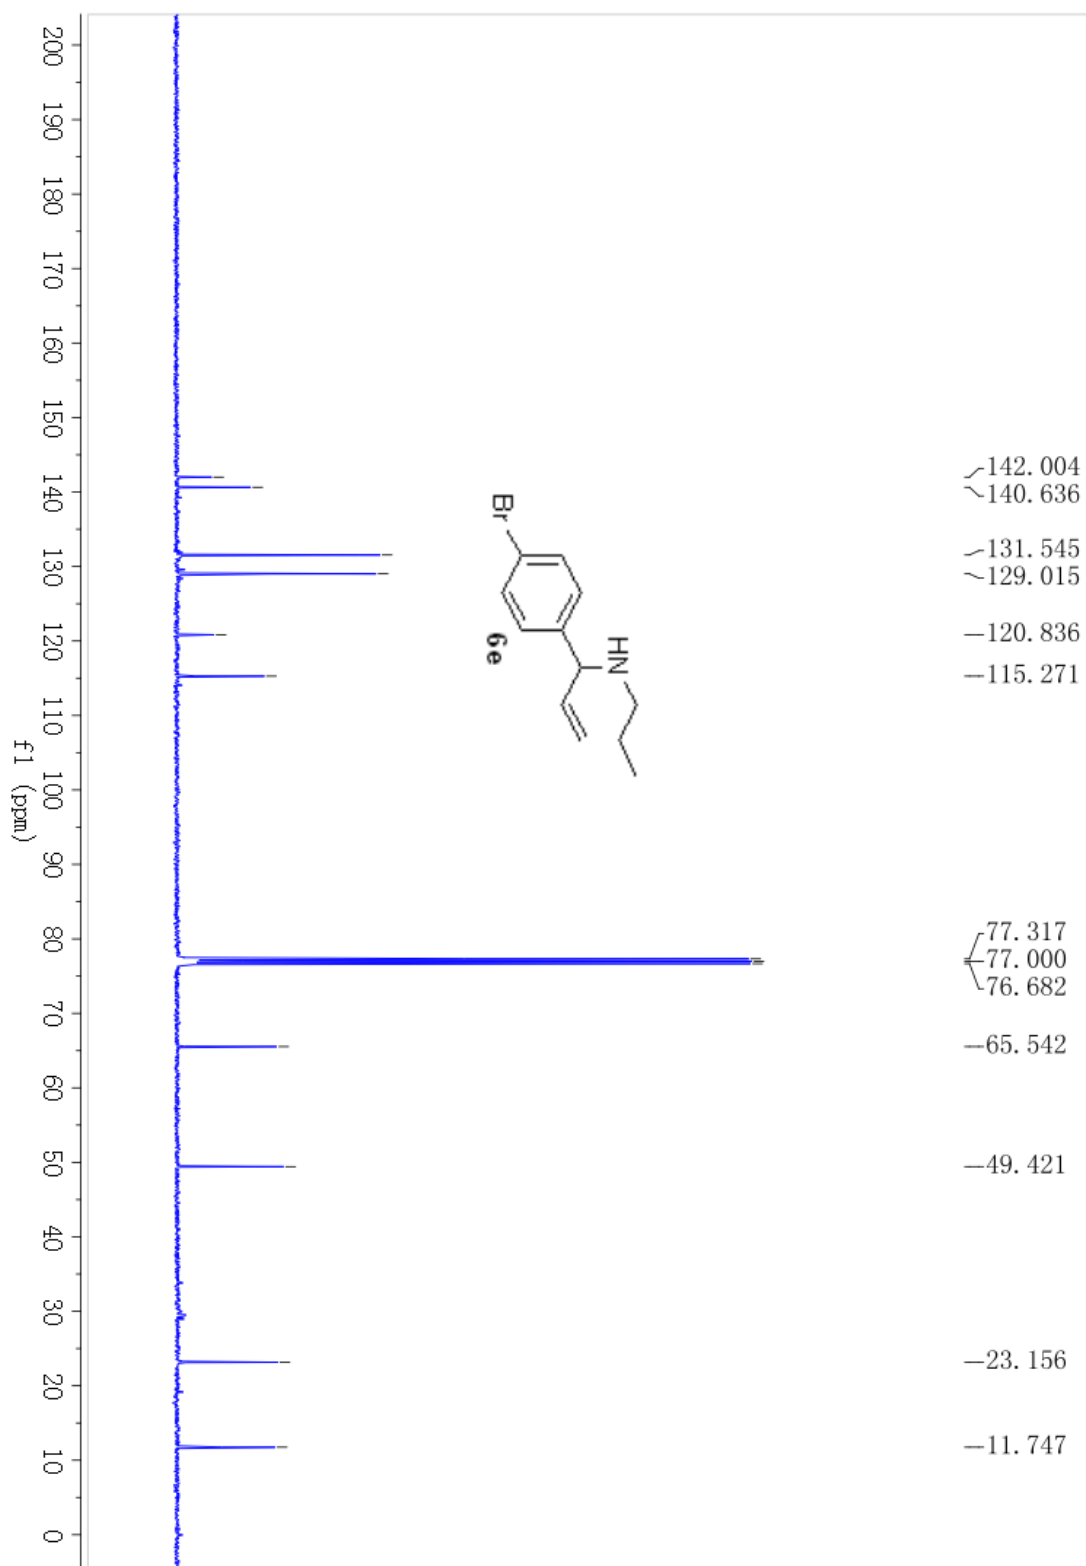

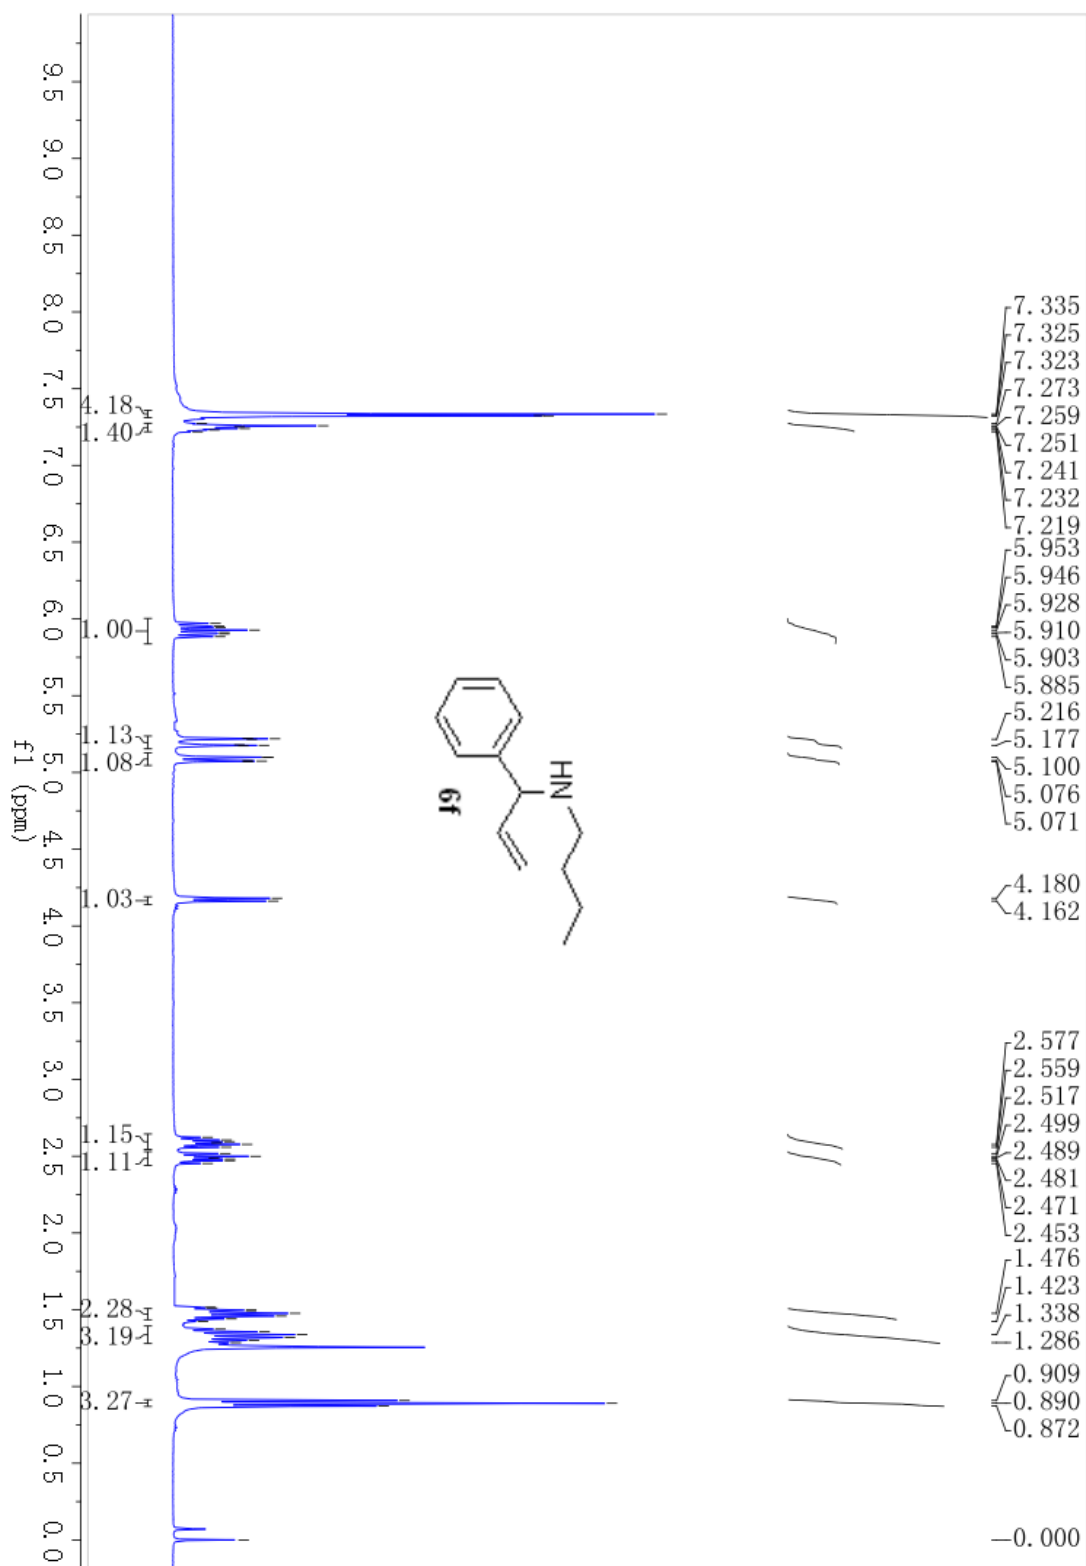

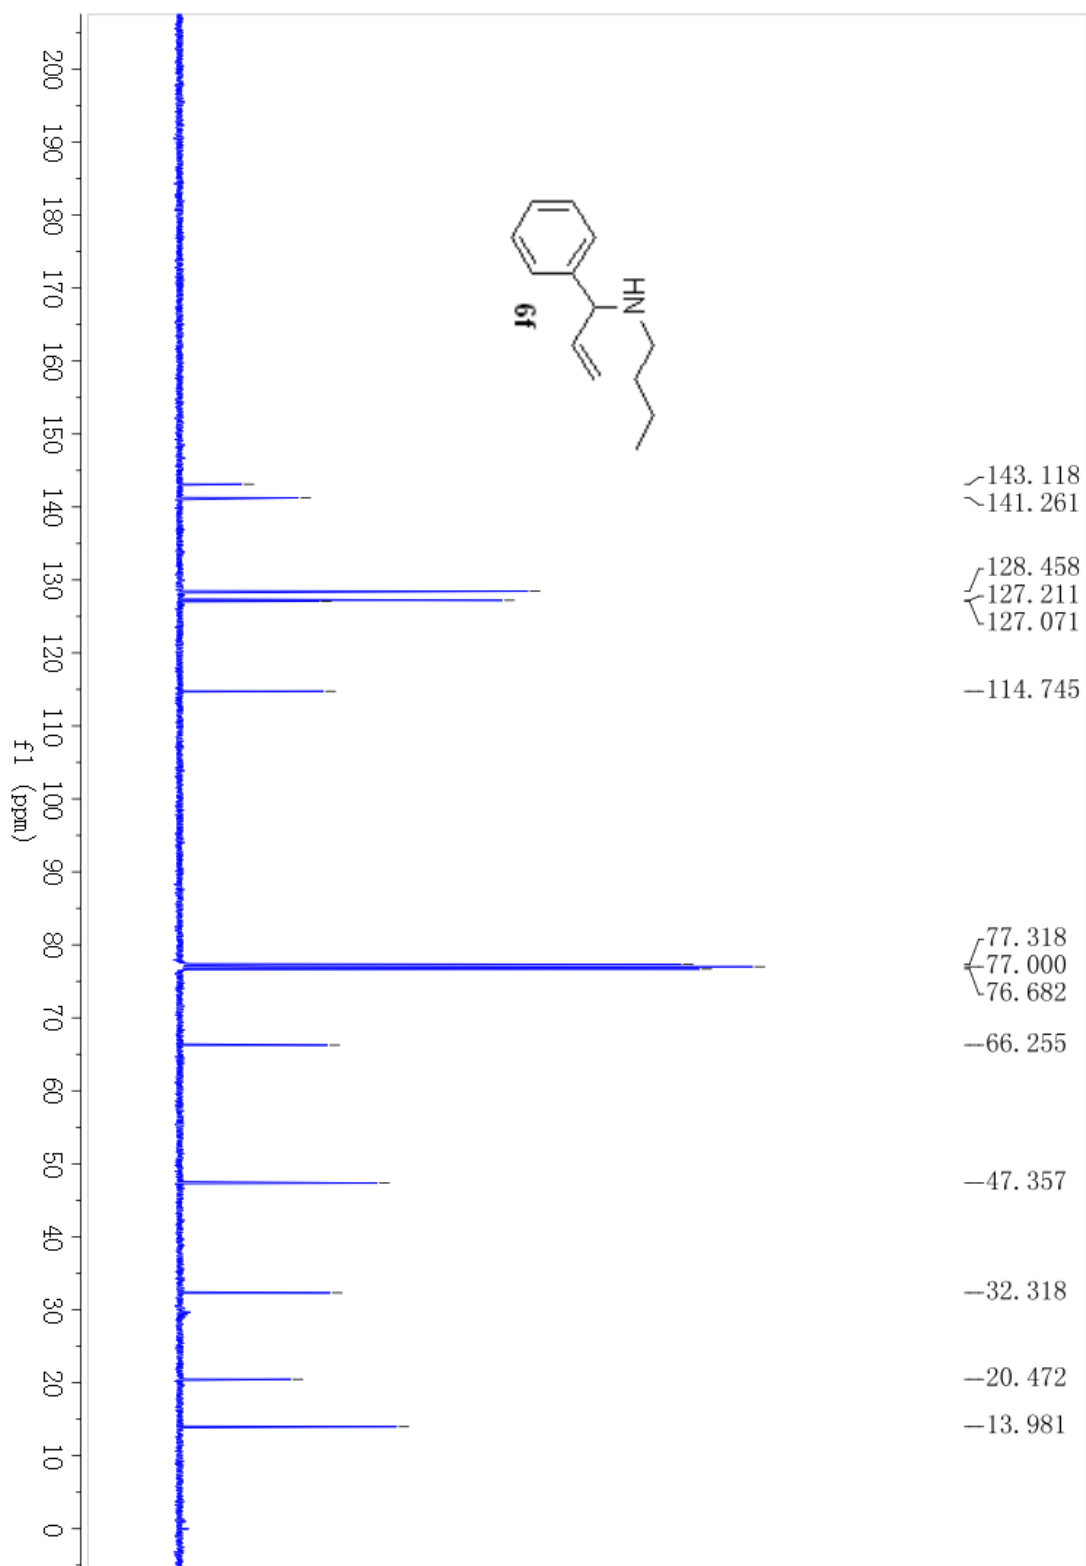

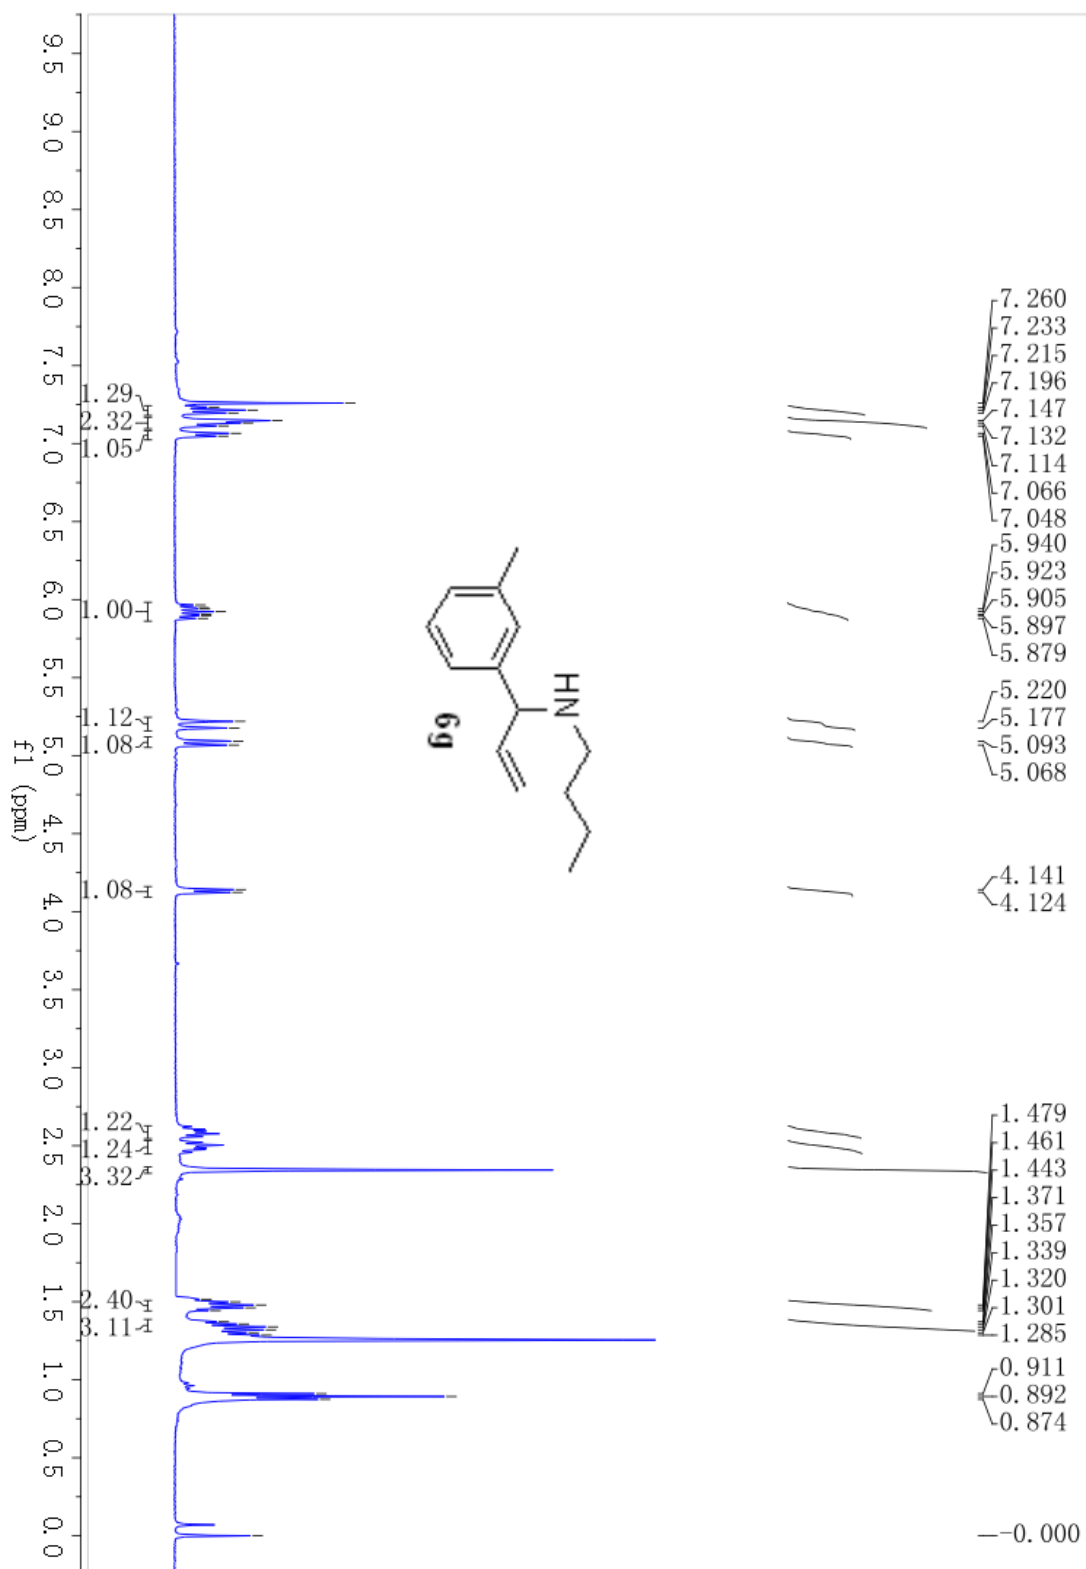

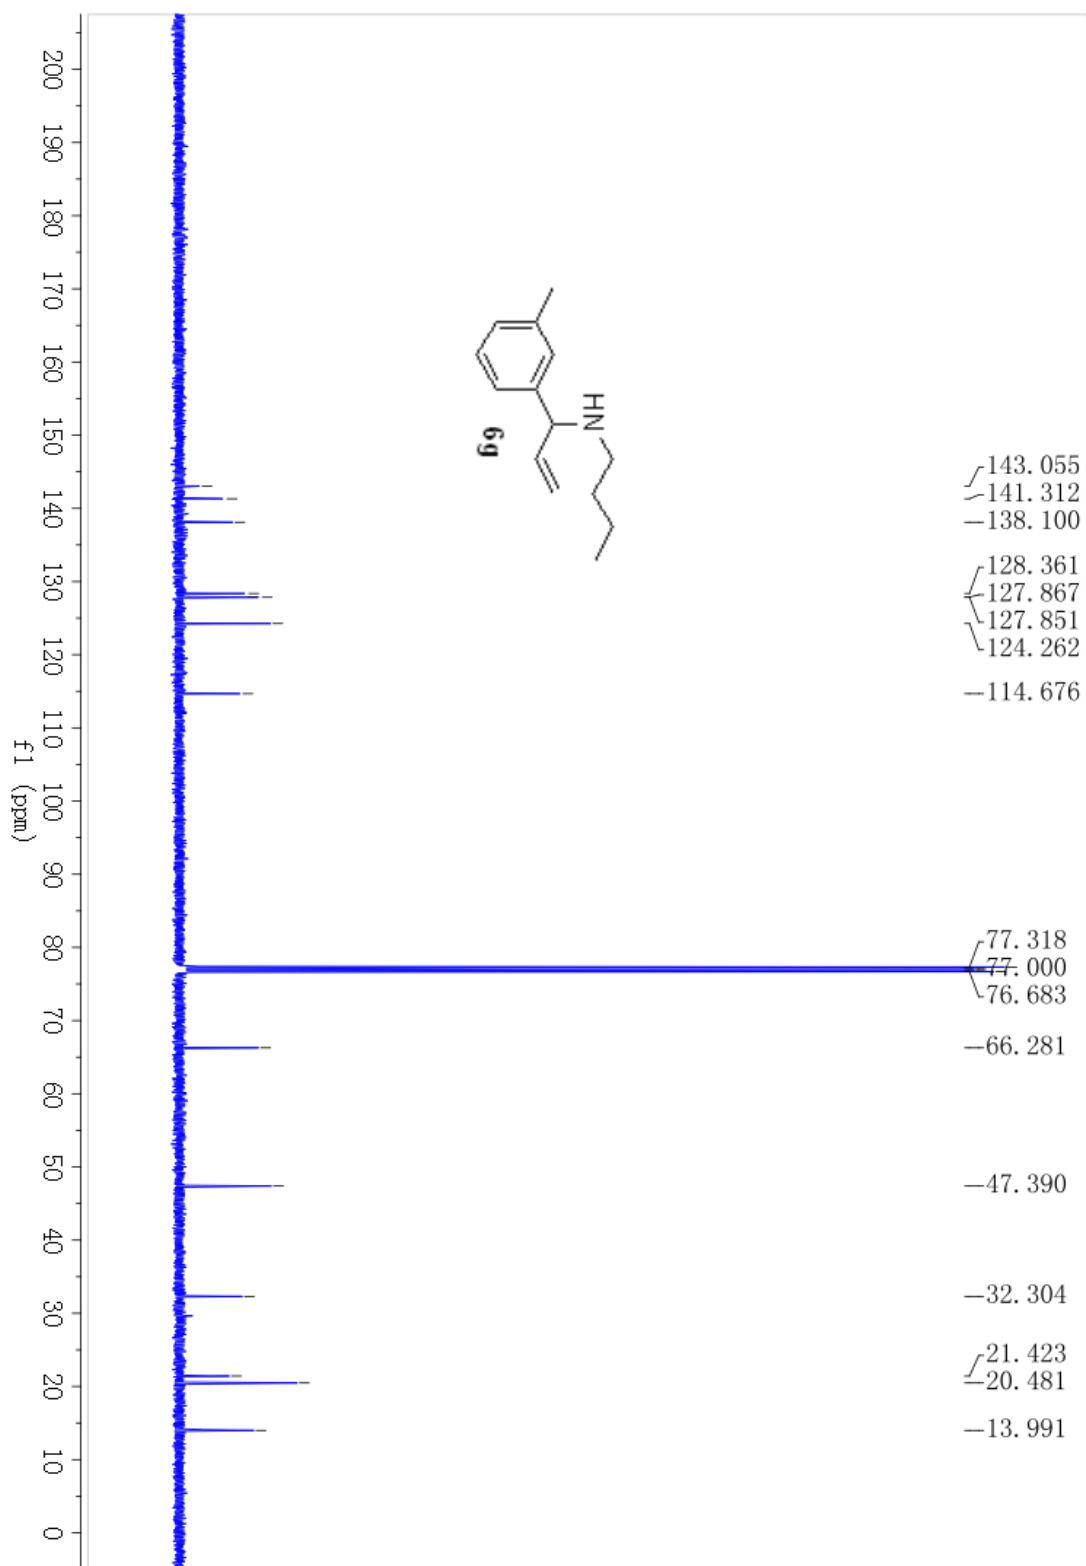



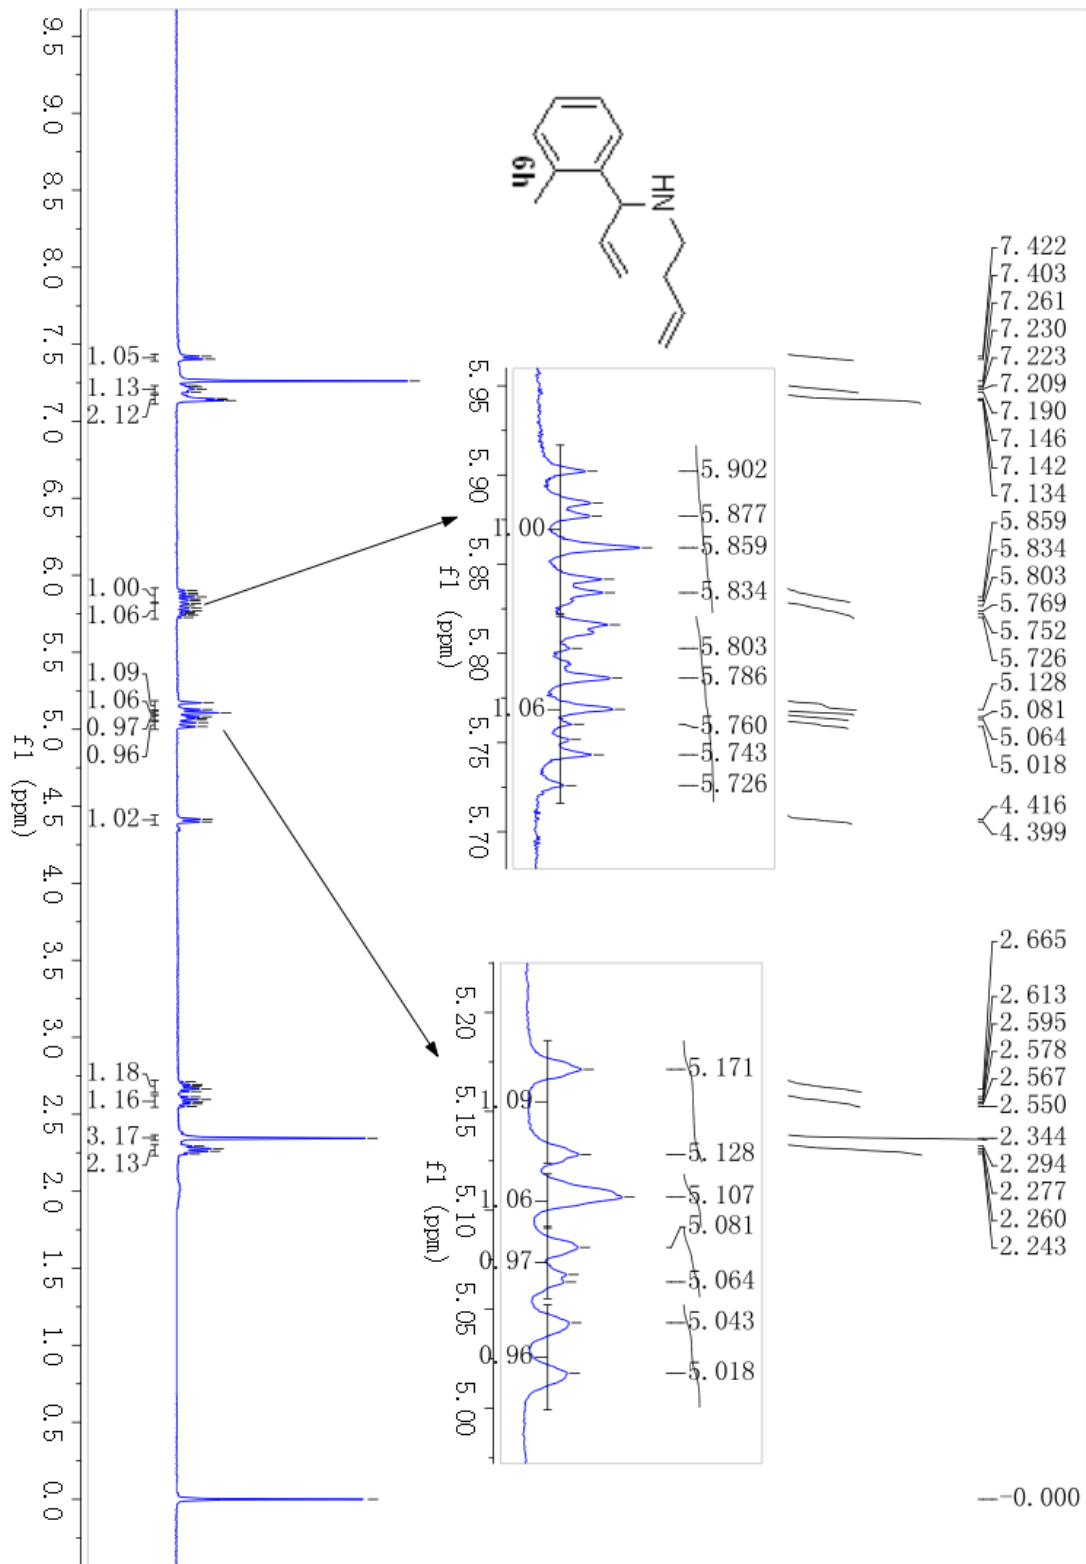

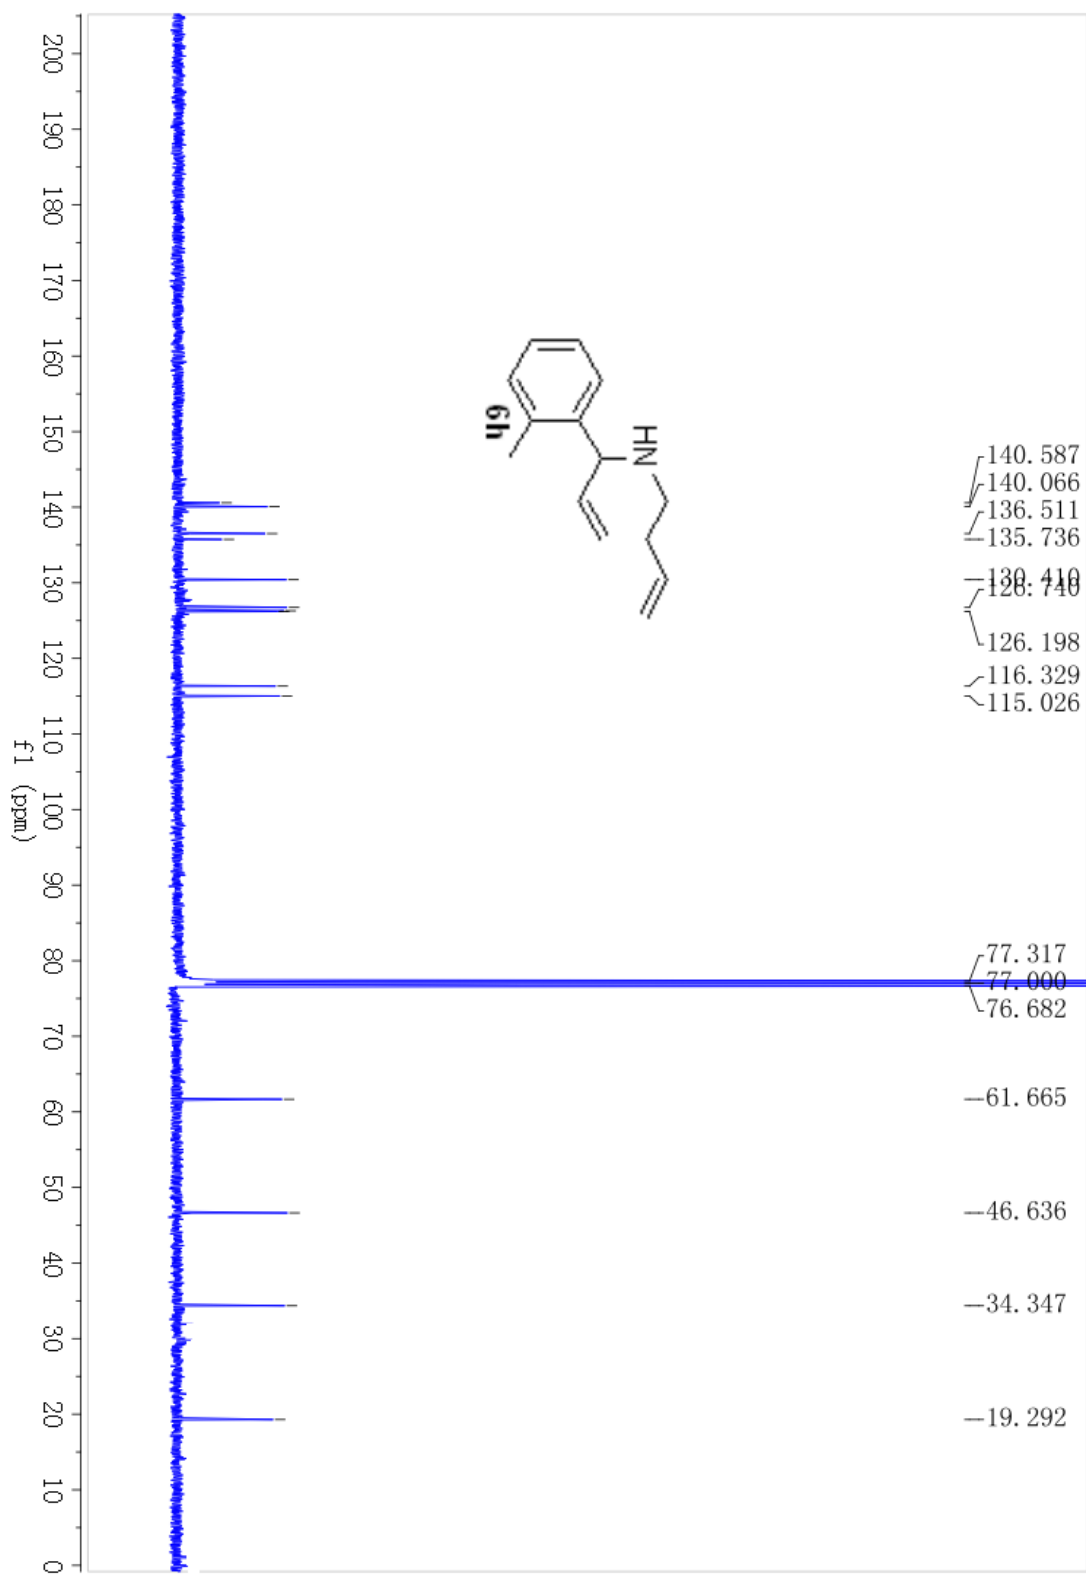

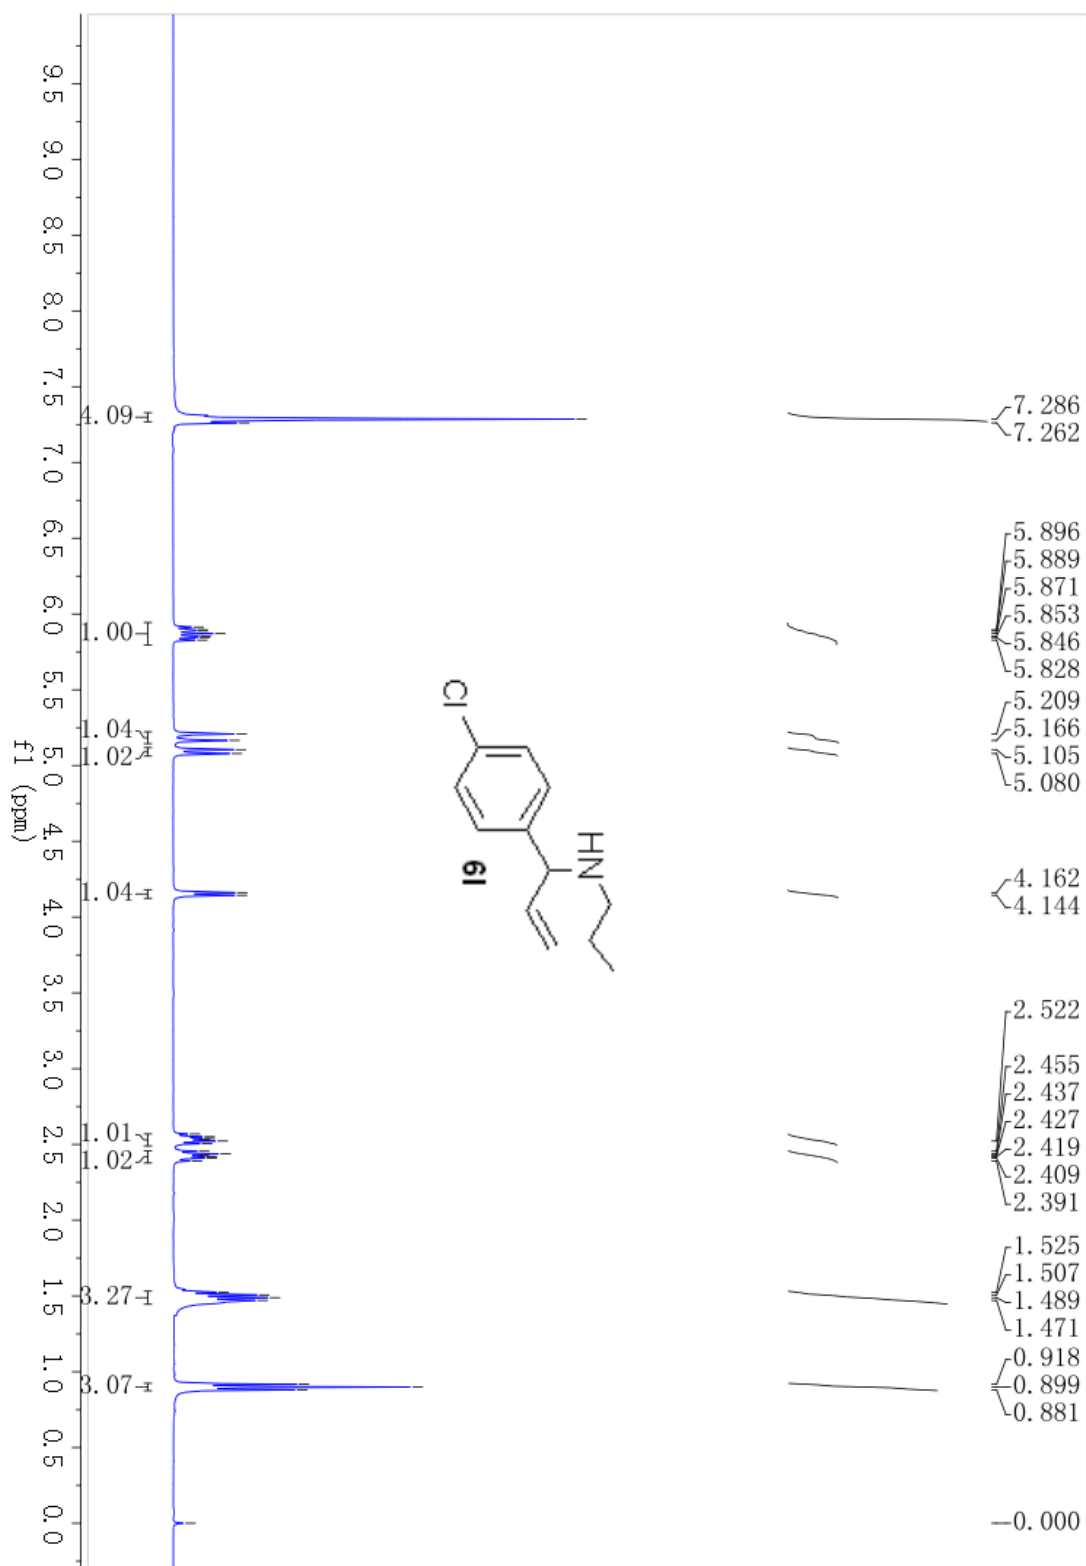

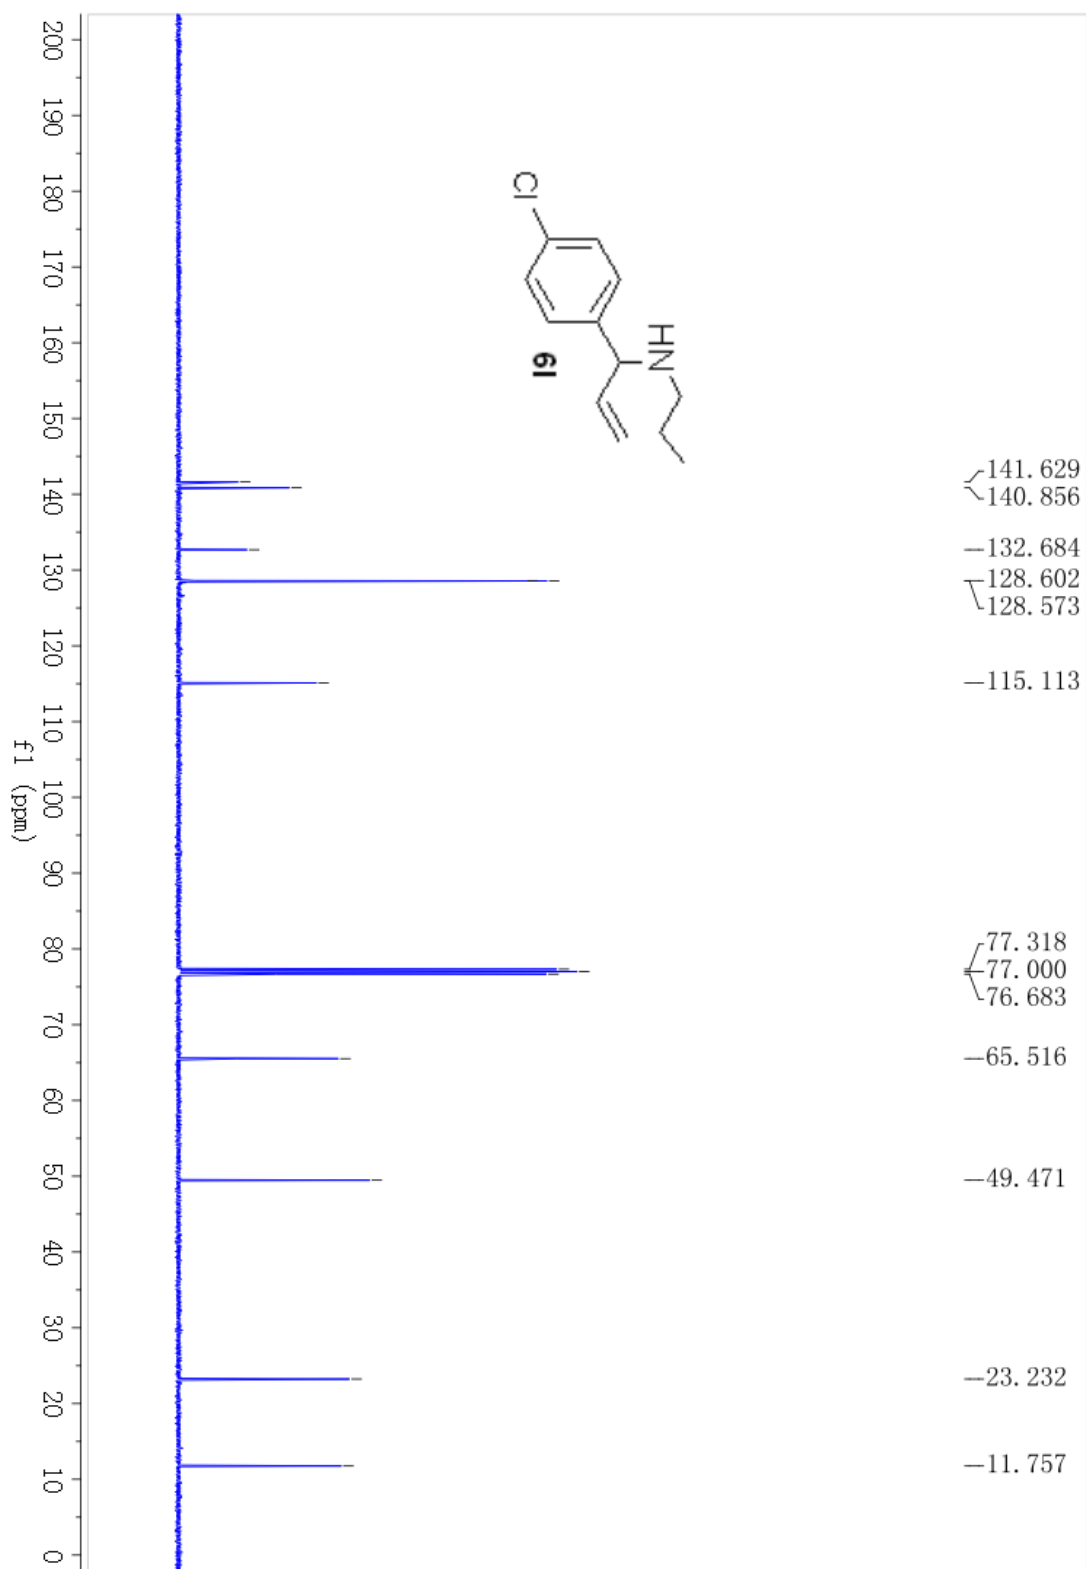

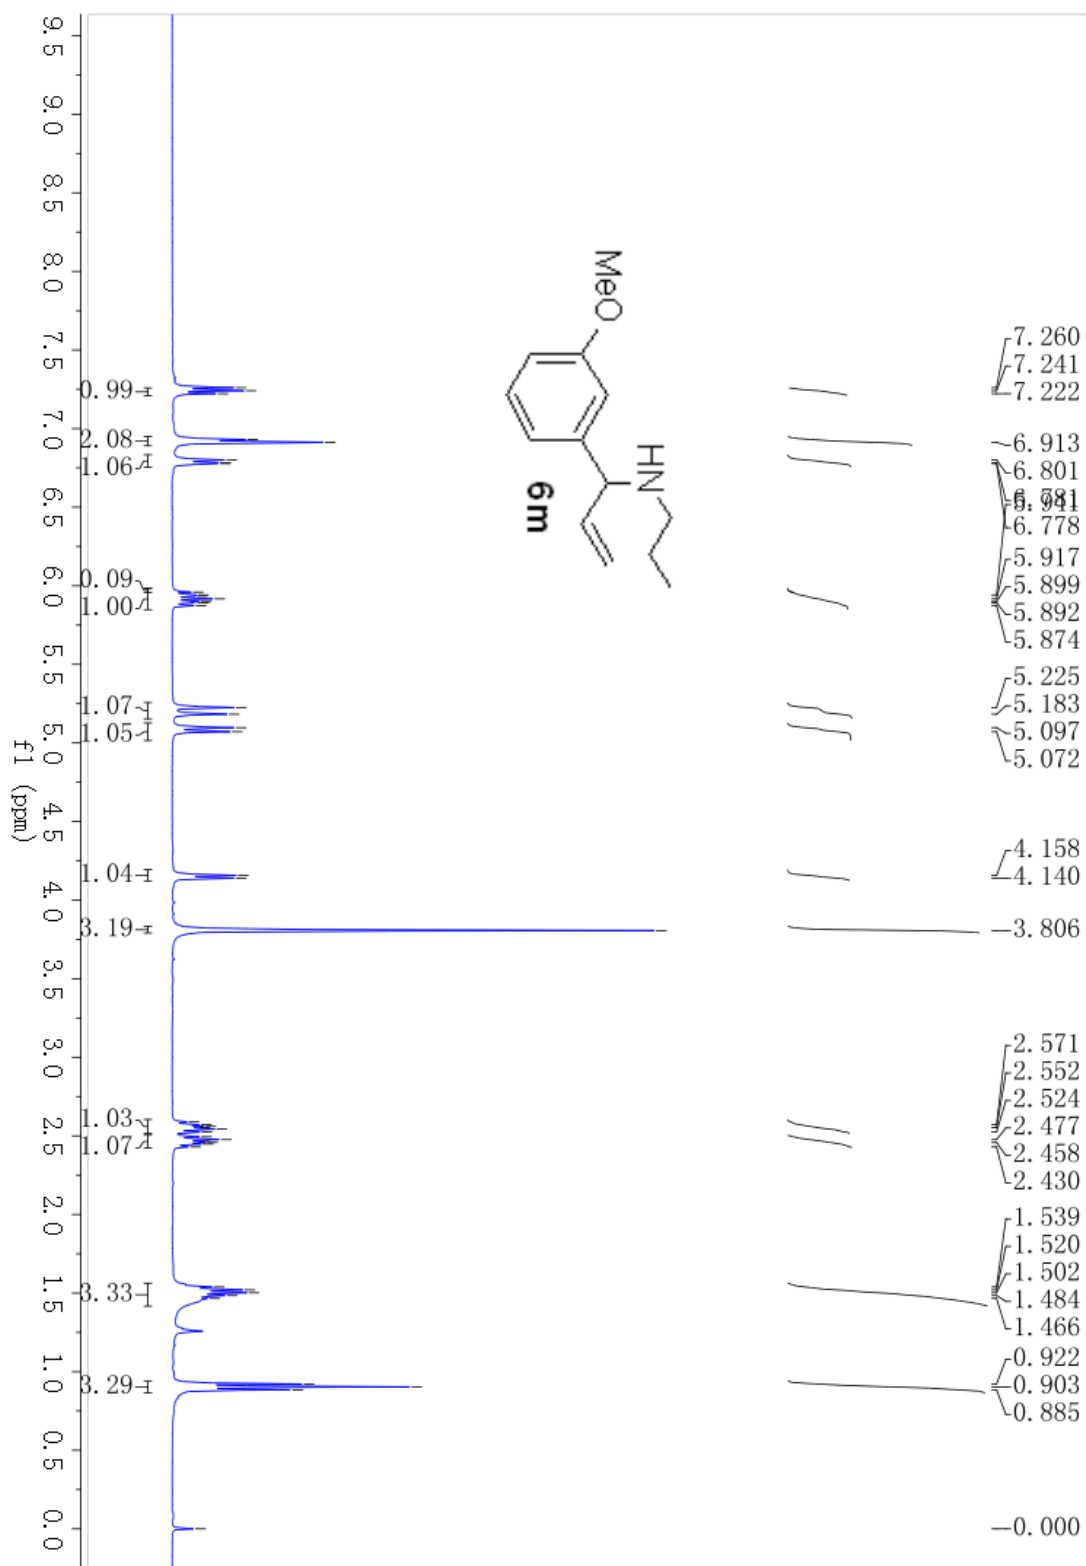

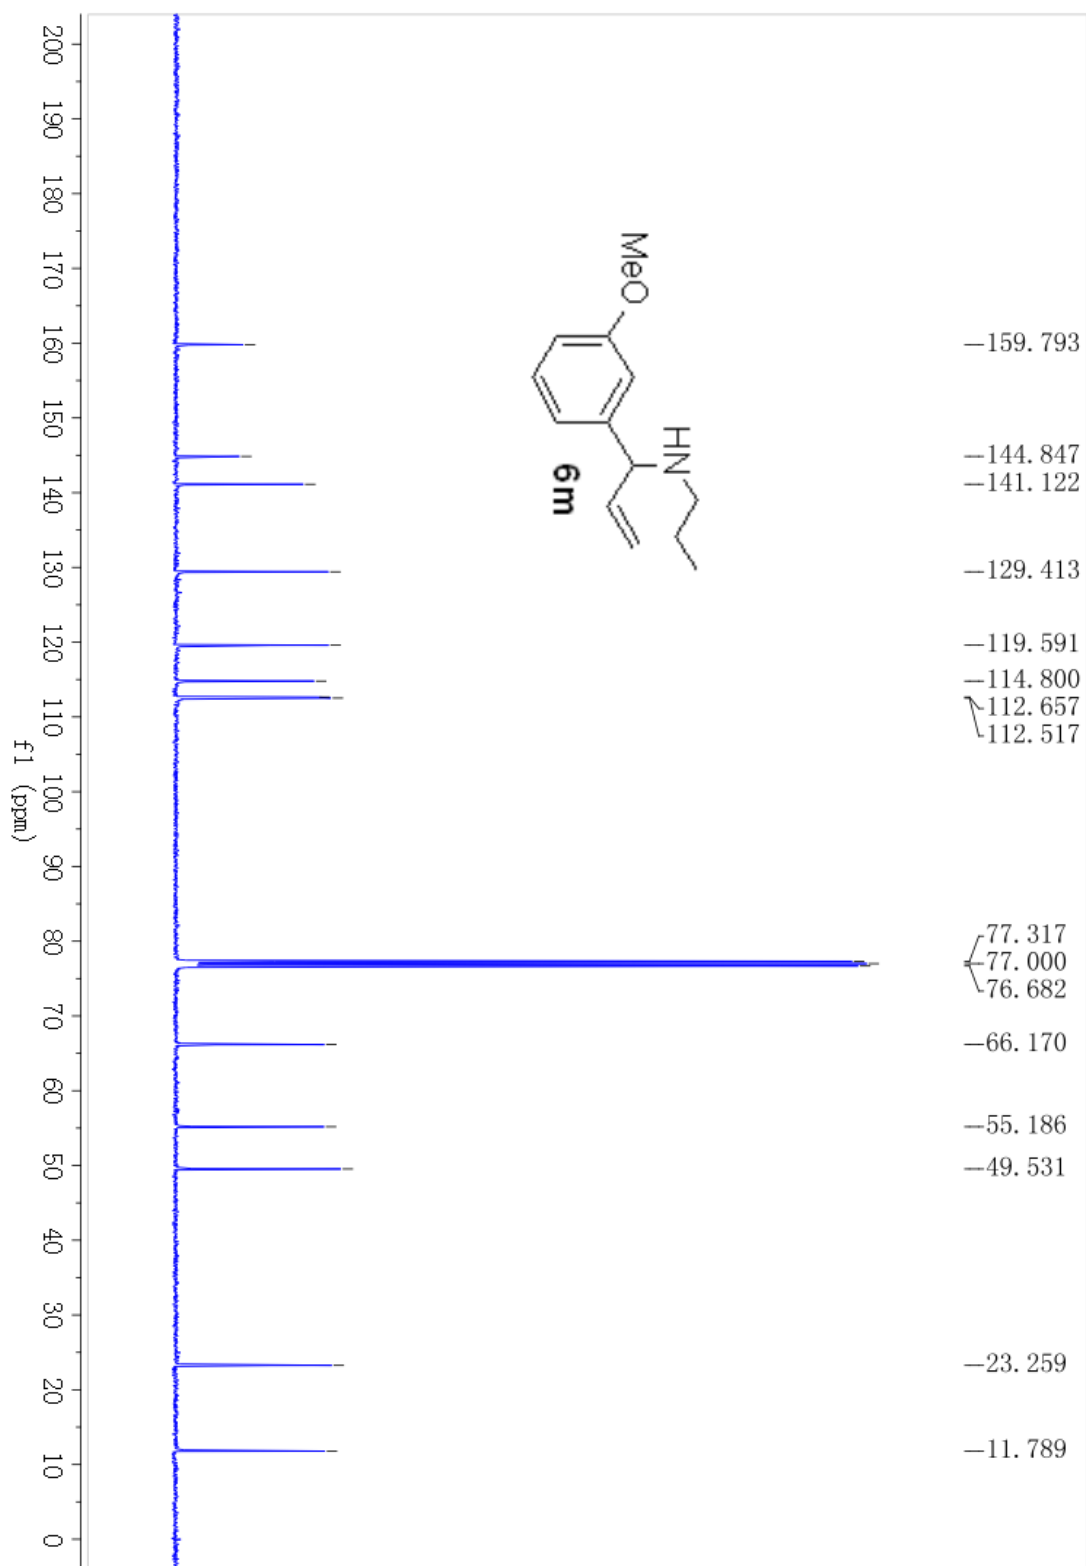

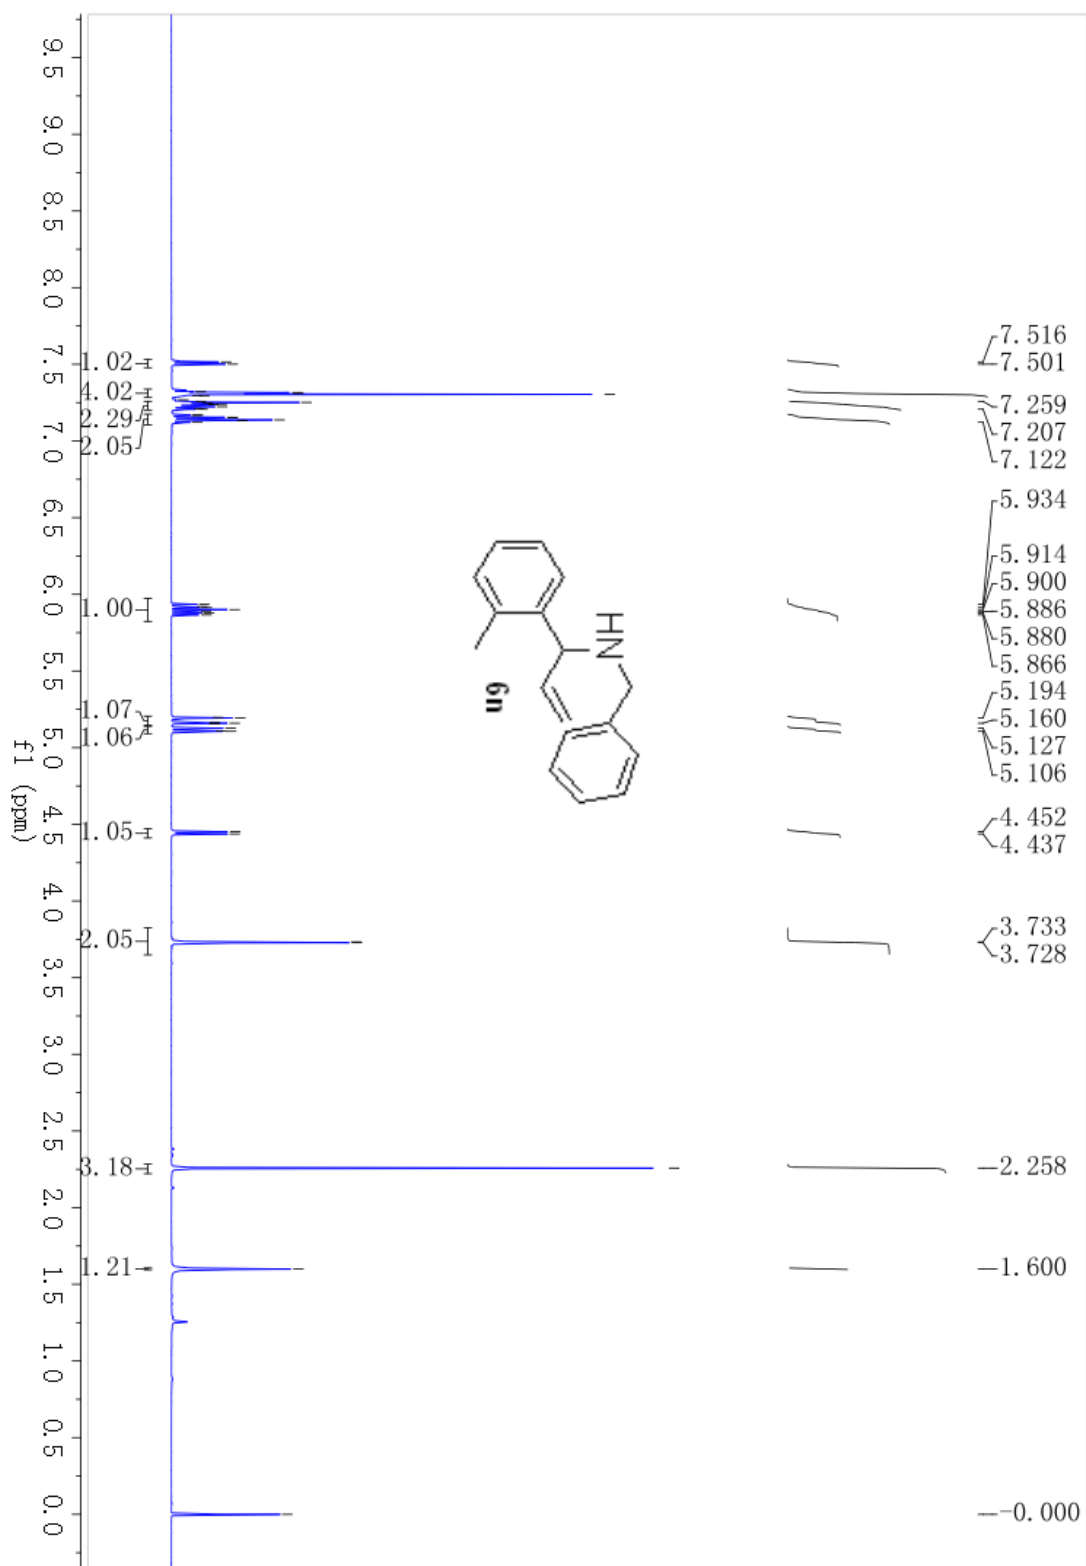

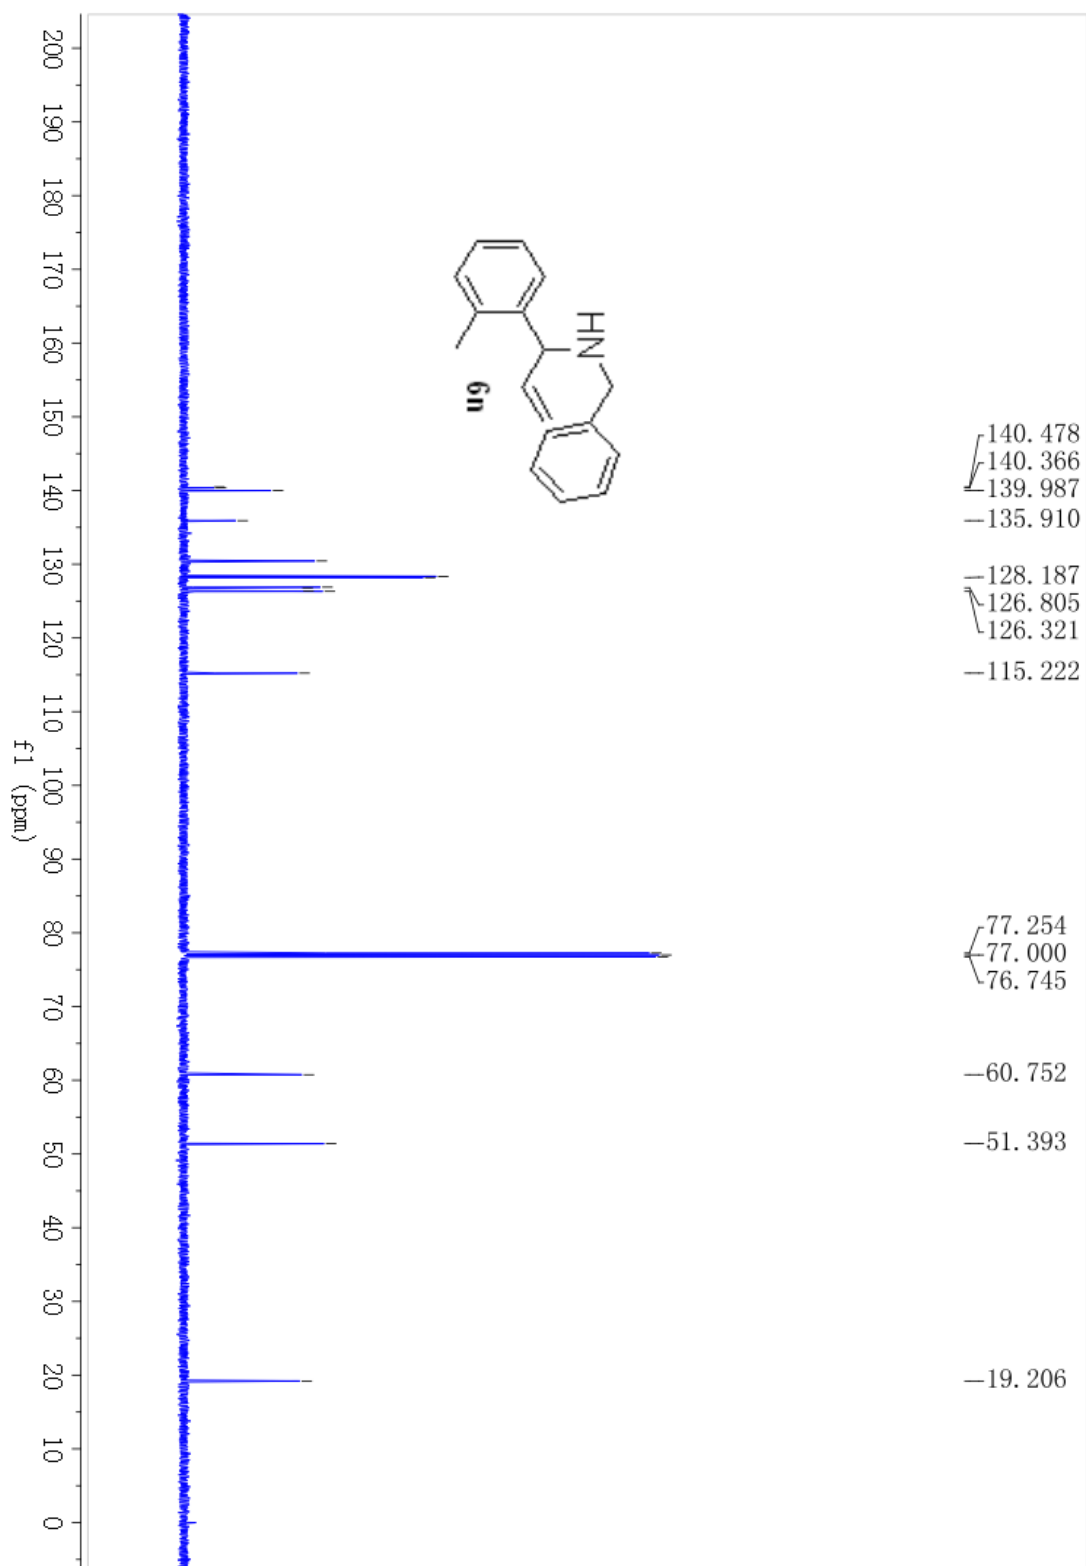



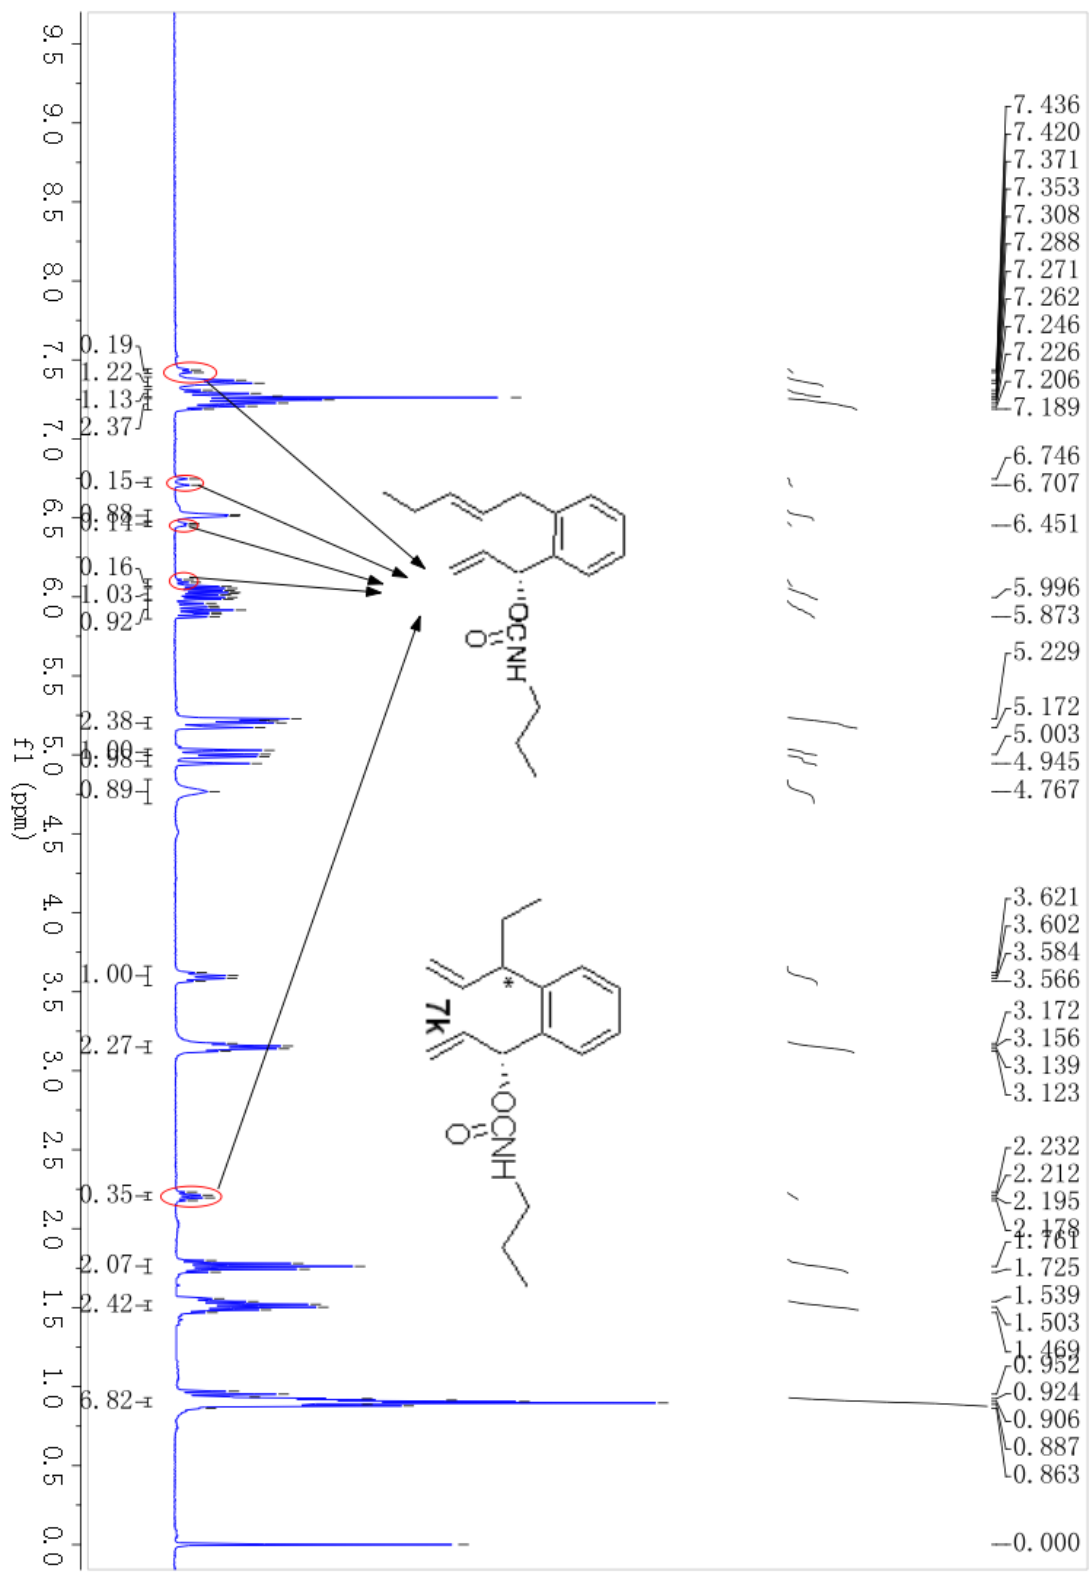

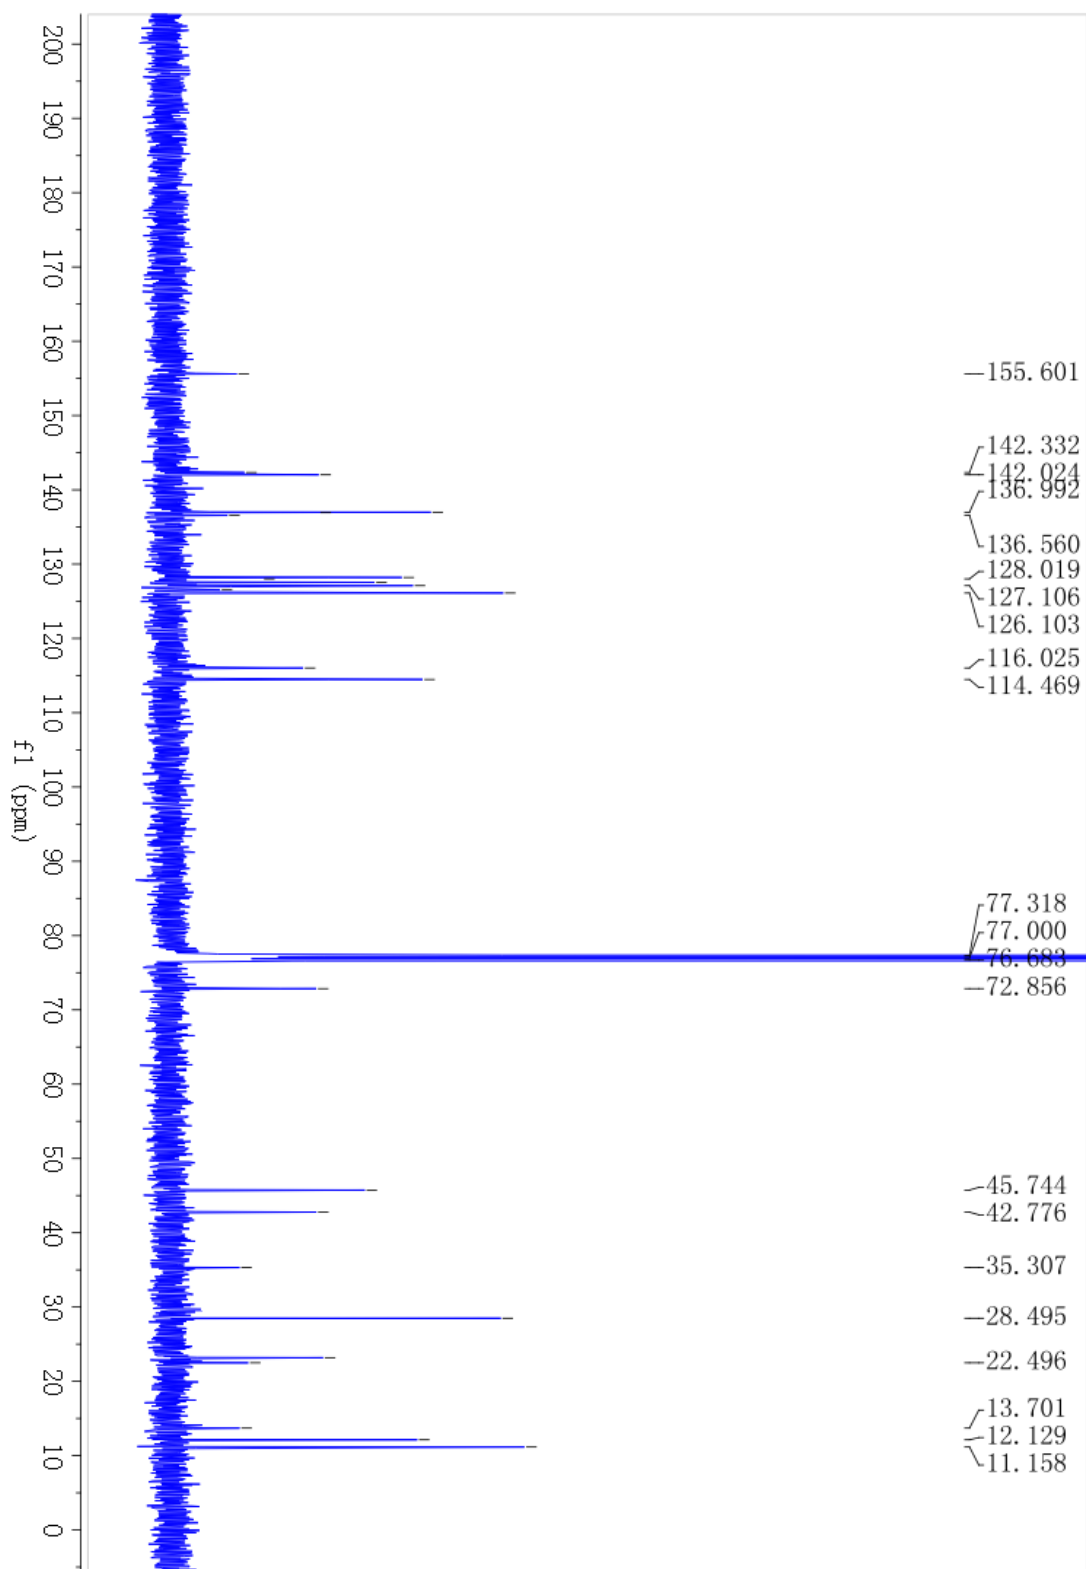

$^1\text{H}$  NMR spectrum for the controlling experiment 1:

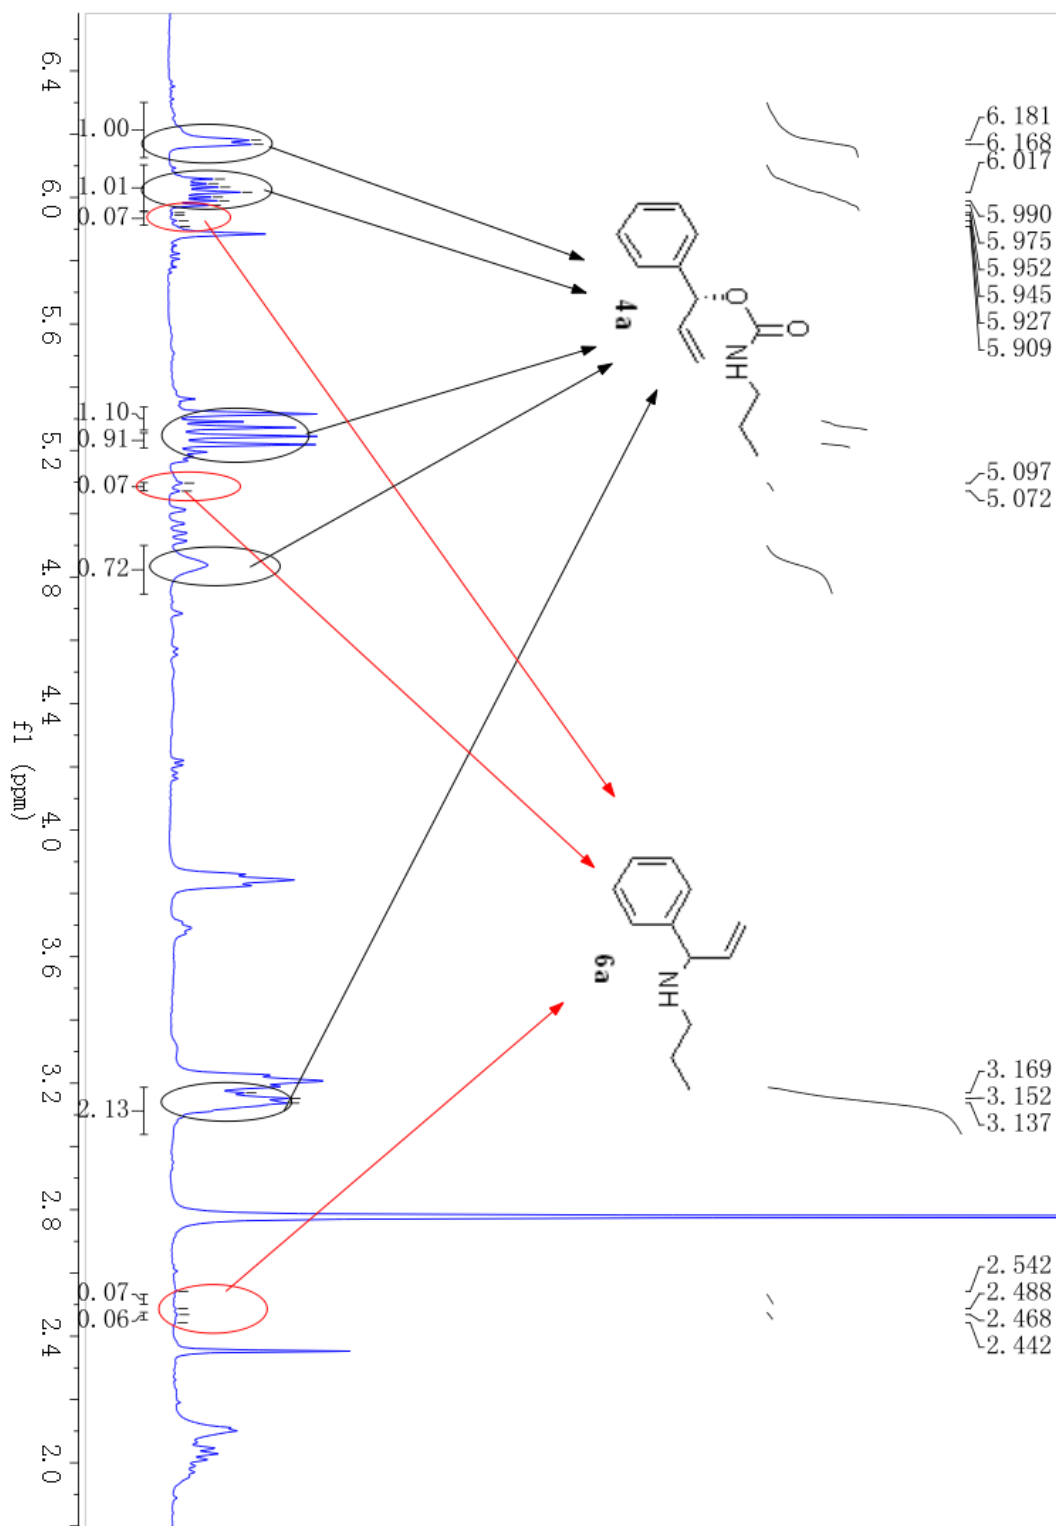

$^1\text{H}$  NMR spectrum for the controlling experiment 2:

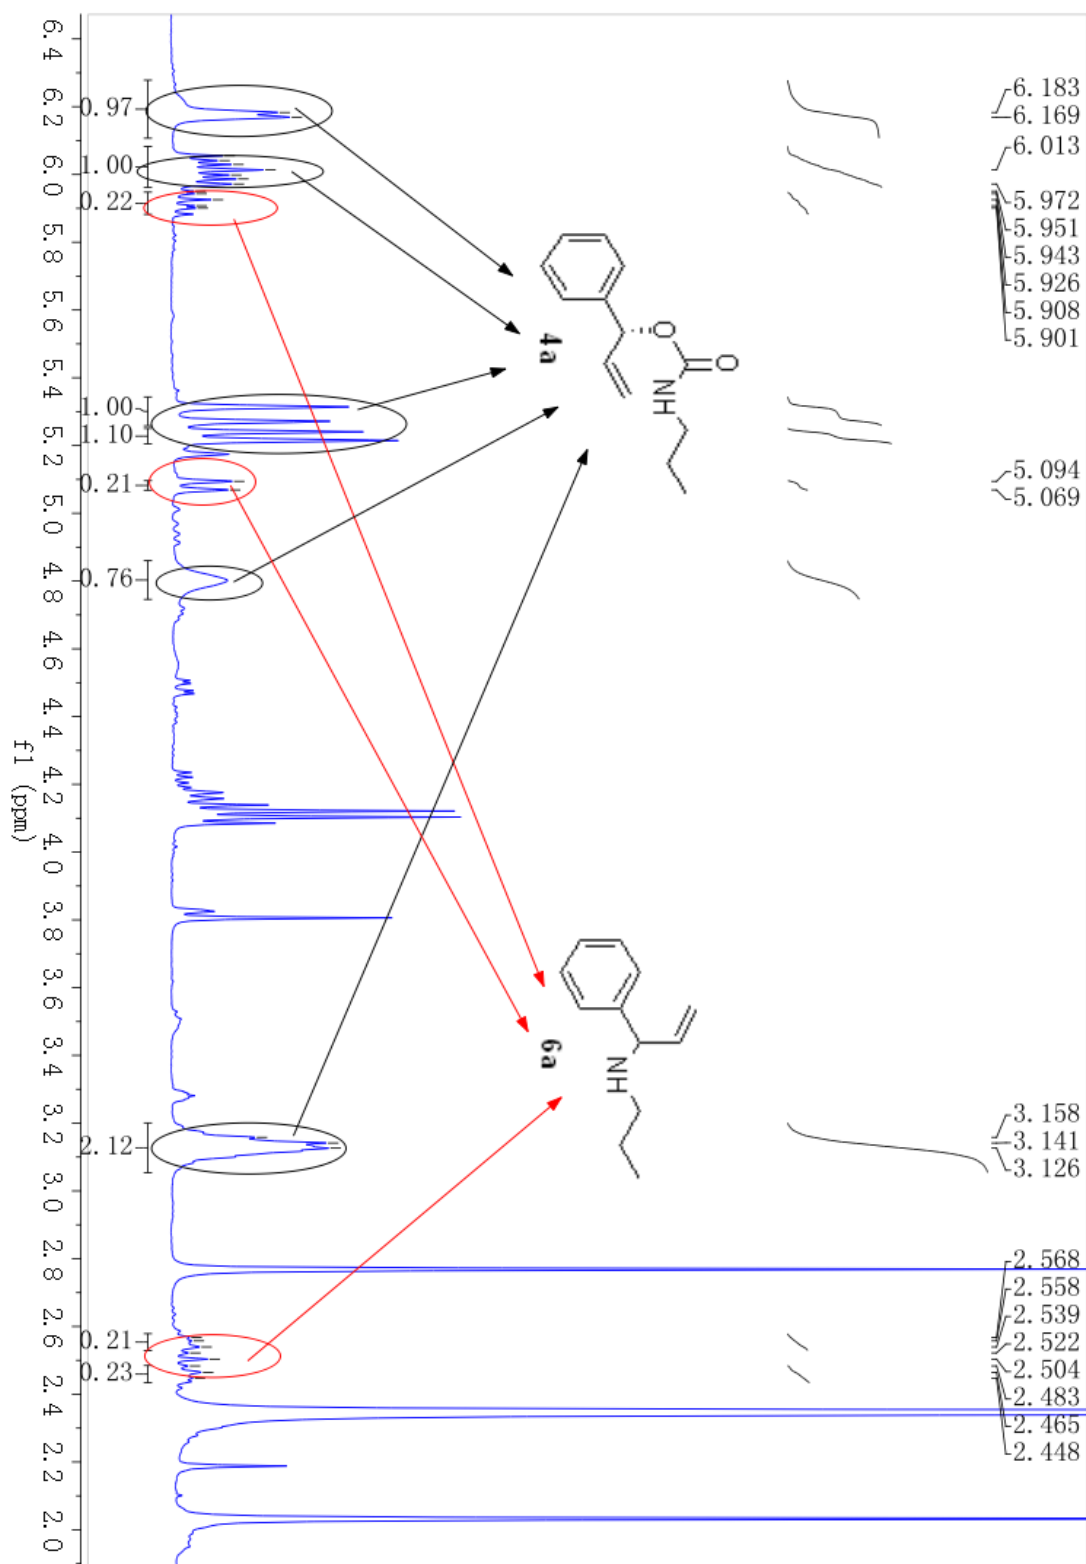

## HPLC Chromatograms of the Chiral Compounds

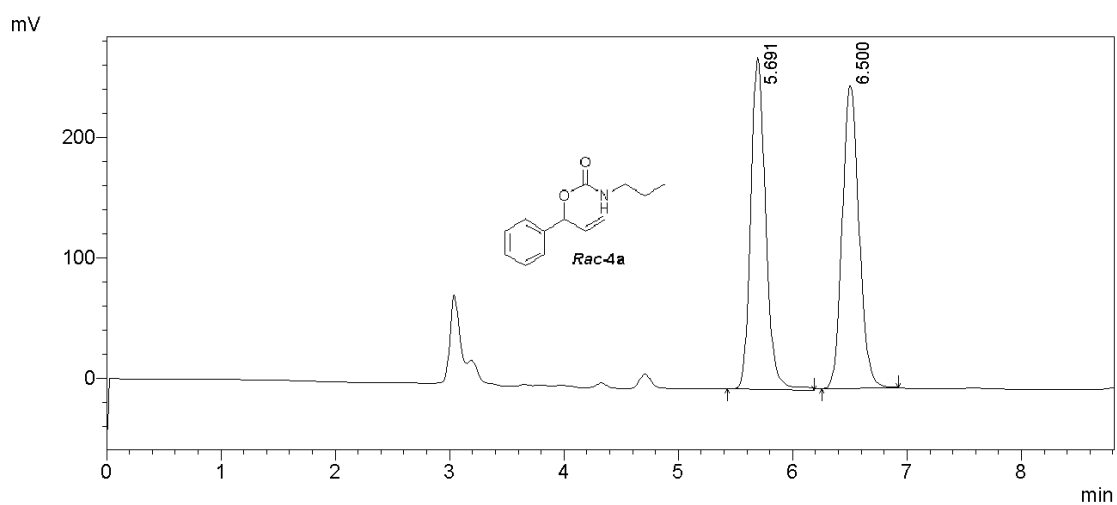

| Peak # | R. Time | Area    | Height | Area (%) | Height (%) |
|--------|---------|---------|--------|----------|------------|
| 1      | 5.691   | 2508378 | 275573 | 49.454   | 52.314     |
| 2      | 6.500   | 2563792 | 251190 | 50.546   | 47.686     |

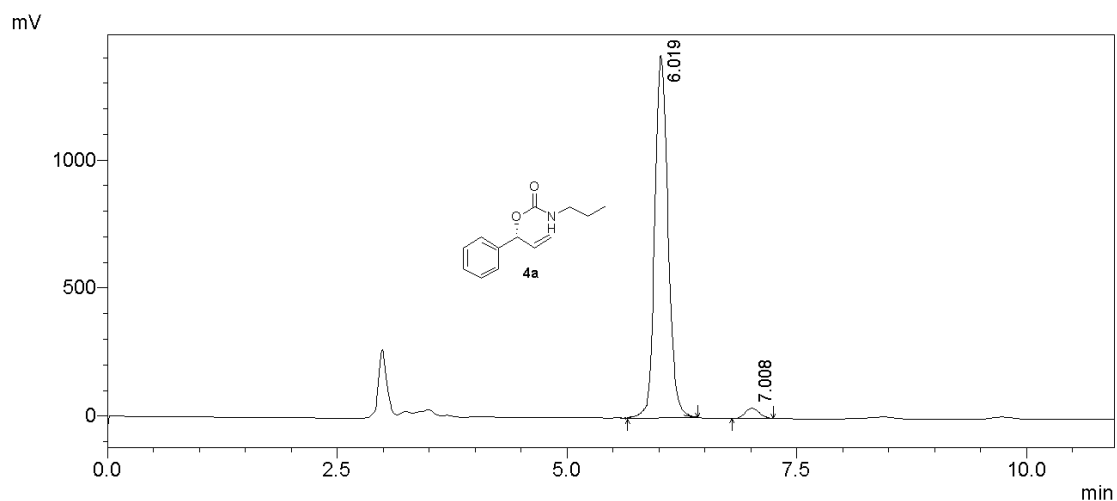

| Peak # | R. Time | Area     | Height  | Area (%) | Height (%) |
|--------|---------|----------|---------|----------|------------|
| 1      | 6.019   | 13478314 | 1390420 | 96.892   | 97.220     |
| 2      | 7.008   | 432301   | 39754   | 3.108    | 2.780      |

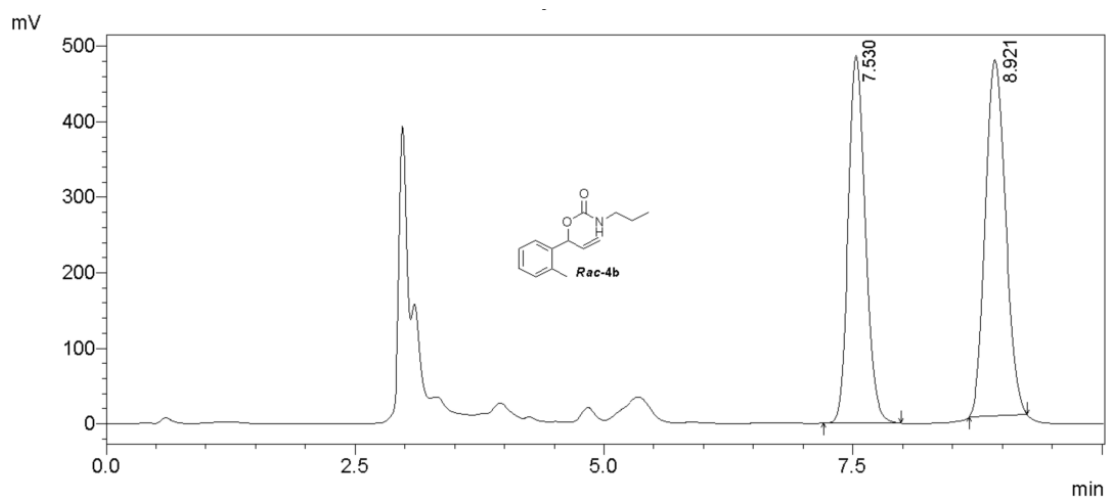

| Peak # | R. Time | Area    | Height | Area (%) | Height (%) |
|--------|---------|---------|--------|----------|------------|
| 1      | 7.530   | 5785818 | 486727 | 46.528   | 50.805     |
| 2      | 8.921   | 6649432 | 471310 | 53.472   | 49.195     |

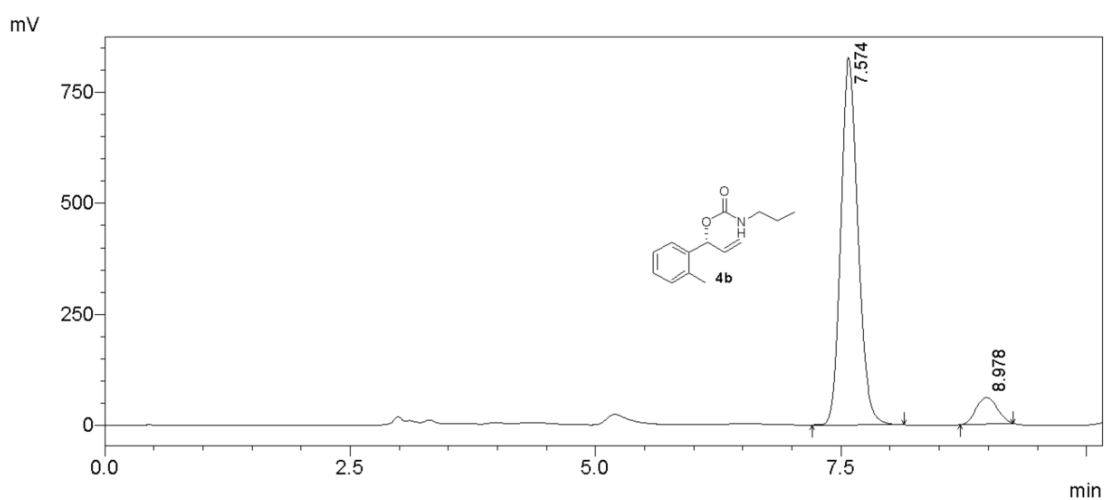

| Peak # | R. Time | Area    | Height | Area (%) | Height (%) |
|--------|---------|---------|--------|----------|------------|
| 1      | 7.574   | 1005691 | 826759 | 91.827   | 93.288     |
| 2      | 8.978   | 895004  | 59484  | 8.173    | 6.712      |

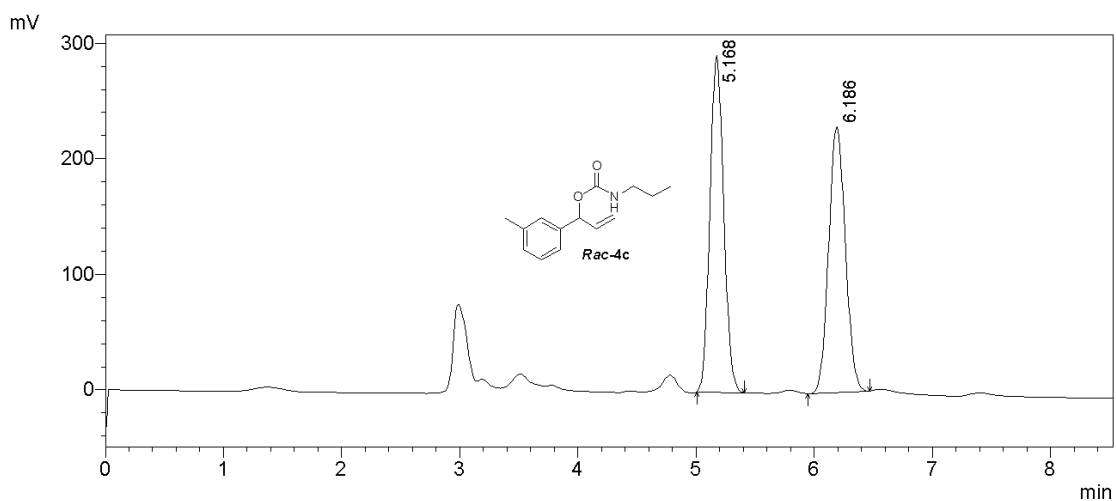

| Peak # | R. Time | Area    | Height | Area (%) | Height (%) |
|--------|---------|---------|--------|----------|------------|
| 1      | 5.168   | 2357983 | 290964 | 50.994   | 55.898     |
| 2      | 6.186   | 2266036 | 229561 | 49.006   | 44.102     |

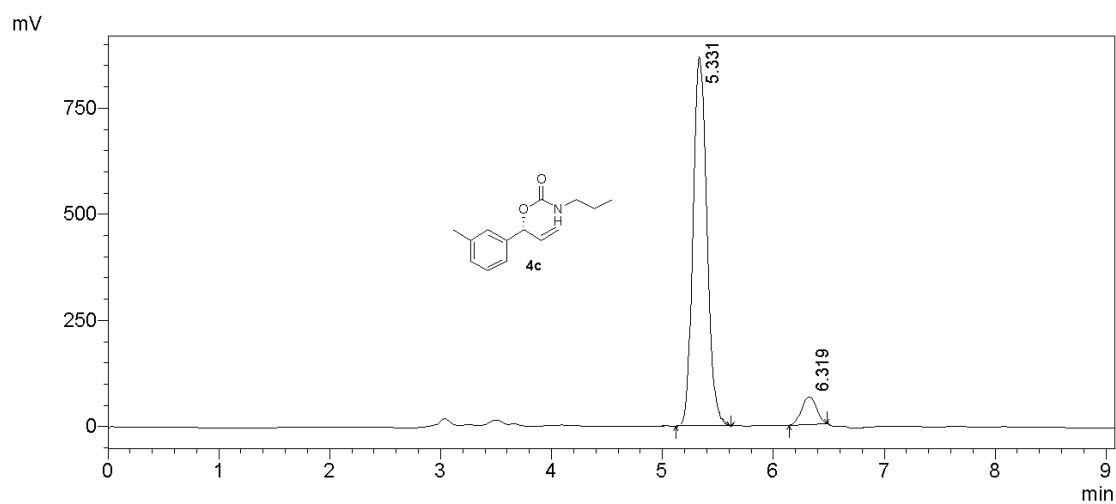

| Peak # | R. Time | Area    | Height | Area (%) | Height (%) |
|--------|---------|---------|--------|----------|------------|
| 1      | 5.331   | 7267803 | 855617 | 92.286   | 92.938     |
| 2      | 6.319   | 607528  | 65010  | 7.714    | 7.062      |

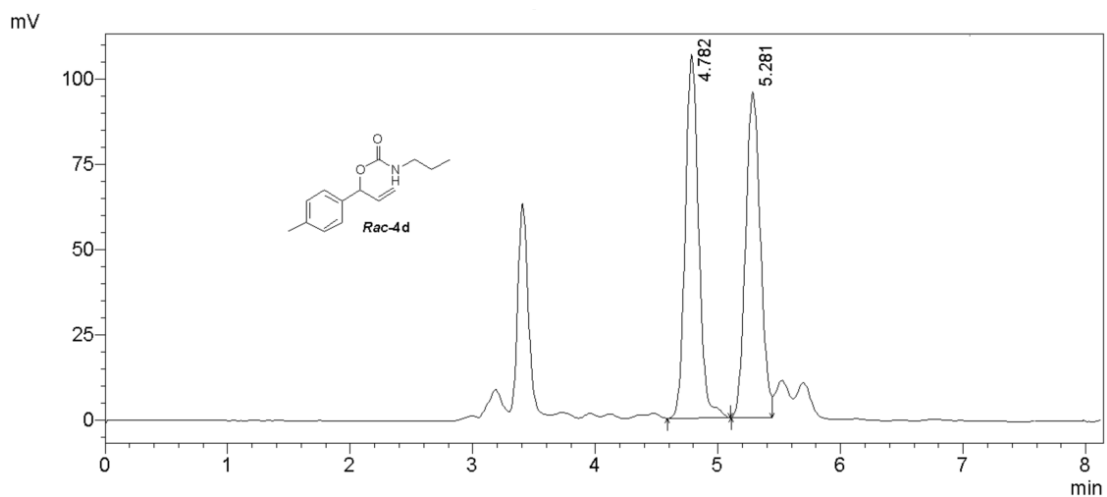

| Peak # | R. Time | Area   | Height | Area (%) | Height (%) |
|--------|---------|--------|--------|----------|------------|
| 1      | 4.782   | 808182 | 106559 | 50.221   | 52.713     |
| 2      | 5.281   | 801085 | 95592  | 49.779   | 47.287     |

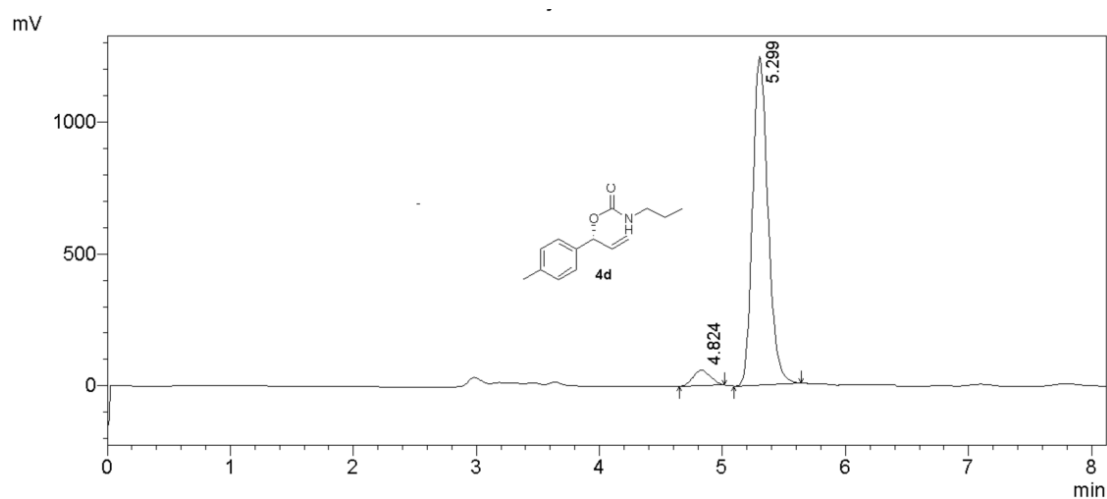

| Peak # | R. Time | Area     | Height  | Area (%) | Height (%) |
|--------|---------|----------|---------|----------|------------|
| 1      | 4.824   | 577432   | 58379   | 5.058    | 4.481      |
| 2      | 5.299   | 10839596 | 1244296 | 94.942   | 95.519     |



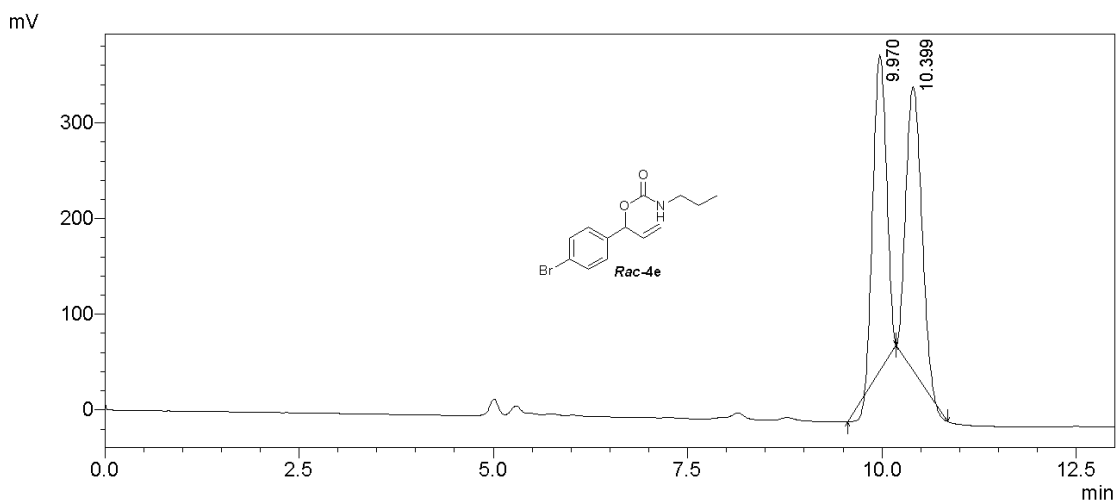

| Peak # | R. Time | Area    | Height | Area (%) | Height (%) |
|--------|---------|---------|--------|----------|------------|
| 1      | 9.970   | 3991933 | 330557 | 48.310   | 52.724     |
| 2      | 10.399  | 4153549 | 296403 | 51.690   | 47.276     |

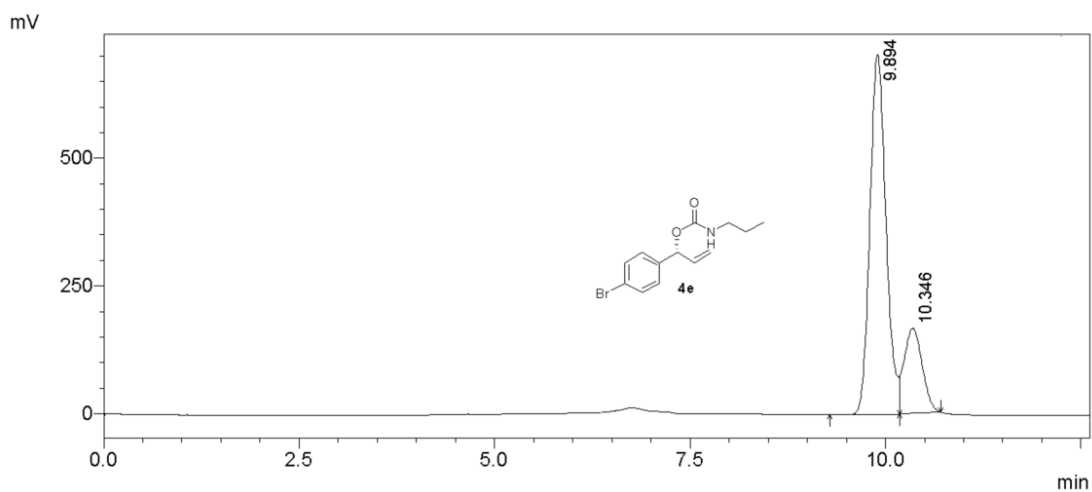

| Peak # | R. Time | Area     | Height | Area (%) | Height (%) |
|--------|---------|----------|--------|----------|------------|
| 1      | 9.894   | 10124812 | 704348 | 79.407   | 80.926     |
| 2      | 10.346  | 2625759  | 166017 | 20.593   | 19.074     |

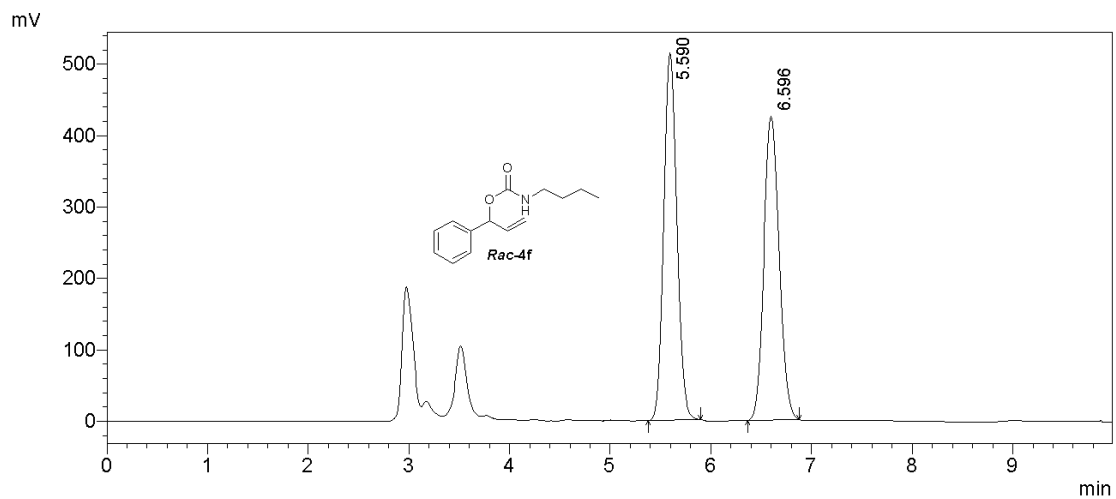

| Peak # | R. Time | Area    | Height | Area (%) | Height (%) |
|--------|---------|---------|--------|----------|------------|
| 1      | 5.590   | 4586158 | 514145 | 50.425   | 54.703     |
| 2      | 6.596   | 4508853 | 425748 | 49.575   | 45.297     |

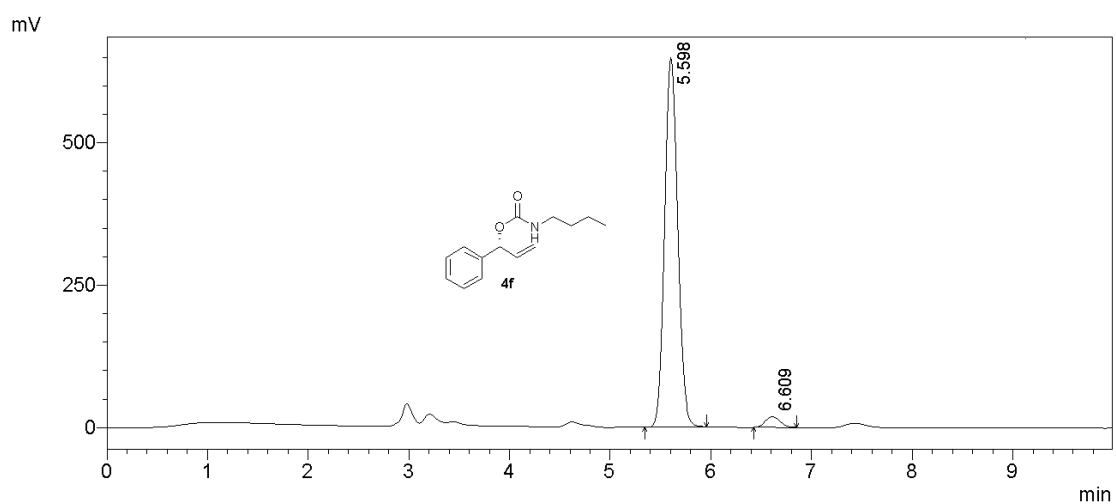

| Peak # | R. Time | Area    | Height | Area (%) | Height (%) |
|--------|---------|---------|--------|----------|------------|
| 1      | 5.598   | 5767939 | 647633 | 96.768   | 97.169     |
| 2      | 6.609   | 192642  | 18871  | 3.232    | 2.831      |

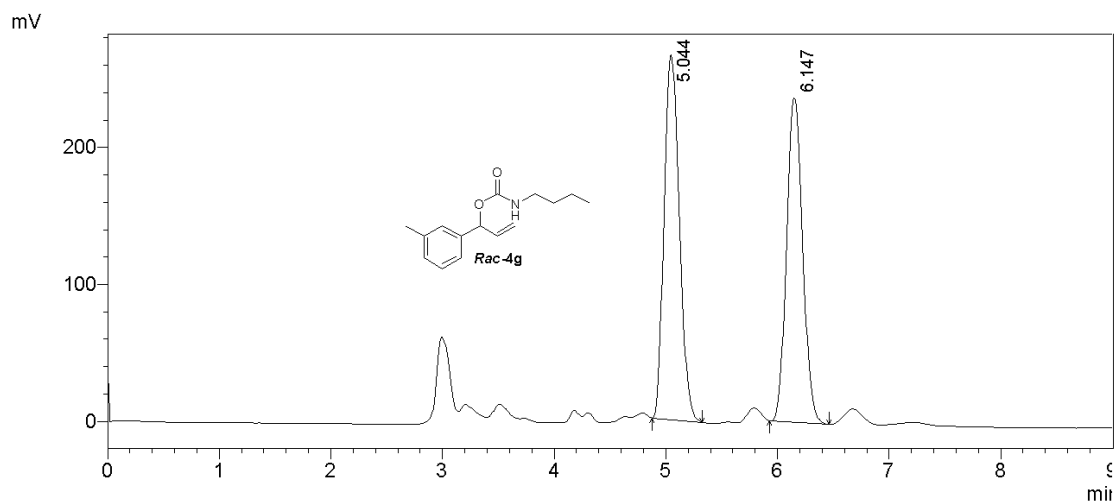

| Peak # | R. Time | Area    | Height | Area (%) | Height (%) |
|--------|---------|---------|--------|----------|------------|
| 1      | 5.044   | 2534034 | 266060 | 51.623   | 52.911     |
| 2      | 6.147   | 2374671 | 236782 | 48.377   | 47.089     |

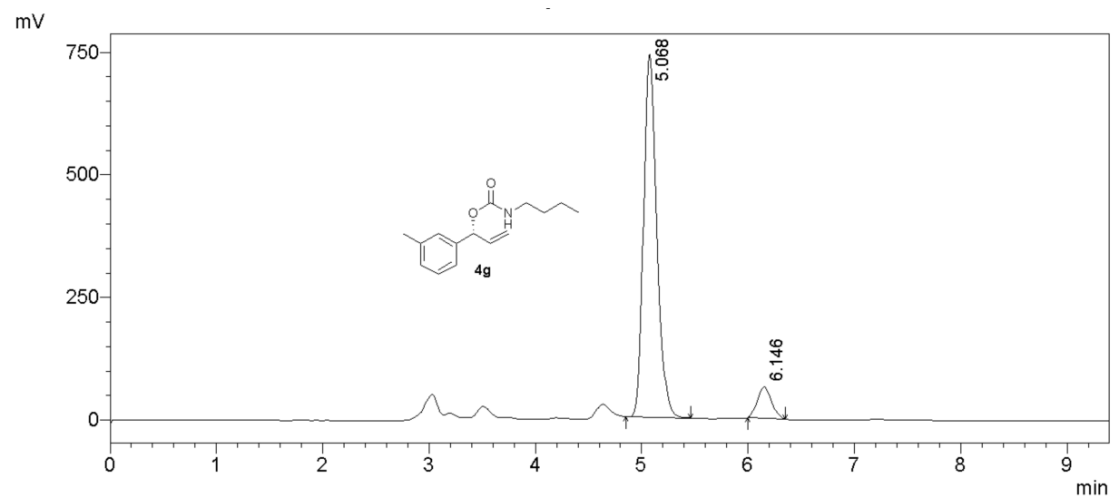

| Peak # | R. Time | Area    | Height | Area (%) | Height (%) |
|--------|---------|---------|--------|----------|------------|
| 1      | 5.068   | 6431588 | 739037 | 91.520   | 92.068     |
| 2      | 6.146   | 595904  | 63674  | 8.480    | 7.932      |

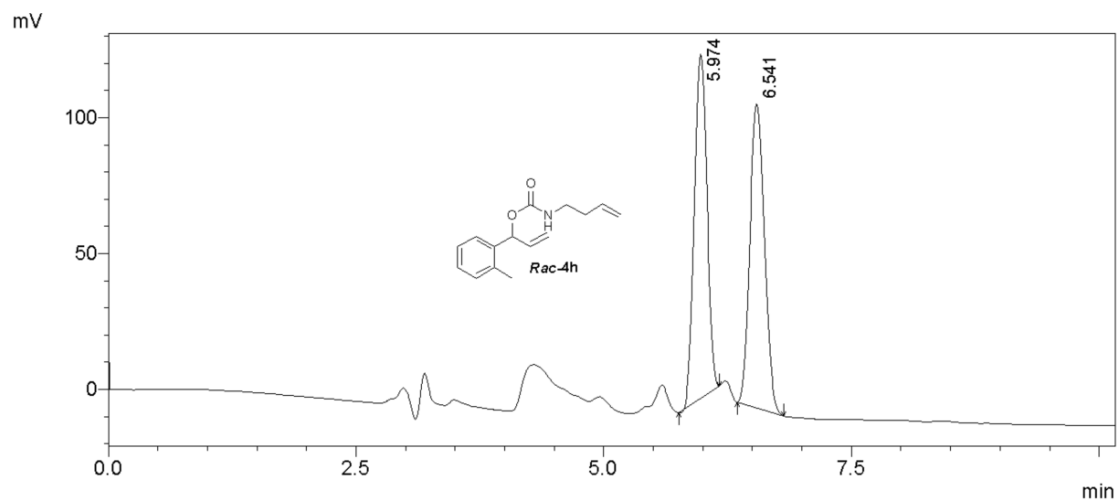

| Peak # | R. Time | Area    | Height | Area (%) | Height (%) |
|--------|---------|---------|--------|----------|------------|
| 1      | 5.974   | 1120307 | 126652 | 49.375   | 53.095     |
| 2      | 6.541   | 1148660 | 111885 | 50.625   | 46.905     |

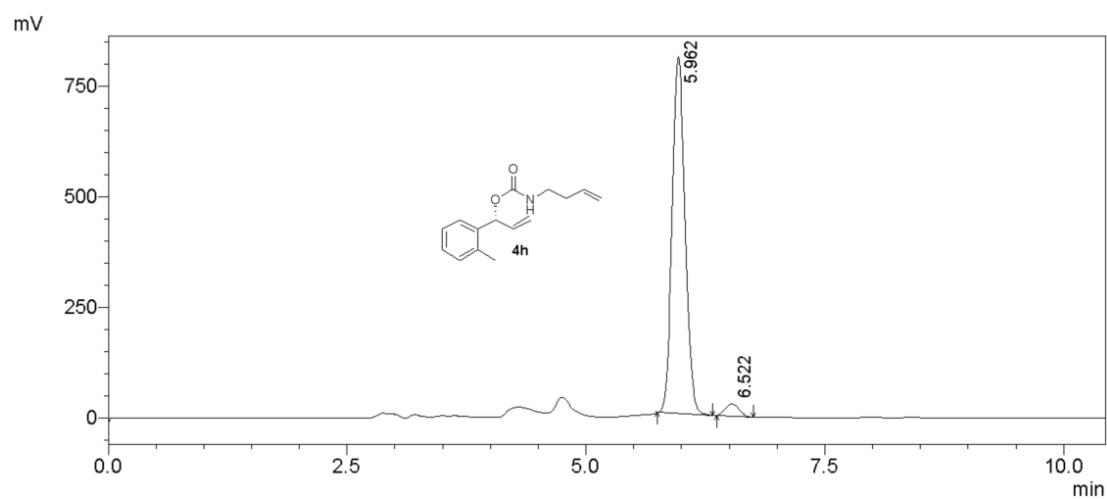

| Peak # | R. Time | Area    | Height | Area (%) | Height (%) |
|--------|---------|---------|--------|----------|------------|
| 1      | 5.962   | 7592272 | 806749 | 96.440   | 96.627     |
| 2      | 6.522   | 280243  | 28162  | 3.560    | 3.373      |

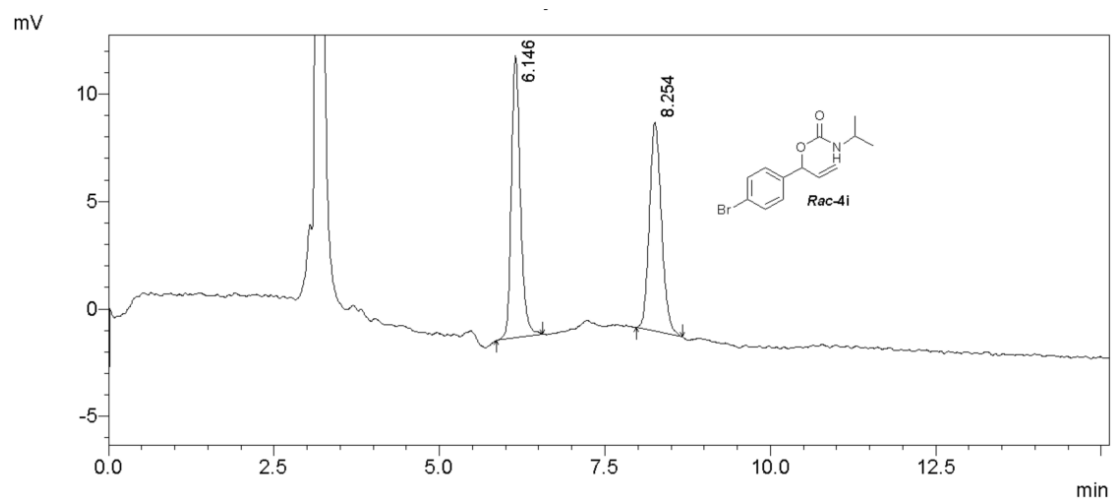

| Peak # | R. Time | Area   | Height | Area (%) | Height (%) |
|--------|---------|--------|--------|----------|------------|
| 1      | 6.146   | 119560 | 12990  | 49.526   | 57.319     |
| 2      | 8.254   | 121848 | 9673   | 50.474   | 42.681     |

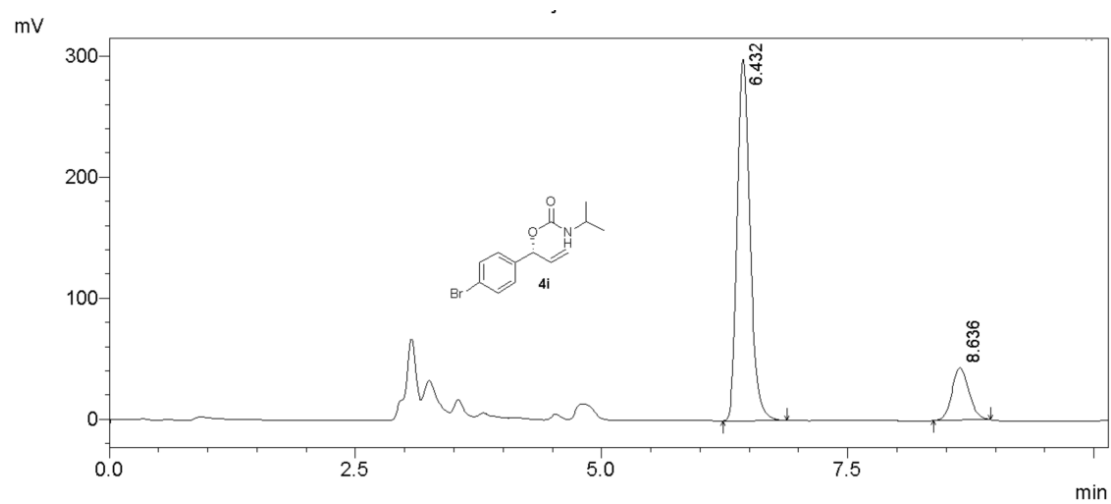

| Peak # | R. Time | Area    | Height | Area (%) | Height (%) |
|--------|---------|---------|--------|----------|------------|
| 1      | 6.432   | 2686867 | 298599 | 83.789   | 57.3374    |
| 2      | 8.636   | 519839  | 43295  | 16.211   | 12.663     |

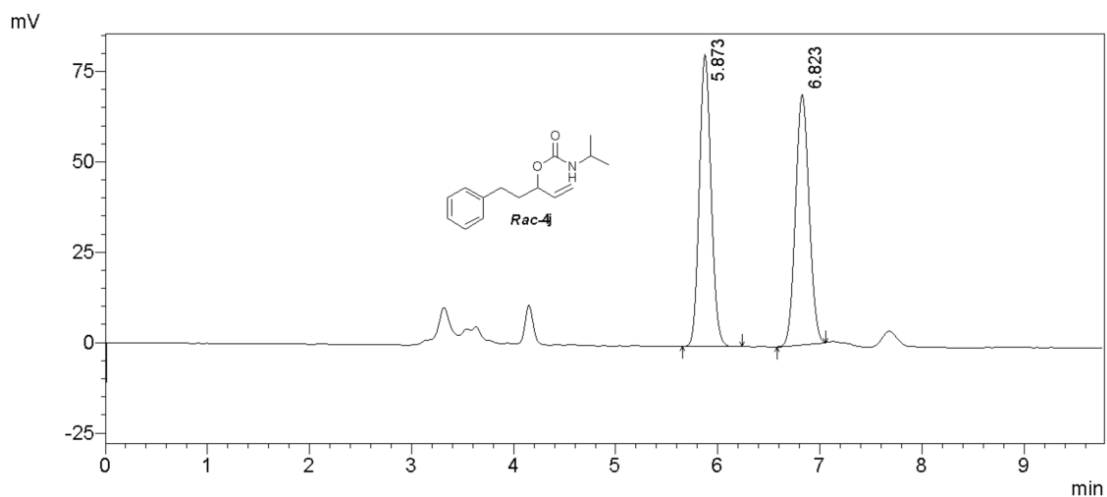

| Peak # | R. Time | Area   | Height | Area (%) | Height (%) |
|--------|---------|--------|--------|----------|------------|
| 1      | 5.873   | 647615 | 80702  | 50.329   | 53.859     |
| 2      | 6.823   | 639151 | 69138  | 49.671   | 46.141     |

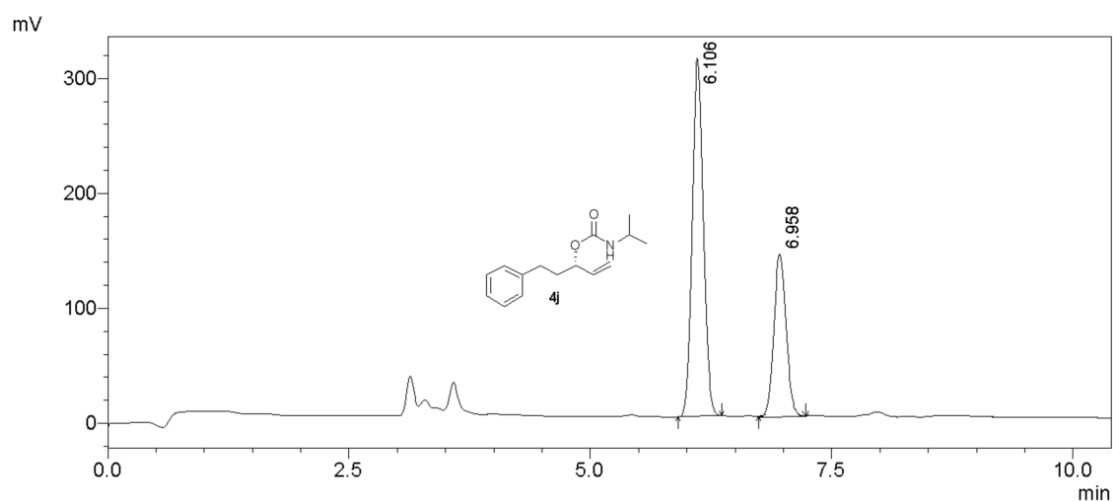

| Peak # | R. Time | Area    | Height | Area (%) | Height (%) |
|--------|---------|---------|--------|----------|------------|
| 1      | 6.106   | 2508992 | 311928 | 68.819   | 89.616     |
| 2      | 6.958   | 1136808 | 136140 | 31.181   | 30.384     |

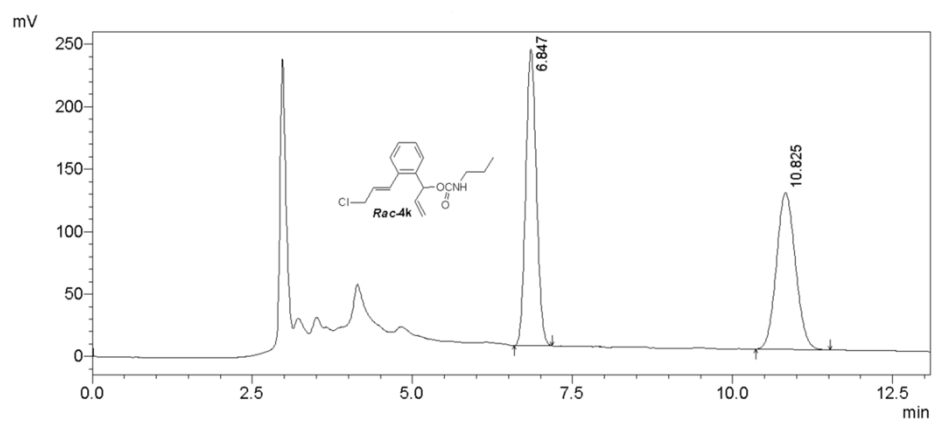

| Peak # | R. Time | Area    | Height | Area (%) | Height (%) |
|--------|---------|---------|--------|----------|------------|
| 1      | 6.847   | 2730040 | 237337 | 51.341   | 65.452     |
| 2      | 10.825  | 2587396 | 125274 | 48.659   | 34.548     |

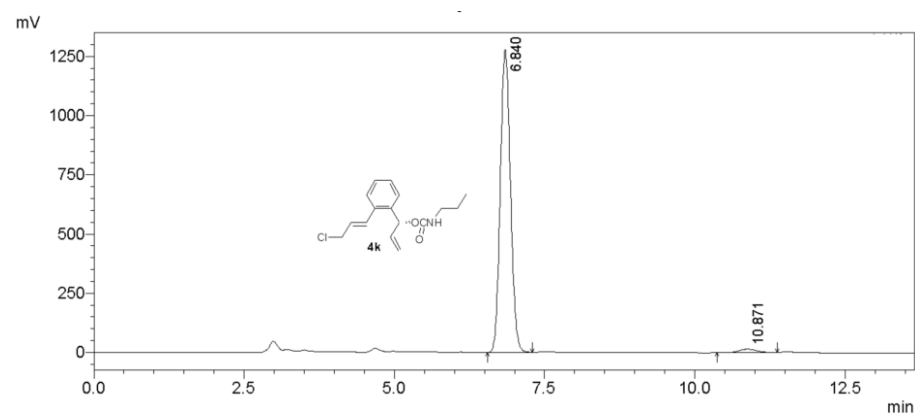

| Peak # | R. Time | Area     | Height  | Area (%) | Height (%) |
|--------|---------|----------|---------|----------|------------|
| 1      | 6.840   | 14965253 | 1277382 | 98.220   | 98.906     |
| 2      | 10.871  | 271153   | 14124   | 1.780    | 1.094      |

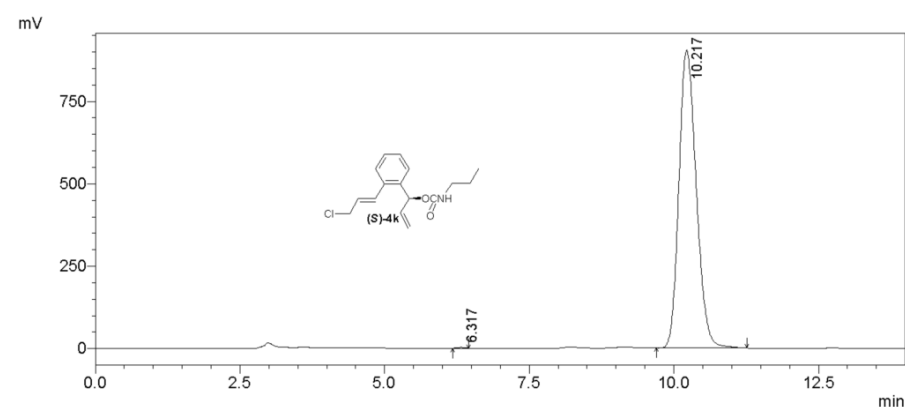

| Peak # | R. Time | Area     | Height | Area (%) | Height (%) |
|--------|---------|----------|--------|----------|------------|
| 1      | 6.317   | 20004    | 2272   | 0.106    | 0.251      |
| 2      | 10.217  | 18861850 | 903590 | 99.894   | 99.749     |

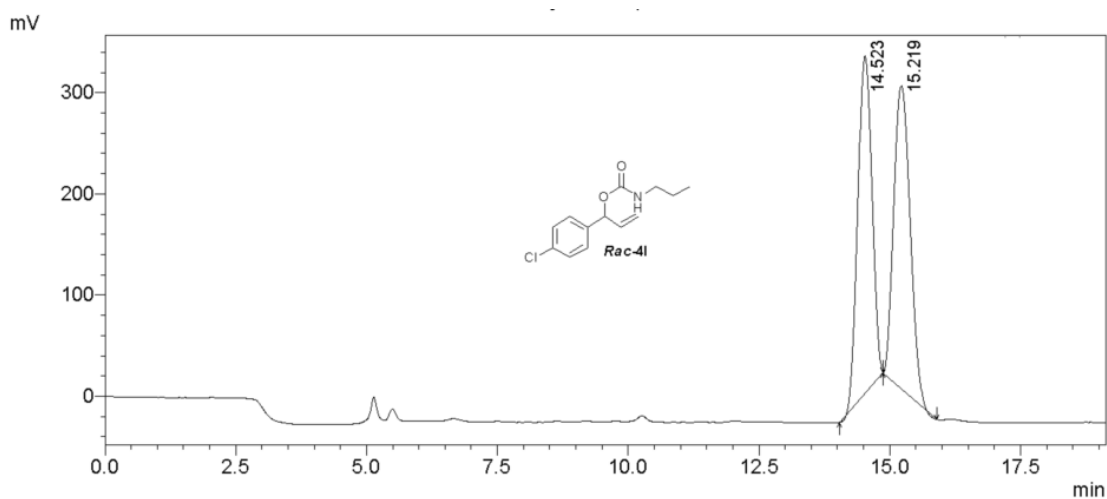

| Peak # | R. Time | Area    | Height | Area (%) | Height (%) |
|--------|---------|---------|--------|----------|------------|
| 1      | 14.523  | 6303820 | 333080 | 49.245   | 52.698     |
| 2      | 15.219  | 6497208 | 298971 | 50.755   | 47.302     |

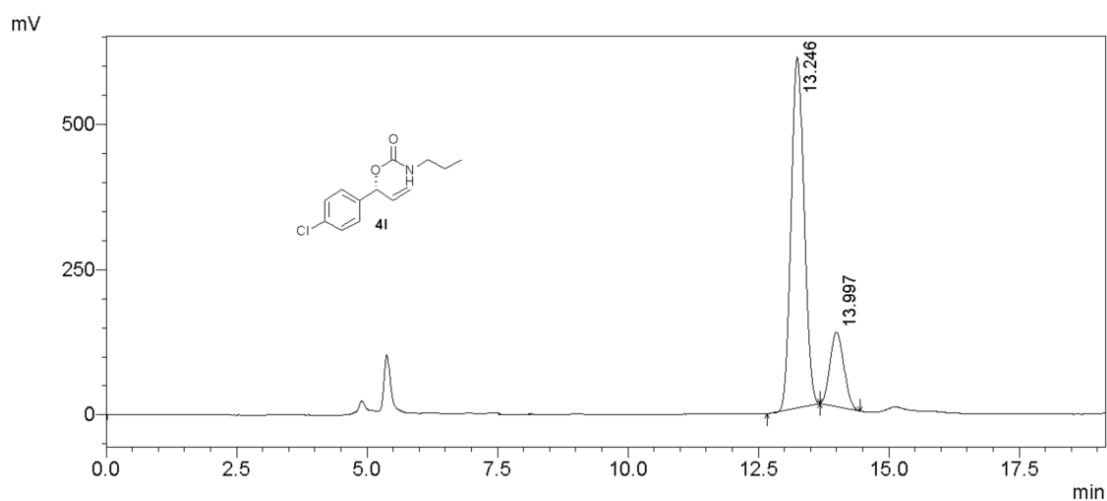

| Peak # | R. Time | Area     | Height | Area (%) | Height (%) |
|--------|---------|----------|--------|----------|------------|
| 1      | 13.246  | 10440940 | 603587 | 81.448   | 82.462     |
| 2      | 13.997  | 2378257  | 128375 | 18.552   | 17.538     |



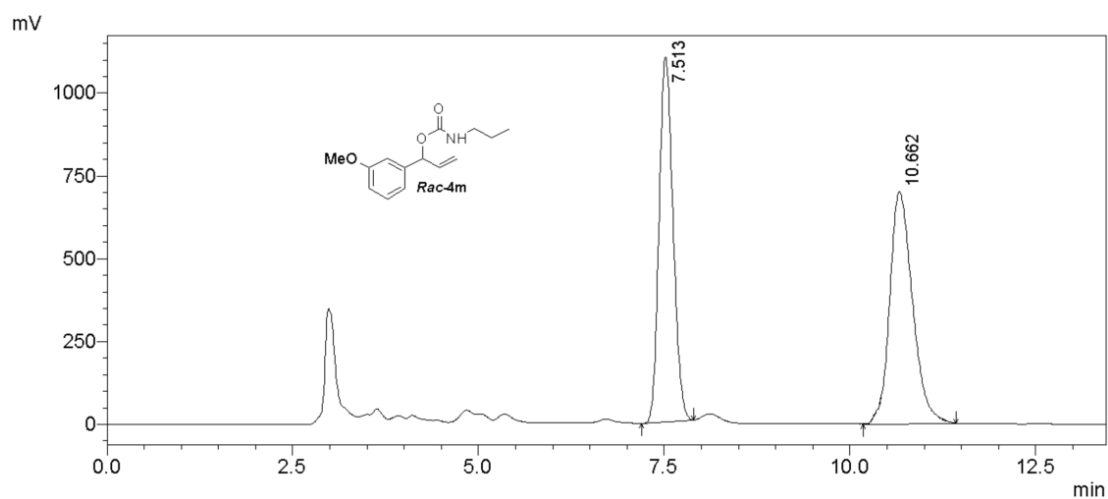

| Peak # | R. Time | Area     | Height  | Area (%) | Height (%) |
|--------|---------|----------|---------|----------|------------|
| 1      | 7.513   | 14414957 | 1103109 | 52.886   | 62.723     |
| 2      | 10.662  | 12841764 | 655595  | 47.114   | 37.277     |

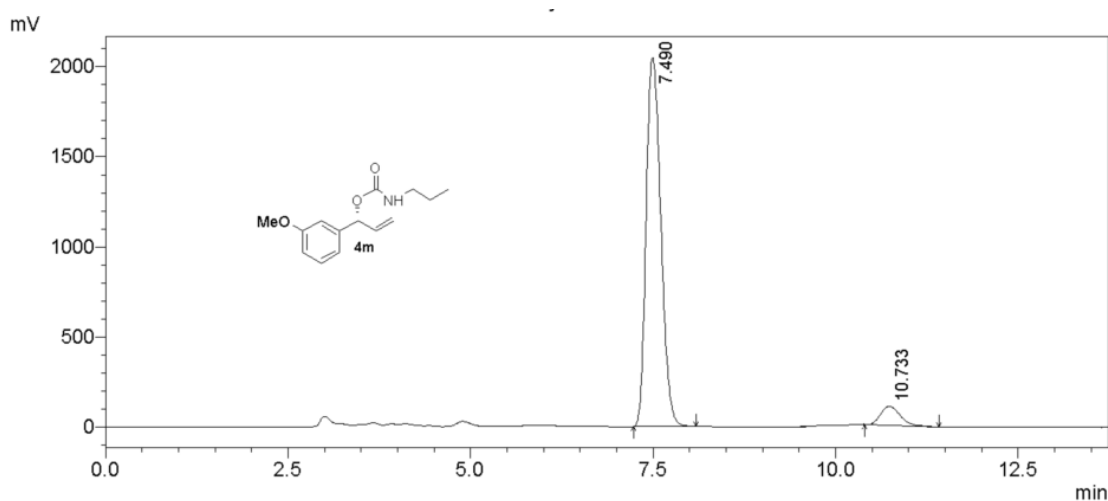

| Peak # | R. Time | Area     | Height  | Area (%) | Height (%) |
|--------|---------|----------|---------|----------|------------|
| 1      | 7.490   | 28608906 | 2047175 | 93.590   | 95.126     |
| 2      | 10.733  | 1959298  | 104888  | 6.410    | 4.874      |

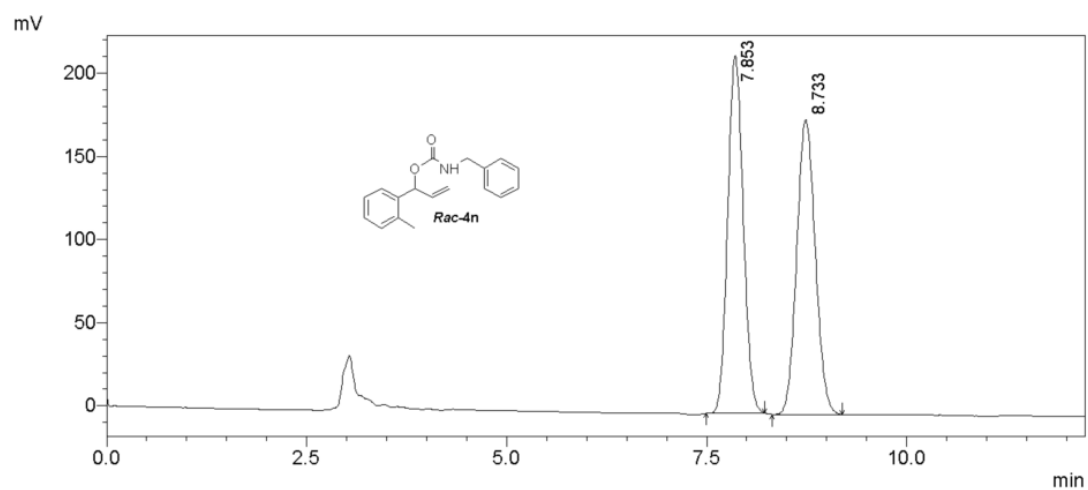

| Peak # | R. Time | Area    | Height | Area (%) | Height (%) |
|--------|---------|---------|--------|----------|------------|
| 1      | 7.853   | 2903371 | 214775 | 50.413   | 54.802     |
| 2      | 8.733   | 2855827 | 177134 | 49.587   | 45.198     |

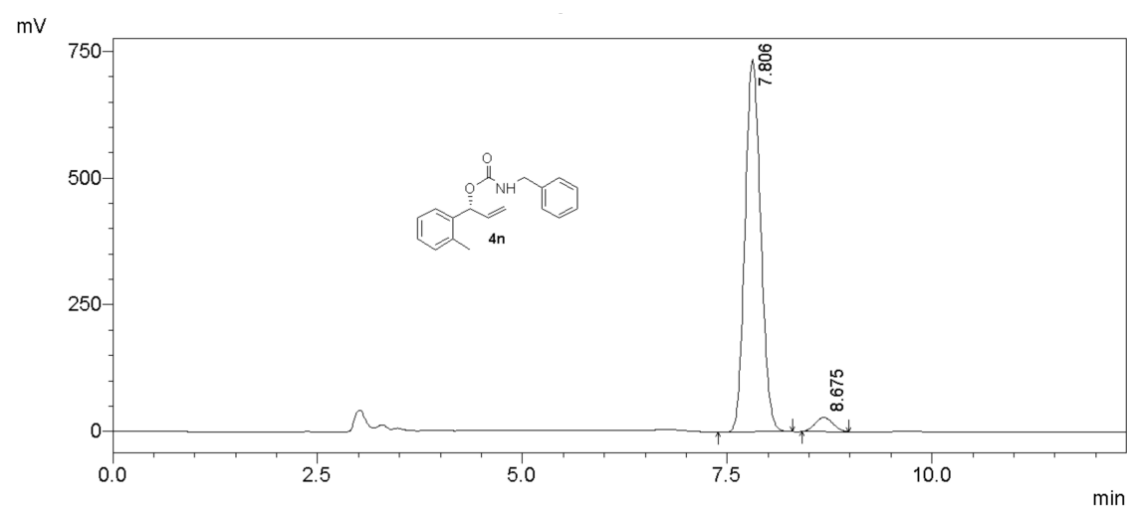

| Peak # | R. Time | Area    | Height | Area (%) | Height (%) |
|--------|---------|---------|--------|----------|------------|
| 1      | 7.806   | 9790799 | 734623 | 95.881   | 96.353     |
| 2      | 8.675   | 420586  | 27810  | 4.119    | 3.647      |

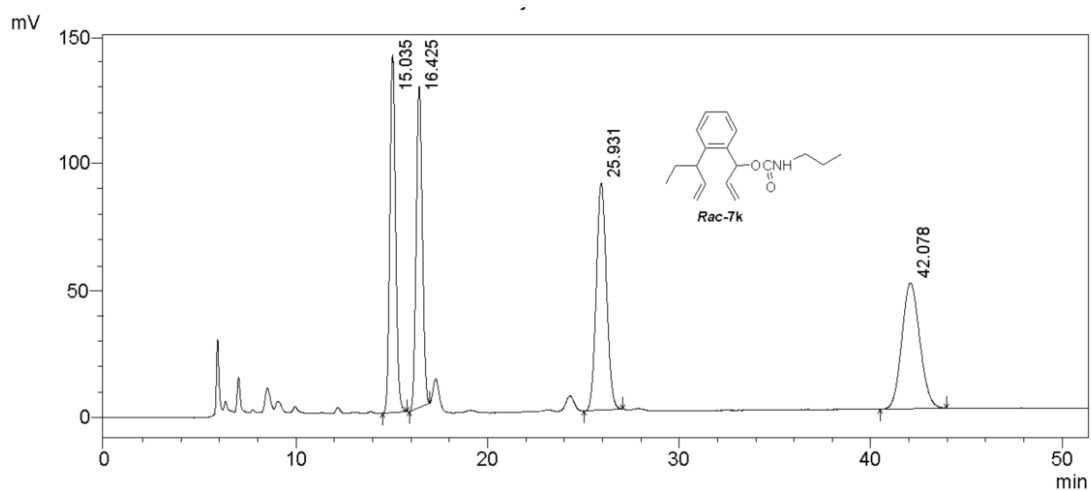

| Peak # | R. Time | Area    | Height | Area (%) | Height (%) |
|--------|---------|---------|--------|----------|------------|
| 1      | 15.035  | 2939683 | 140579 | 23.878   | 34.631     |
| 2      | 16.425  | 2817323 | 126422 | 22.884   | 31.144     |
| 3      | 25.931  | 3319413 | 89371  | 26.963   | 22.017     |
| 4      | 42.078  | 3234683 | 49556  | 26.275   | 12.208     |

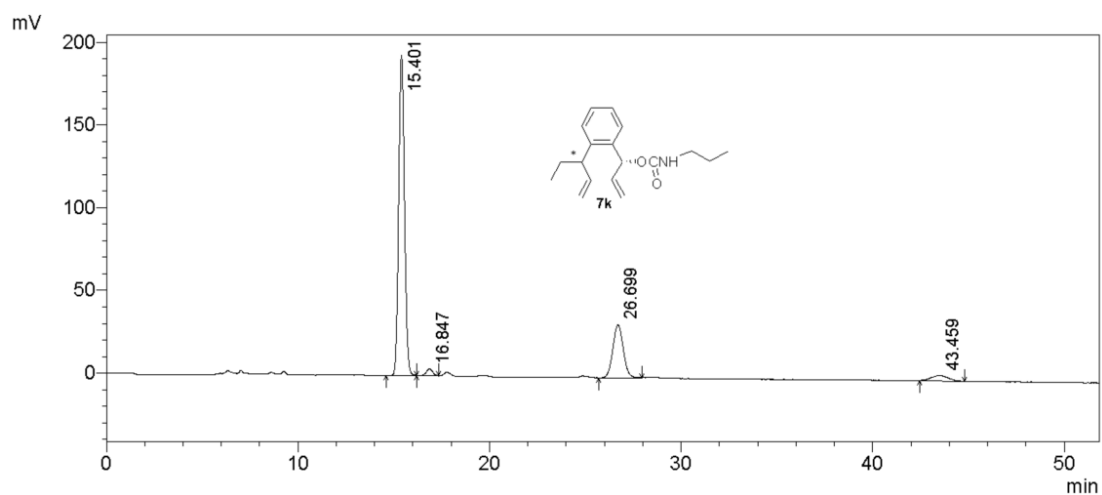

| Peak # | R. Time | Area    | Height | Area (%) | Height (%) |
|--------|---------|---------|--------|----------|------------|
| 1      | 15.401  | 4076996 | 193306 | 73.089   | 83.059     |
| 2      | 16.847  | 99820   | 4234   | 1.789    | 1.819      |
| 3      | 26.699  | 1201611 | 31985  | 21.541   | 23.743     |
| 4      | 43.459  | 199729  | 3208   | 3.581    | 1.379      |
